# Supplementary material for: Transcriptome-wide survey of gene expression changes and alternative splicing in Trichophyton rubrum in response to undecanoic acid
Source: PubMed Central journal article supplement (PMC5802734; doi:10.1038/s41598-018-20738-x), 2018-02-06
Supplement: 41598_2018_20738_MOESM1_ESM.pdf [file 41598_2018_20738_MOESM1_ESM.pdf]

# Transcriptome-wide survey of gene expression changes and alternative splicing in *Trichophyton rubrum* in response to undecanoic acid

Niege S. Mendes<sup>1</sup>, Tamires A. Bitencourt<sup>1</sup>, Pablo R. Sanches<sup>1</sup>, Rafael Silva-Rocha<sup>2</sup>,  
Nilce M. Martinez-Rossi<sup>1\*</sup> & Antonio Rossi<sup>1</sup>

<sup>1</sup>Department of Genetics, Ribeirão Preto Medical School, University of São Paulo,  
14049-900 Ribeirão Preto, SP, Brazil

<sup>2</sup>Department of Molecular and Cellular Biology, Ribeirão Preto Medical School,  
University of São Paulo, 14049-900 Ribeirão Preto, SP, Brazil

\* Correspondence and requests for materials should be addressed to N.M.M.-R. (email:  
[nmmrossi@usp.br](mailto:nmmrossi@usp.br))

Tel: +55 16 33153150; Fax: +55 16 33150222;

Niege S. Mendes, Tamires A. Bitencourt, and Pablo R. Sanches contributed equally to  
this work.

## Supplementary Figures

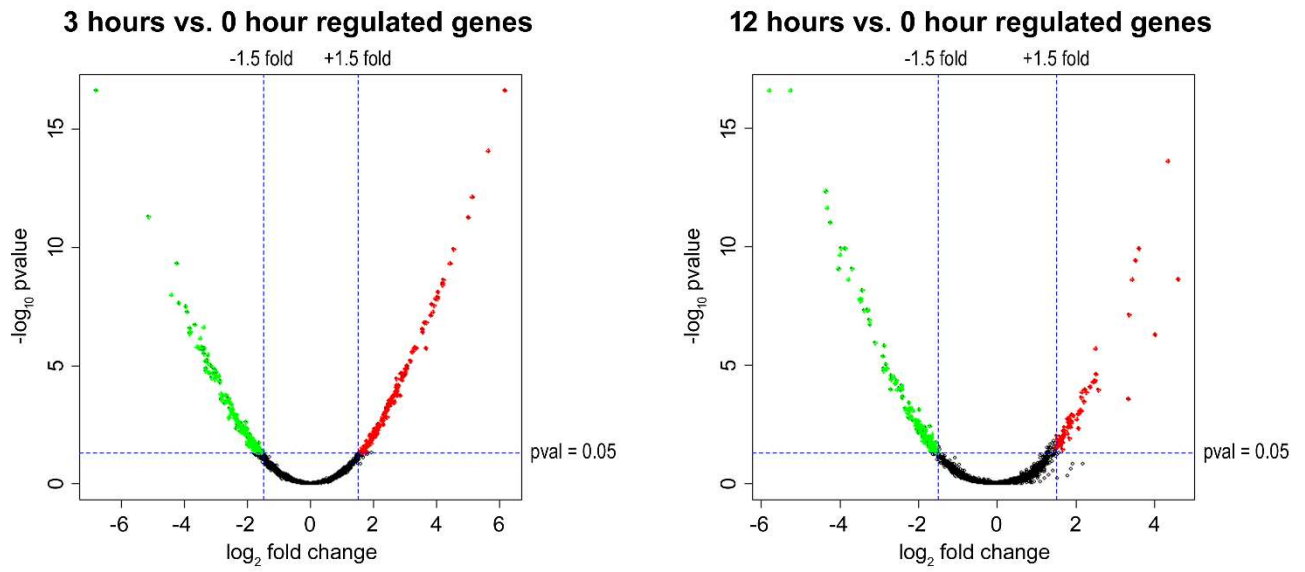

**Supplementary Figure S1.** Volcano plot of the different time points analysed. The  $\log_2$  fold changes for modulated genes are plotted against the  $-\log_{10} P$ -values under each condition.

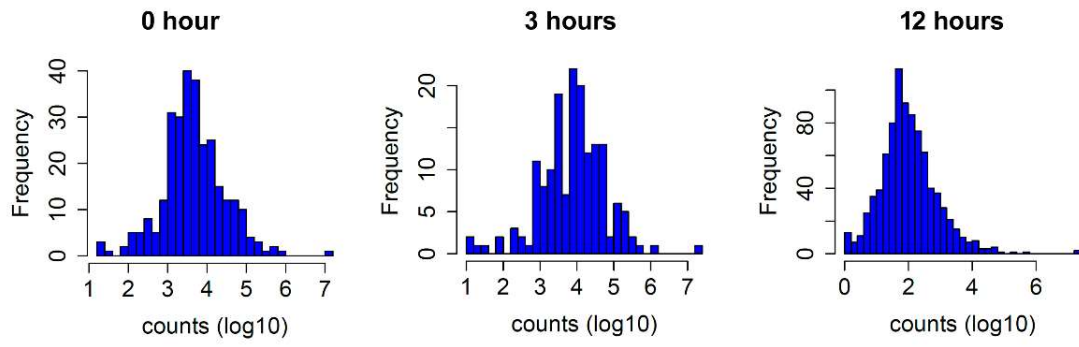

**Supplementary Figure S2.** Intron retention at each time point analysed. The distribution frequency is plotted against  $-\log_{10} P$ -values.

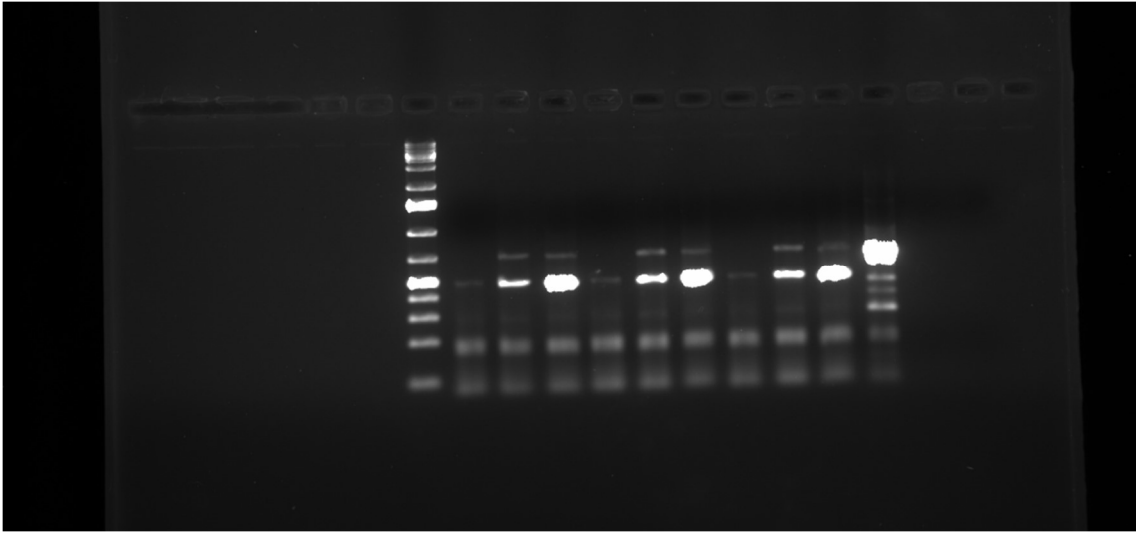

**Supplementary Figure S3.** RT-PCR showing the intron 2 retention in *impdh* gene in *T. rubrum*. The PCR amplicons were generated after electrophoresis in a 2% agarose gel containing ethidium bromide. The samples presented in this gel, starting from left side border: Molecular weight ladder (1kb plus, Thermo Scientific), 0h (control), 3h, and 12h time points of UDA exposure, assessed in first biological replicate, as well as for second, and third biological replicates, respectively. The last well is related to genomic DNA amplicon (PCR control). The expected size of each amplicon was 481 bp for the elimination of intron 2 and 684 bp for the retention of intron 2 (Full-length version agarose gel related to Fig. 7 agarose gel).

## Supplementary Tables

**Supplementary Table S1.** General features of RNA-seq reads mapped to the *T. rubrum* reference genome.

| <b>Sample</b>     | <b>Raw reads</b> | <b>High-quality reads</b> | <b>Mapped reads Bowtie2</b> | <b>Total mapped reads (%)</b> |
|-------------------|------------------|---------------------------|-----------------------------|-------------------------------|
| 0 hour I (SR)     | 40,489,531       | 40,149,007                | 27,473,437                  | 68.43                         |
| 0 hour II (PE)    | 28,987,947       | 27,213,240                | 23,039,089                  | 84.66                         |
| 0 hour III (PE)   | 28,893,017       | 27,136,542                | 22,525,587                  | 83.01                         |
| 3 hours I (SR)    | 60,724,079       | 60,235,207                | 30,221,364                  | 50.17                         |
| 3 hours II (PE)   | 67,859,806       | 63,440,961                | 37,801,840                  | 59.59                         |
| 3 hours III (PE)  | 28,182,638       | 26,438,636                | 20,611,097                  | 77.96                         |
| 12 hours I (SR)   | 45,617,478       | 44,174,487                | 25,165,161                  | 56.97                         |
| 12 hours II (PE)  | 30,746,489       | 28,524,813                | 16,251,516                  | 56.98                         |
| 12 hours III (PE) | 12,463,078       | 10,635,512                | 5,600,236                   | 52.66                         |

SR=Single-read; PE=Paired-end

**Supplementary Table S2.** Genes of *T. rubrum* modulated in response to UDA exposure at each time point.**3 hours vs. 0 hour**

| <b>ID</b>  | <b>3-0 hours</b> | <b>12-0 hours</b> | <b>Gene Product Name</b>                                                                      |
|------------|------------------|-------------------|-----------------------------------------------------------------------------------------------|
| TERG_01405 | 6.16             |                   | glutathione S-transferase ( <i>T. equinum</i> )                                               |
| TERG_04960 | 6.15             |                   | glutathione S-transferase Ure2-like, putative ( <i>A. benhamiae</i> )                         |
| TERG_03078 | 5.63             |                   | cytochrome P450 oxidoreductase OrdA-like, putative ( <i>T. verrucosum</i> )                   |
| TERG_08077 | 5.12             |                   | hypothetical protein                                                                          |
| TERG_07830 | 4.99             |                   | hypothetical protein                                                                          |
| TERG_00254 | 4.54             |                   | peroxisomal dehydratase ( <i>T. equinum</i> )                                                 |
| TERG_01937 | 4.42             |                   | short chain dehydrogenase ( <i>T. tonsurans</i> )                                             |
| TERG_05621 | 4.02             |                   | short chain dehydrogenase/reductase family oxidoreductase, putative ( <i>A. benhamiae</i> )   |
| TERG_05484 | 4.02             |                   | acyl-CoA dehydrogenase ( <i>T. tonsurans</i> )                                                |
| TERG_04232 | 3.95             |                   | 2-nitropropane dioxygenase ( <i>T. equinum</i> )                                              |
| TERG_00162 | 3.88             |                   | MFS multidrug transporter, putative ( <i>A. benhamiae</i> )                                   |
| TERG_11928 | 3.83             |                   | hypothetical protein                                                                          |
| TERG_02909 | 3.81             |                   | acyl-CoA oxidase, putative ( <i>T. verrucosum</i> )                                           |
| TERG_01512 | 3.68             |                   | mitochondrial tricarboxylate transporter (Ctp), putative ( <i>T. verrucosum</i> )             |
| TERG_08182 | 3.65             |                   | hypothetical protein                                                                          |
| TERG_03008 | 3.60             |                   | zinc-containing alcohol dehydrogenase, putative ( <i>A. benhamiae</i> )                       |
| TERG_03483 | 3.54             |                   | carnitine acetyl transferase ( <i>T. tonsurans</i> )                                          |
| TERG_01233 | 3.34             |                   | 3,2-trans-enoyl-CoA isomerase ( <i>T. equinum</i> )                                           |
| TERG_02747 | 3.34             |                   | cytochrome P450 alkane hydroxylase ( <i>A. benhamiae</i> )                                    |
| TERG_01742 | 3.33             |                   | hypothetical protein                                                                          |
| TERG_04500 | 3.31             |                   | peroxisomal membrane protein Pmp47 ( <i>T. tonsurans</i> )                                    |
| TERG_02423 | 3.24             |                   | hypothetical protein                                                                          |
| TERG_04714 | 3.23             |                   | mitochondrial phosphate carrier protein ( <i>T. tonsurans</i> )                               |
| TERG_02041 | 3.21             |                   | glutathione S-transferase ( <i>T. equinum</i> )                                               |
| TERG_12351 | 3.15             |                   | hypothetical protein                                                                          |
| TERG_02918 | 3.05             |                   | alkaline phytoceramidase ( <i>T. equinum</i> )                                                |
| TERG_03832 | 3.04             |                   | enoyl-CoA hydratase/isomerase ( <i>T. equinum</i> )                                           |
| TERG_07659 | 3.01             |                   | peroxisomal 3-ketoacyl-coA thiolase (Kat1), putative ( <i>A. benhamiae</i> )                  |
| TERG_03390 | 3.00             |                   | glutathione S-transferase ( <i>T. equinum</i> )                                               |
| TERG_07919 | 2.97             |                   | thioesterase family protein ( <i>T. verrucosum</i> )                                          |
| TERG_01784 | 2.91             |                   | oxidoreductase, short-chain dehydrogenase/reductase family, putative ( <i>T. verrucosum</i> ) |
| TERG_00216 | 2.88             |                   | endochitinase ( <i>T. equinum</i> )                                                           |
| TERG_11539 | 2.86             |                   | 3-oxoacyl-(acyl-carrier-protein) reductase ( <i>T. tonsurans</i> )                            |
| TERG_07544 | 2.85             |                   | lipase ( <i>T. tonsurans</i> )                                                                |
| TERG_02845 | 2.83             |                   | cercosporin toxin biosynthesis protein ( <i>T. equinum</i> )                                  |
| TERG_04389 | 2.78             |                   | carnitiny-CoA dehydratase ( <i>T. tonsurans</i> )                                             |
| TERG_11538 | 2.77             |                   | 3-oxoacyl-(acyl-carrier-protein) reductase ( <i>T. tonsurans</i> )                            |

|            |      |                                                                        |
|------------|------|------------------------------------------------------------------------|
| TERG_02488 | 2.75 | hypothetical protein                                                   |
| TERG_07691 | 2.73 | sterol carrier protein ( <i>T. tonsurans</i> )                         |
| TERG_08050 | 2.73 | acetamidase ( <i>T. equinum</i> )                                      |
| TERG_01936 | 2.73 | COP9 signalosome complex subunit 1 ( <i>T. equinum</i> )               |
| TERG_01077 | 2.72 | metallo-beta-lactamase domain-containing protein ( <i>T. equinum</i> ) |
| TERG_06106 | 2.72 | sulfate permease 2 ( <i>T. tonsurans</i> )                             |
| TERG_00009 | 2.71 | peroxisomal biogenesis factor ( <i>T. tonsurans</i> )                  |
| TERG_11946 | 2.71 | hypothetical protein                                                   |
| TERG_04620 | 2.68 | peroxin 20 ( <i>T. equinum</i> )                                       |
| TERG_05575 | 2.65 | MFS multidrug transporter ( <i>T. tonsurans</i> )                      |
| TERG_11639 | 2.64 | isocitrate lyase                                                       |
| TERG_04310 | 2.63 | alcohol dehydrogenase ( <i>T. tonsurans</i> )                          |
| TERG_00013 | 2.63 | ThiJ/PfpI family protein ( <i>A. benhamiae</i> )                       |
| TERG_07060 | 2.62 | acyl-CoA thioesterase II                                               |
| TERG_04010 | 2.60 | sporulation protein SPS19 ( <i>T. equinum</i> )                        |
| TERG_01833 | 2.59 | peroxisomal membrane protein ( <i>T. tonsurans</i> )                   |
| TERG_00950 | 2.56 | hypothetical protein                                                   |
| TERG_06686 | 2.54 | hypothetical protein                                                   |
| TERG_11638 | 2.54 | isocitrate lyase                                                       |
| TERG_11637 | 2.54 | isocitrate lyase                                                       |
| TERG_01270 | 2.53 | AMP dependent ligase ( <i>T. tonsurans</i> )                           |
| TERG_04837 | 2.53 | thioesterase ( <i>T. equinum</i> )                                     |
| TERG_00284 | 2.52 | peroxin 14 ( <i>T. tonsurans</i> )                                     |
| TERG_03305 | 2.52 | C-4 methylsterol oxidase ( <i>T. tonsurans</i> )                       |
| TERG_08336 | 2.51 | MFS multidrug transporter, putative ( <i>A. benhamiae</i> )            |
| TERG_03907 | 2.48 | neutral amino acid permease ( <i>T. tonsurans</i> )                    |
| TERG_08051 | 2.46 | 3-oxoacyl-(acyl-carrier-protein) reductase ( <i>T. tonsurans</i> )     |
| TERG_11702 | 2.46 | hypothetical protein                                                   |
| TERG_04817 | 2.44 | hypothetical protein                                                   |
| TERG_12131 | 2.43 | alcohol dehydrogenase ( <i>T. tonsurans</i> )                          |
| TERG_01281 | 2.42 | malate synthase, glyoxysomal                                           |
| TERG_04224 | 2.41 | ABC transporter                                                        |
| TERG_01641 | 2.35 | FK506 suppressor Sfk1 ( <i>T. equinum</i> )                            |
| TERG_03231 | 2.34 | cytochrome P450 52A12 ( <i>T. tonsurans</i> )                          |
| TERG_01986 | 2.34 | Fe-S protein assembly co-chaperone HscB                                |
| TERG_00575 | 2.34 | F-box domain protein ( <i>T. verrucosum</i> )                          |
| TERG_03983 | 2.32 | HPP family protein ( <i>T. verrucosum</i> )                            |
| TERG_12497 | 2.31 | hypothetical protein                                                   |
| TERG_08321 | 2.28 | hypothetical protein                                                   |
| TERG_02533 | 2.26 | aldose 1-epimerase ( <i>T. equinum</i> )                               |
| TERG_03510 | 2.26 | peroxisomal membrane anchor protein, putative ( <i>A. benhamiae</i> )  |
| TERG_03331 | 2.20 | F-box protein ( <i>T. equinum</i> )                                    |
| TERG_06064 | 2.18 | quinone oxidoreductase ( <i>T. equinum</i> )                           |

|            |      |                                                                                           |
|------------|------|-------------------------------------------------------------------------------------------|
| TERG_04092 | 2.16 | peroxisomal matrix protein importer Pex3 ( <i>T. tonsurans</i> )                          |
| TERG_12282 | 2.16 | glycosyl hydrolase ( <i>T. tonsurans</i> )                                                |
| TERG_06622 | 2.16 | hydrolase ( <i>T. tonsurans</i> )                                                         |
| TERG_05551 | 2.16 | hypothetical protein                                                                      |
| TERG_05044 | 2.13 | epoxide hydrolase, putative ( <i>A. benhamiae</i> )                                       |
| TERG_05562 | 2.13 | 2-hydroxychromene-2-carboxylate isomerase, putative ( <i>A. benhamiae</i> )               |
| TERG_06361 | 2.13 | ATP-dependent protease La                                                                 |
| TERG_00163 | 2.12 | siderochrome-iron transporter, putative ( <i>A. benhamiae</i> )                           |
| TERG_06177 | 2.12 | mitochondrial carrier protein, putative ( <i>T. verrucosum</i> )                          |
| TERG_02283 | 2.11 | MFS transporter, putative ( <i>T. verrucosum</i> )                                        |
| TERG_05411 | 2.09 | hypothetical protein                                                                      |
| TERG_07331 | 2.08 | integral membrane protein ( <i>T. tonsurans</i> )                                         |
| TERG_07224 | 2.06 | hypothetical protein                                                                      |
| TERG_07242 | 2.06 | di-trans,poly-cis-decaprenylcistransferase                                                |
| TERG_05199 | 2.06 | MFS gliotoxin efflux transporter GliA ( <i>T. verrucosum</i> )                            |
| TERG_01754 | 2.05 | oxidoreductase, 2-nitropropane dioxygenase family, putative ( <i>A. benhamiae</i> )       |
| TERG_06494 | 2.05 | hypothetical protein                                                                      |
| TERG_08069 | 2.05 | glutathione-disulfide reductase                                                           |
| TERG_00818 | 2.03 | aldehyde dehydrogenase 3B1 ( <i>T. equinum</i> )                                          |
| TERG_02842 | 2.03 | 6-hydroxy-D-nicotine oxidase ( <i>T. equinum</i> )                                        |
| TERG_04422 | 2.02 | NmrA family transcriptional regulator, putative ( <i>T. verrucosum</i> )                  |
| TERG_05556 | 2.02 | hypothetical protein                                                                      |
| TERG_05023 | 2.01 | calcium/proton exchanger                                                                  |
| TERG_04598 | 2.01 | NRPS-like enzyme, putative ( <i>A. benhamiae</i> )                                        |
| TERG_05244 | 2.00 | hypothetical protein                                                                      |
| TERG_04951 | 2.00 | U-box domain-containing protein ( <i>T. equinum</i> )                                     |
| TERG_05622 | 1.98 | uridine/cytidine kinase ( <i>T. equinum</i> )                                             |
| TERG_08519 | 1.98 | mitochondrial enoyl reductase ( <i>T. equinum</i> )                                       |
| TERG_02403 | 1.97 | glycolate oxidase, subunit GlcD                                                           |
| TERG_07957 | 1.96 | hypothetical protein                                                                      |
| TERG_01625 | 1.95 | FMP32 ( <i>M. gypseum</i> )                                                               |
| TERG_03780 | 1.95 | pyruvate dehydrogenase dihydrolipoamide acetyltransferase component ( <i>M. gypseum</i> ) |
| TERG_12281 | 1.95 | glycosyl hydrolase ( <i>T. tonsurans</i> )                                                |
| TERG_01759 | 1.94 | peroxisome assembly protein 10 ( <i>T. equinum</i> )                                      |
| TERG_04766 | 1.94 | calcium/proton exchanger                                                                  |
| TERG_00701 | 1.93 | cytochrome b5, putative ( <i>T. verrucosum</i> )                                          |
| TERG_05918 | 1.93 | glutamyl-tRNA(Gln) amidotransferase subunit A ( <i>T. equinum</i> )                       |
| TERG_12491 | 1.93 | carboxylesterase, putative ( <i>A. benhamiae</i> )                                        |
| TERG_07533 | 1.91 | hypothetical protein                                                                      |
| TERG_11757 | 1.91 | hypothetical protein                                                                      |
| TERG_08066 | 1.91 | STE/STE7 protein kinase                                                                   |
| TERG_02508 | 1.91 | ABC multidrug transporter, putative ( <i>A. benhamiae</i> )                               |



|            |      |                                                                                 |
|------------|------|---------------------------------------------------------------------------------|
| TERG_00616 | 1.90 | potassium/sodium efflux P-type ATPase, fungal-type                              |
| TERG_00631 | 1.89 | urate oxidase                                                                   |
| TERG_08908 | 1.89 | hypothetical protein                                                            |
| TERG_08116 | 1.88 | hypothetical protein                                                            |
| TERG_03274 | 1.88 | ammonium transporter MepA ( <i>A. benhamiae</i> )                               |
| TERG_08909 | 1.84 | hypothetical protein                                                            |
| TERG_06234 | 1.82 | 2,5-diketo-D-gluconic acid reductase A ( <i>T. equinum</i> )                    |
| TERG_01621 | 1.81 | DnaJ chaperone (Caj1), putative ( <i>T. verrucosum</i> )                        |
| TERG_06016 | 1.81 | glycosyl hydrolase ( <i>T. tonsurans</i> )                                      |
| TERG_06354 | 1.79 | SVP1-like protein ( <i>T. tonsurans</i> )                                       |
| TERG_03177 | 1.78 | RING finger domain protein, putative ( <i>A. benhamiae</i> )                    |
| TERG_00439 | 1.77 | hypothetical protein                                                            |
| TERG_08100 | 1.77 | CDP-diacylglycerol-inositol 3-phosphatidyltransferase PIS ( <i>T. equinum</i> ) |
| TERG_11780 | 1.77 | pre-mRNA splicing factor ( <i>T. tonsurans</i> )                                |
| TERG_07872 | 1.76 | homoserine O-acetyltransferase                                                  |
| TERG_01225 | 1.74 | GTPase-activating protein GYP7 ( <i>T. equinum</i> )                            |
| TERG_06594 | 1.73 | DUF1183 domain-containing protein ( <i>T. equinum</i> )                         |
| TERG_08104 | 1.73 | potassium/sodium efflux P-type ATPase, fungal-type                              |
| TERG_12290 | 1.73 | mitochondrial cytochrome b2 ( <i>T. tonsurans</i> )                             |
| TERG_02039 | 1.72 | 2-hydroxyphytanoyl-CoA lyase ( <i>T. tonsurans</i> )                            |
| TERG_02059 | 1.71 | AbpA protein ( <i>T. equinum</i> )                                              |
| TERG_04332 | 1.71 | phosphatidylinositol transporter ( <i>T. tonsurans</i> )                        |
| TERG_05624 | 1.71 | C6 transcription factor, putative ( <i>T. verrucosum</i> )                      |
| TERG_03141 | 1.70 | hypothetical protein                                                            |
| TERG_00577 | 1.69 | BAR domain-containing protein ( <i>T. tonsurans</i> )                           |
| TERG_08070 | 1.69 | enoyl-CoA hydratase/isomerase ( <i>T. tonsurans</i> )                           |
| TERG_02249 | 1.68 | phenylacetyl-CoA ligase ( <i>T. tonsurans</i> )                                 |
| TERG_01676 | 1.67 | 6,7-dimethyl-8-ribityllumazine synthase                                         |
| TERG_02038 | 1.67 | peroxisomal targeting signal receptor ( <i>T. equinum</i> )                     |
| TERG_05747 | 1.67 | alcohol dehydrogenase ( <i>T. tonsurans</i> )                                   |
| TERG_07991 | 1.67 | proline-rich protein ( <i>T. tonsurans</i> )                                    |
| TERG_01184 | 1.66 | fatty acid-binding protein ( <i>T. equinum</i> )                                |
| TERG_02087 | 1.66 | hypothetical protein                                                            |
| TERG_04721 | 1.65 | glutamate carboxypeptidase ( <i>T. equinum</i> )                                |
| TERG_08952 | 1.65 | long-chain-fatty-acid-CoA ligase ( <i>T. equinum</i> )                          |
| TERG_01825 | 1.64 | DNA repair protein Ntg1 ( <i>T. tonsurans</i> )                                 |
| TERG_02744 | 1.64 | NAD-dependent methanol dehydrogenase ( <i>T. equinum</i> )                      |
| TERG_04392 | 1.64 | dephospho-CoA kinase                                                            |
| TERG_06732 | 1.63 | peroxisomal membrane protein receptor Pex19, putative ( <i>A. benhamiae</i> )   |
| TERG_05359 | 1.62 | peroxin-26 ( <i>T. tonsurans</i> )                                              |
| TERG_05373 | 1.62 | peroxin 11C ( <i>T. equinum</i> )                                               |
| TERG_00919 | 1.61 | Phospholipid:diacylglycerol acyltransferase ( <i>T. equinum</i> )               |
| TERG_05037 | 1.61 | hypothetical protein                                                            |

|            |       |                                                                         |
|------------|-------|-------------------------------------------------------------------------|
| TERG_06240 | 1.60  | peroxisomal biogenesis factor 2 ( <i>T. tonsurans</i> )                 |
| TERG_08107 | 1.60  | phosphoglycerate mutase ( <i>T. tonsurans</i> )                         |
| TERG_04174 | 1.59  | citrinin biosynthesis oxydoreductase CtnB ( <i>T. equinum</i> )         |
| TERG_06015 | -1.52 | nuclear import and export protein Msn5 ( <i>T. tonsurans</i> )          |
| TERG_00783 | -1.55 | guanine nucleotide-binding protein subunit beta-like protein            |
| TERG_04478 | -1.58 | 40S ribosomal protein S1                                                |
| TERG_01550 | -1.59 | 60S ribosomal protein L38 ( <i>T. tonsurans</i> )                       |
| TERG_07641 | -1.60 | GPI-anchored cell wall protein Pst1, putative ( <i>A. benhamiae</i> )   |
| TERG_04323 | -1.61 | ATP-dependent bile acid permease ( <i>T. equinum</i> )                  |
| TERG_08869 | -1.62 | hypothetical protein                                                    |
| TERG_02604 | -1.64 | 40S ribosomal protein S20                                               |
| TERG_04324 | -1.64 | extracellular metalloproteinase 4                                       |
| TERG_04834 | -1.64 | rab GDP-dissociation inhibitor ( <i>T. tonsurans</i> )                  |
| TERG_02242 | -1.64 | yeast phase specific protein ( <i>M. gypseum</i> )                      |
| TERG_07065 | -1.65 | UMTA ( <i>T. equinum</i> )                                              |
| TERG_07865 | -1.65 | septin-1 ( <i>T. equinum</i> )                                          |
| TERG_01953 | -1.67 | 60S acidic ribosomal protein P2                                         |
| TERG_11551 | -1.67 | telomere and ribosome associated protein Stm1 ( <i>T. tonsurans</i> )   |
| TERG_12231 | -1.68 | DUF221 domain-containing protein ( <i>T. equinum</i> )                  |
| TERG_00657 | -1.69 | hypothetical protein                                                    |
| TERG_06646 | -1.70 | arrestin ( <i>T. equinum</i> )                                          |
| TERG_05971 | -1.72 | ribonucleoside-diphosphate reductase small chain                        |
| TERG_01330 | -1.72 | GPI anchored protein, putative ( <i>A. benhamiae</i> )                  |
| TERG_00511 | -1.73 | hypothetical protein                                                    |
| TERG_02630 | -1.74 | histone H2A                                                             |
| TERG_06481 | -1.74 | cell polarity protein ( <i>T. tonsurans</i> )                           |
| TERG_12232 | -1.74 | DUF221 domain-containing protein ( <i>T. equinum</i> )                  |
| TERG_05576 | -1.75 | cell wall glucanase (Scw11), putative ( <i>A. benhamiae</i> )           |
| TERG_07283 | -1.75 | GABA permease ( <i>T. equinum</i> )                                     |
| TERG_07269 | -1.75 | mannose-1-phosphate guanyltransferase                                   |
| TERG_01165 | -1.75 | 40S ribosomal protein S10b ( <i>T. equinum</i> )                        |
| TERG_04658 | -1.76 | imidazole glycerol phosphate synthase hisHF                             |
| TERG_12294 | -1.76 | histidine acid phosphatase, putative ( <i>T. verrucosum</i> )           |
| TERG_02263 | -1.76 | hypothetical protein                                                    |
| TERG_06854 | -1.76 | glutamine-serine-proline rich protein, putative ( <i>A. benhamiae</i> ) |
| TERG_01397 | -1.77 | C2H2 finger domain-containing protein ( <i>T. equinum</i> )             |
| TERG_06584 | -1.77 | hypothetical protein                                                    |
| TERG_07770 | -1.77 | importin 13, putative ( <i>T. verrucosum</i> )                          |
| TERG_05374 | -1.78 | hypothetical protein                                                    |
| TERG_08226 | -1.79 | hypothetical protein                                                    |
| TERG_01443 | -1.80 | ABC multidrug transporter ( <i>T. tonsurans</i> )                       |
| TERG_04862 | -1.80 | C6 transcription factor RosA ( <i>A. benhamiae</i> )                    |
| TERG_05644 | -1.80 | mucin family signaling protein Msb2, putative ( <i>T. verrucosum</i> )  |

|            |       |                                                                                      |
|------------|-------|--------------------------------------------------------------------------------------|
| TERG_02197 | -1.80 | nitrilase, putative ( <i>T. verrucosum</i> )                                         |
| TERG_06118 | -1.80 | hypothetical protein                                                                 |
| TERG_11550 | -1.82 | telomere and ribosome associated protein Stm1, putative ( <i>T. verrucosum</i> )     |
| TERG_00707 | -1.82 | GPI anchored serine-threonine rich protein ( <i>T. verrucosum</i> )                  |
| TERG_02496 | -1.84 | histone H1 ( <i>T. tonsurans</i> )                                                   |
| TERG_02795 | -1.85 | thiazole biosynthetic enzyme, mitochondrial                                          |
| TERG_07543 | -1.85 | hypothetical protein                                                                 |
| TERG_04514 | -1.86 | cell division control protein 12 ( <i>T. tonsurans</i> )                             |
| TERG_00414 | -1.86 | 3-beta hydroxysteroid dehydrogenase/isomerase family protein ( <i>A. benhamiae</i> ) |
| TERG_01012 | -1.87 | hypothetical protein                                                                 |
| TERG_08234 | -1.87 | TCTP family protein ( <i>T. verrucosum</i> )                                         |
| TERG_07059 | -1.91 | hypothetical protein                                                                 |
| TERG_02081 | -1.94 | RNA binding protein                                                                  |
| TERG_03352 | -1.94 | tyrosine decarboxylase ( <i>T. equinum</i> )                                         |
| TERG_01444 | -1.95 | nonribosomal peptide synthase Pes1 ( <i>A. benhamiae</i> )                           |
| TERG_03183 | -1.95 | hypothetical protein                                                                 |
| TERG_05626 | -1.96 | chitinase ( <i>T. equinum</i> )                                                      |
| TERG_03621 | -1.96 | hypothetical protein                                                                 |
| TERG_00543 | -1.98 | A-agglutinin anchorage subunit ( <i>M. canis</i> )                                   |
| TERG_03382 | -1.98 | ThiJ/PfpI family protein ( <i>A. benhamiae</i> )                                     |
| TERG_08225 | -2.01 | hypothetical protein                                                                 |
| TERG_01623 | -2.02 | MFS transporter ( <i>T. equinum</i> )                                                |
| TERG_00520 | -2.04 | hypothetical protein                                                                 |
| TERG_05409 | -2.04 | FAD dependent oxidoreductase ( <i>T. equinum</i> )                                   |
| TERG_03702 | -2.05 | hypothetical protein                                                                 |
| TERG_04558 | -2.05 | nucleoside diphosphate kinase                                                        |
| TERG_02735 | -2.06 | fatty acid oxygenase PpoC, putative ( <i>A. benhamiae</i> )                          |
| TERG_01744 | -2.07 | hypothetical protein                                                                 |
| TERG_01786 | -2.11 | DENN domain-containing protein ( <i>T. tonsurans</i> )                               |
| TERG_08987 | -2.11 | hypothetical protein                                                                 |
| TERG_02367 | -2.12 | hypothetical protein                                                                 |
| TERG_05651 | -2.15 | hypothetical protein                                                                 |
| TERG_05735 | -2.20 | dipeptidyl peptidase 4                                                               |
| TERG_01638 | -2.22 | hypothetical protein                                                                 |
| TERG_00830 | -2.22 | cytochrome P450 monooxygenase, putative ( <i>A. benhamiae</i> )                      |
| TERG_03758 | -2.26 | hypothetical protein                                                                 |
| TERG_08622 | -2.29 | transferase ( <i>M. canis</i> )                                                      |
| TERG_08129 | -2.35 | general amino-acid permease GAP1 ( <i>T. equinum</i> )                               |
| TERG_08620 | -2.35 | siderophore iron transporter ( <i>T. equinum</i> )                                   |
| TERG_06047 | -2.36 | hypothetical protein                                                                 |
| TERG_08557 | -2.37 | carboxypeptidase S1, putative ( <i>A. benhamiae</i> )                                |
| TERG_05524 | -2.44 | 3-deoxy-7-phosphoheptulonate synthase                                                |

|            |       |                                                                                      |
|------------|-------|--------------------------------------------------------------------------------------|
| TERG_08240 | -2.48 | methyltransferase, putative ( <i>T. verrucosum</i> )                                 |
| TERG_02368 | -2.49 | extracellular developmental signal biosynthesis protein FluG ( <i>A. benhamiae</i> ) |
| TERG_02189 | -2.50 | tubulin alpha-2 chain                                                                |
| TERG_06230 | -2.52 | hypothetical protein                                                                 |
| TERG_04308 | -2.54 | MFS sugar transporter ( <i>T. tonsurans</i> )                                        |
| TERG_00481 | -2.56 | beta-glucosidase, putative ( <i>T. verrucosum</i> )                                  |
| TERG_01685 | -2.57 | glutathione S-transferase, putative ( <i>A. benhamiae</i> )                          |
| TERG_07904 | -2.59 | tubulin beta chain                                                                   |
| TERG_04227 | -2.60 | ABC transporter ( <i>T. tonsurans</i> )                                              |
| TERG_04964 | -2.60 | RNA-binding protein ( <i>A. benhamiae</i> )                                          |
| TERG_02118 | -2.60 | GPI anchored protein, putative ( <i>A. benhamiae</i> )                               |
| TERG_02610 | -2.61 | WD repeat protein ( <i>T. verrucosum</i> )                                           |
| TERG_11951 | -2.67 | prp 6 CRoW domain-containing protein ( <i>M. canis</i> )                             |
| TERG_03985 | -2.68 | hypothetical protein                                                                 |
| TERG_12722 | -2.71 | transferase ( <i>M. canis</i> )                                                      |
| TERG_01401 | -2.80 | high affinity copper transporter ( <i>T. tonsurans</i> )                             |
| TERG_03624 | -2.88 | SUN domain protein (Uth1), putative ( <i>T. verrucosum</i> )                         |
| TERG_07456 | -2.90 | cell wall protein PhiA ( <i>T. equinum</i> )                                         |
| TERG_05816 | -2.91 | hypothetical protein                                                                 |
| TERG_07469 | -2.94 | SUN domain-containing protein ( <i>T. equinum</i> )                                  |
| TERG_12721 | -2.99 | transferase ( <i>M. canis</i> )                                                      |
| TERG_06934 | -3.03 | hypothetical protein                                                                 |
| TERG_01869 | -3.06 | TOS1 ( <i>T. equinum</i> )                                                           |
| TERG_04855 | -3.15 | hypothetical protein                                                                 |
| TERG_00598 | -3.22 | hypothetical protein                                                                 |
| TERG_01731 | -3.39 | hypothetical protein                                                                 |
| TERG_05424 | -3.47 | hypothetical protein                                                                 |
| TERG_02057 | -3.51 | hypothetical protein                                                                 |
| TERG_08619 | -3.56 | siderophore iron transporter mirB ( <i>T. equinum</i> )                              |
| TERG_06144 | -3.68 | cell wall serine-threonine-rich galactomannoprotein Mp1 ( <i>A. benhamiae</i> )      |
| TERG_02023 | -3.96 | extracellular matrix protein, putative ( <i>T. verrucosum</i> )                      |
| TERG_02278 | -4.24 | hypothetical protein                                                                 |

Gene expression values are expressed in log<sub>2</sub> fold change between each time point.

### 12 hours vs. 0 hour

| ID         | 3-0 hours | 12-0 hours | Gene Product Name                                                    |
|------------|-----------|------------|----------------------------------------------------------------------|
| TERG_05426 |           | 4.59       | choline-sulfatase                                                    |
| TERG_00092 |           | 4.01       | ubiquinone biosynthesis methyltransferase coq5 ( <i>T. equinum</i> ) |
| TERG_00508 |           | 3.35       | hypothetical protein                                                 |
| TERG_05288 |           | 3.33       | aprataxin-like protein ( <i>T. equinum</i> )                         |
| TERG_11963 |           | 2.50       | hypothetical protein                                                 |

|            |       |                                                                            |
|------------|-------|----------------------------------------------------------------------------|
| TERG_08264 | 2.50  | L-xylulose reductase                                                       |
| TERG_06727 | 2.48  | homoserine dehydrogenase                                                   |
| TERG_08969 | 2.46  | cytosolic Cu/Zn superoxide dismutase, putative ( <i>A. benhamiae</i> )     |
| TERG_00865 | 2.43  | hypothetical protein                                                       |
| TERG_01252 | 2.37  | catalase A                                                                 |
| TERG_07071 | 2.35  | 2-isopropylmalate synthase                                                 |
| TERG_07802 | 2.27  | siderophore biosynthesis acetylase AceI, putative ( <i>T. verrucosum</i> ) |
| TERG_08436 | 2.22  | hypothetical protein                                                       |
| TERG_03826 | 2.14  | hypothetical protein                                                       |
| TERG_08261 | 2.12  | glutamate decarboxylase                                                    |
| TERG_01741 | 2.06  | hypothetical protein                                                       |
| TERG_01347 | 2.05  | TIGR01456 family HAD hydrolase                                             |
| TERG_04504 | 1.93  | extracellular protein ( <i>T. equinum</i> )                                |
| TERG_08139 | 1.89  | NAD dependent epimerase/dehydratase ( <i>M. gypseum</i> )                  |
| TERG_05737 | 1.88  | hypothetical protein                                                       |
| TERG_07631 | 1.88  | hypothetical protein                                                       |
| TERG_06735 | 1.86  | oxysterol binding protein ( <i>T. tonsurans</i> )                          |
| TERG_04315 | 1.84  | conserved glutamic acid rich protein ( <i>T. verrucosum</i> )              |
| TERG_03212 | 1.83  | hypothetical protein                                                       |
| TERG_05466 | 1.80  | MFS transporter, putative ( <i>T. verrucosum</i> )                         |
| TERG_01979 | 1.79  | pirin domain protein, putative ( <i>A. benhamiae</i> )                     |
| TERG_07291 | 1.78  | hypothetical protein                                                       |
| TERG_08771 | 1.78  | extracellular serine-threonine rich protein ( <i>T. tonsurans</i> )        |
| TERG_00060 | 1.72  | GPI anchored cell wall protein, putative ( <i>A. benhamiae</i> )           |
| TERG_03193 | 1.70  | hypothetical protein                                                       |
| TERG_02641 | 1.70  | cystathionine gamma-synthase ( <i>T. equinum</i> )                         |
| TERG_03896 | 1.68  | mannose-6-phosphate isomerase                                              |
| TERG_05003 | 1.66  | NmrA family protein ( <i>T. equinum</i> )                                  |
| TERG_00942 | 1.64  | hypothetical protein                                                       |
| TERG_05841 | 1.63  | AmmeMemoRadiSam system protein B                                           |
| TERG_06927 | 1.61  | hypothetical protein                                                       |
| TERG_12156 | 1.61  | hypothetical protein                                                       |
| TERG_08353 | 1.59  | cytochrome P450 55A3 ( <i>T. tonsurans</i> )                               |
| TERG_00573 | 1.52  | hypothetical protein                                                       |
| TERG_03834 | 1.52  | ketol-acid reductoisomerase, mitochondrial                                 |
| TERG_03875 | 1.51  | glycogen phosphorylase ( <i>T. equinum</i> )                               |
| TERG_07427 | -1.51 | homeobox and C2H2 transcription factor, putative ( <i>A. benhamiae</i> )   |
| TERG_01904 | -1.53 | hypothetical protein                                                       |
| TERG_04184 | -1.54 | CorA family metal ion transporter, putative ( <i>A. benhamiae</i> )        |
| TERG_05450 | -1.55 | acetyltransferase ( <i>T. tonsurans</i> )                                  |
| TERG_02787 | -1.56 | polyketide synthase ( <i>T. tonsurans</i> )                                |
| TERG_00956 | -1.60 | extracellular thaumatin domain-containing protein ( <i>T. equinum</i> )    |
| TERG_03383 | -1.60 | hypothetical protein                                                       |

|            |       |                                                                                                 |
|------------|-------|-------------------------------------------------------------------------------------------------|
| TERG_02303 | -1.60 | ankyrin repeat protein ( <i>A. benhamiae</i> )                                                  |
| TERG_00671 | -1.61 | methyltransferase ( <i>T. equinum</i> )                                                         |
| TERG_03935 | -1.62 | hypothetical protein                                                                            |
| TERG_12580 | -1.62 | dihydrodipicolinate synthetase family protein ( <i>T. verrucosum</i> )                          |
| TERG_07139 | -1.63 | hypothetical protein                                                                            |
| TERG_01430 | -1.64 | hypothetical protein                                                                            |
| TERG_12085 | -1.66 | hypothetical protein                                                                            |
| TERG_03157 | -1.67 | NDT80 / PhoG like DNA-binding family protein ( <i>A. benhamiae</i> )                            |
| TERG_12093 | -1.67 | poly(ADP)-ribose polymerase PARP, putative ( <i>T. verrucosum</i> )                             |
| TERG_00553 | -1.69 | amino acid permease ( <i>T. equinum</i> )                                                       |
| TERG_03777 | -1.69 | hypothetical protein                                                                            |
| TERG_05604 | -1.69 | C6 finger domain-containing protein ( <i>T. equinum</i> )                                       |
| TERG_08195 | -1.70 | peptidase S41 family protein ( <i>M. gypseum</i> )                                              |
| TERG_02541 | -1.71 | FAD-dependent monooxygenase, putative ( <i>T. verrucosum</i> )                                  |
| TERG_02837 | -1.73 | 3-beta hydroxysteroid dehydrogenase/isomerase family protein, putative ( <i>T. verrucosum</i> ) |
| TERG_03963 | -1.73 | mannosyl phosphorylinositol ceramide synthase SUR1 ( <i>T. equinum</i> )                        |
| TERG_08029 | -1.74 | HMG box protein, putative ( <i>T. verrucosum</i> )                                              |
| TERG_00539 | -1.75 | F-box and WD40 domain-containing protein ( <i>T. tonsurans</i> )                                |
| TERG_02902 | -1.76 | hypothetical protein                                                                            |
| TERG_07282 | -1.77 | cytochrome P450 monooxygenase, putative ( <i>T. verrucosum</i> )                                |
| TERG_02593 | -1.81 | C2H2 finger domain protein, putative ( <i>T. verrucosum</i> )                                   |
| TERG_07346 | -1.81 | tRNA ligase ( <i>M. gypseum</i> )                                                               |
| TERG_01609 | -1.82 | Na/K ATPase alpha 1 subunit ( <i>T. equinum</i> )                                               |
| TERG_05680 | -1.82 | IBR domain containing protein ( <i>T. equinum</i> )                                             |
| TERG_08278 | -1.83 | serine/threonine protein kinase ( <i>T. tonsurans</i> )                                         |
| TERG_00257 | -1.84 | conserved predicted protein ( <i>A. benhamiae</i> )                                             |
| TERG_03095 | -1.84 | methyltransferase, putative ( <i>A. benhamiae</i> )                                             |
| TERG_04359 | -1.84 | hypothetical protein                                                                            |
| TERG_08045 | -1.84 | DUF455 domain-containing protein ( <i>T. equinum</i> )                                          |
| TERG_03984 | -1.86 | major facilitator superfamily transporter MFS-1 ( <i>M. canis</i> )                             |
| TERG_05987 | -1.86 | GTP-binding protein 1 ( <i>T. equinum</i> )                                                     |
| TERG_08961 | -1.87 | hypothetical protein                                                                            |
| TERG_05617 | -1.89 | hypothetical protein                                                                            |
| TERG_02664 | -1.90 | hypothetical protein                                                                            |
| TERG_03681 | -1.90 | leucine aminopeptidase ( <i>T. equinum</i> )                                                    |
| TERG_07597 | -1.92 | SOK1 ( <i>T. equinum</i> )                                                                      |
| TERG_06552 | -1.94 | aspartic-type endopeptidase (OpsB), putative ( <i>T. verrucosum</i> )                           |
| TERG_05616 | -1.95 | hypothetical protein                                                                            |
| TERG_01728 | -1.96 | hypothetical protein                                                                            |
| TERG_03929 | -1.98 | hypothetical protein                                                                            |
| TERG_02350 | -1.99 | endochitinase ( <i>T. equinum</i> )                                                             |
| TERG_00199 | -2.00 | serine/threonine protein kinase                                                                 |

|            |       |                                                                       |
|------------|-------|-----------------------------------------------------------------------|
| TERG_07037 | -2.01 | hypothetical protein                                                  |
| TERG_01511 | -2.03 | hypothetical protein                                                  |
| TERG_05469 | -2.03 | hypothetical protein                                                  |
| TERG_08613 | -2.04 | ABC multidrug transporter, putative ( <i>A. benhamiae</i> )           |
| TERG_00638 | -2.06 | cellobiose dehydrogenase, putative ( <i>A. benhamiae</i> )            |
| TERG_02958 | -2.06 | sulfite reductase flavoprotein component ( <i>T. equinum</i> )        |
| TERG_03707 | -2.07 | geranylgeranyl diphosphate synthase, putative ( <i>A. benhamiae</i> ) |
| TERG_05492 | -2.07 | hypothetical protein                                                  |
| TERG_03384 | -2.10 | aspartate aminotransferase, putative ( <i>A. benhamiae</i> )          |
| TERG_06679 | -2.14 | MFS transporter, putative ( <i>A. benhamiae</i> )                     |
| TERG_05456 | -2.16 | hypothetical protein                                                  |
| TERG_08298 | -2.18 | RTA1 domain-containing protein ( <i>T. equinum</i> )                  |
| TERG_00709 | -2.20 | MOSC domain-containing protein ( <i>T. equinum</i> )                  |
| TERG_06347 | -2.25 | hypothetical protein                                                  |
| TERG_00734 | -2.26 | dipeptidase ( <i>T. tonsurans</i> )                                   |
| TERG_08022 | -2.27 | bZIP transcription factor CpcA ( <i>T. verrucosum</i> )               |
| TERG_12606 | -2.33 | protease DPPV, putative ( <i>A. benhamiae</i> )                       |
| TERG_02400 | -2.35 | amino acid transporter, putative ( <i>A. benhamiae</i> )              |
| TERG_02517 | -2.41 | N-acetyltransferase, GNAT family, putative ( <i>A. benhamiae</i> )    |
| TERG_02183 | -2.43 | C2H2 finger domain-containing protein ( <i>T. equinum</i> )           |
| TERG_07008 | -2.46 | diaminopropionate ammonia-lyase ( <i>T. equinum</i> )                 |
| TERG_07673 | -2.56 | hypothetical protein                                                  |
| TERG_00066 | -2.59 | 4-hydroxyphenylpyruvate dioxygenase                                   |
| TERG_05451 | -2.59 | integral membrane protein ( <i>T. equinum</i> )                       |
| TERG_00068 | -2.61 | homogentisate 1,2-dioxygenase                                         |
| TERG_12438 | -2.63 | gamma-glutamyltranspeptidase ( <i>T. tonsurans</i> )                  |
| TERG_06701 | -2.69 | gamma-glutamyltransferase                                             |
| TERG_01782 | -2.70 | hypothetical protein                                                  |
| TERG_02534 | -2.70 | hypothetical protein                                                  |
| TERG_05650 | -2.71 | blasticidin-resistance protein ( <i>T. tonsurans</i> )                |
| TERG_11997 | -2.88 | potassium uptake transporter ( <i>T. equinum</i> )                    |
| TERG_00736 | -3.25 | alpha/beta hydrolase, putative ( <i>A. benhamiae</i> )                |
| TERG_12029 | -3.29 | hypothetical protein                                                  |
| TERG_08980 | -3.47 | hypothetical protein                                                  |
| TERG_07516 | -5.80 | hypothetical protein                                                  |

### 3 hours vs. 0 hour and 12 hours vs. 0 hour

| ID         | 3-0 hours | 12-0 hours | Gene Product Name                                                                          |
|------------|-----------|------------|--------------------------------------------------------------------------------------------|
| TERG_00823 | 4.22      | 2.08       | rhamnolipids biosynthesis 3-oxoacyl-[acyl-carrier-protein] reductase ( <i>T. equinum</i> ) |
| TERG_05363 | 4.19      | 1.67       | hypothetical protein                                                                       |

|            |       |       |                                                                                    |
|------------|-------|-------|------------------------------------------------------------------------------------|
| TERG_12530 | 4.19  | 1.50  | 3-ketoacyl-CoA thiolase peroxisomal A ( <i>T. tonsurans</i> )                      |
| TERG_06509 | 4.04  | 1.63  | glutamate synthase ( <i>T. tonsurans</i> )                                         |
| TERG_07143 | 3.92  | 3.51  | potassium/sodium efflux P-type ATPase, fungal-type                                 |
| TERG_04038 | 3.67  | 2.08  | acyl-CoA dehydrogenase ( <i>T. tonsurans</i> )                                     |
| TERG_03154 | 3.55  | 1.53  | 2-nitropropane dioxygenase ( <i>M. gypseum</i> )                                   |
| TERG_07721 | 3.34  | 2.20  | isopenicillin N-CoA epimerase ( <i>T. equinum</i> )                                |
| TERG_03881 | 3.29  | 1.66  | epoxide hydrolase ( <i>T. tonsurans</i> )                                          |
| TERG_08102 | 3.28  | 4.34  | 3-isopropylmalate dehydrogenase A                                                  |
| TERG_01463 | 3.17  | 2.15  | cytochrome c peroxidase ( <i>T. tonsurans</i> )                                    |
| TERG_01122 | 2.99  | 2.14  | heat shock protein Awh11, putative ( <i>A. benhamiae</i> )                         |
| TERG_06155 | 2.90  | 1.54  | phosphotransferase ( <i>T. tonsurans</i> )                                         |
| TERG_04765 | 2.72  | 3.42  | MFS transporter, putative ( <i>A. benhamiae</i> )                                  |
| TERG_04753 | 2.49  | 3.60  | 3-isopropylmalate dehydratase, large subunit                                       |
| TERG_01349 | 2.41  | 1.60  | glutathione peroxidase ( <i>T. tonsurans</i> )                                     |
| TERG_03464 | 2.35  | 1.81  | stress response protein ( <i>T. equinum</i> )                                      |
| TERG_08170 | 2.27  | 1.89  | fatty acid elongase gig30 ( <i>T. equinum</i> )                                    |
| TERG_08825 | 2.00  | -1.62 | bZIP transcription factor JlbA/IDI-4 ( <i>T. verrucosum</i> )                      |
| TERG_05769 | 1.98  | 2.02  | NAD(P)H-dependent D-xylose reductase ( <i>T. equinum</i> )                         |
| TERG_08245 | 1.95  | 1.70  | branched-chain amino acid aminotransferase ( <i>T. tonsurans</i> )                 |
| TERG_01190 | 1.94  | 1.61  | RNA binding protein ( <i>T. equinum</i> )                                          |
| TERG_03278 | 1.93  | 2.58  | hypothetical protein                                                               |
| TERG_02767 | 1.91  | 1.51  | pyroglutamyl peptidase type I ( <i>T. equinum</i> )                                |
| TERG_08347 | 1.76  | -1.55 | cytochrome P450 monooxygenase, putative ( <i>A. benhamiae</i> )                    |
| TERG_00523 | 1.63  | -2.57 | hypothetical protein                                                               |
| TERG_05615 | -1.67 | -2.24 | hsp70-like protein ( <i>T. equinum</i> )                                           |
| TERG_11968 | -1.71 | -1.98 | hypothetical protein                                                               |
| TERG_11814 | -1.75 | -2.43 | FAD dependent oxidoreductase, putative ( <i>A. benhamiae</i> )                     |
| TERG_12682 | -1.77 | -1.87 | hypothetical protein                                                               |
| TERG_07410 | -1.83 | -1.63 | hypothetical protein                                                               |
| TERG_07796 | -1.88 | -2.90 | oxidoreductase, short-chain dehydrogenase/reductase family ( <i>A. benhamiae</i> ) |
| TERG_00069 | -1.90 | -1.59 | fumarylacetoacetase                                                                |
| TERG_04917 | -1.91 | -1.51 | thiamine pyrophosphate enzyme, putative ( <i>A. benhamiae</i> )                    |
| TERG_05274 | -1.95 | -1.92 | hypothetical protein                                                               |
| TERG_00281 | -1.95 | -2.05 | AGC/RSK protein kinase                                                             |
| TERG_07408 | -1.98 | -1.63 | acetyltransferase, GNAT family ( <i>A. benhamiae</i> )                             |
| TERG_06022 | -2.01 | -1.92 | hypothetical protein                                                               |
| TERG_05055 | -2.02 | -1.64 | MFS multidrug transporter ( <i>T. tonsurans</i> )                                  |
| TERG_02406 | -2.02 | -2.55 | alpha-box mating type protein ( <i>T. tonsurans</i> )                              |
| TERG_08130 | -2.03 | -2.28 | ABC ATPase ( <i>T. equinum</i> )                                                   |
| TERG_04240 | -2.09 | 1.85  | cupin 2 domain-containing protein ( <i>T. equinum</i> )                            |
| TERG_04543 | -2.11 | -1.84 | aminotransferase GliI ( <i>T. equinum</i> )                                        |
| TERG_11998 | -2.12 | -2.50 | potassium uptake transporter ( <i>T. equinum</i> )                                 |
| TERG_07892 | -2.13 | -1.83 | SCP-like extracellular protein, putative ( <i>A. benhamiae</i> )                   |



|            |       |       |                                                                             |
|------------|-------|-------|-----------------------------------------------------------------------------|
| TERG_07409 | -2.17 | -2.04 | amino acid permease ( <i>T. equinum</i> )                                   |
| TERG_07795 | -2.25 | -1.72 | WSC domain protein, putative ( <i>A. benhamiae</i> )                        |
| TERG_05746 | -2.25 | -1.75 | hypothetical protein                                                        |
| TERG_12298 | -2.31 | -1.57 | hypothetical protein                                                        |
| TERG_05625 | -2.35 | -2.57 | class V chitinase, putative ( <i>T. verrucosum</i> )                        |
| TERG_06055 | -2.36 | -1.66 | NmrA-like family protein ( <i>A. benhamiae</i> )                            |
| TERG_06358 | -2.36 | -1.68 | dicer ( <i>T. tonsurans</i> )                                               |
| TERG_02214 | -2.37 | -2.02 | carboxypeptidase 2                                                          |
| TERG_06625 | -2.42 | -2.06 | serine protease, putative ( <i>A. benhamiae</i> )                           |
| TERG_03851 | -2.43 | -2.07 | serine/threonine protein kinase                                             |
| TERG_01116 | -2.43 | -2.24 | hypothetical protein                                                        |
| TERG_02746 | -2.51 | -4.25 | hypothetical protein                                                        |
| TERG_07665 | -2.52 | -2.26 | hypothetical protein                                                        |
| TERG_08614 | -2.58 | -2.02 | hypothetical protein                                                        |
| TERG_08046 | -2.60 | -2.42 | beta-lactamase ( <i>M. gypseum</i> )                                        |
| TERG_00791 | -2.65 | -2.22 | developmental regulatory protein WetA ( <i>T. verrucosum</i> )              |
| TERG_12578 | -2.72 | -2.83 | PEP phosphonmutase ( <i>T. equinum</i> )                                    |
| TERG_00967 | -2.74 | -1.86 | hypothetical protein                                                        |
| TERG_05799 | -2.81 | -2.89 | chlorophyll synthesis pathway protein BchC                                  |
| TERG_05545 | -2.82 | -1.75 | GNAT family acetyltransferase, putative ( <i>A. benhamiae</i> )             |
| TERG_03719 | -2.84 | -2.87 | MFS sugar transporter ( <i>T. tonsurans</i> )                               |
| TERG_03955 | -2.85 | -2.42 | RNA 3'-terminal phosphate cyclase, putative ( <i>T. verrucosum</i> )        |
| TERG_08363 | -3.01 | -1.61 | tyrosinase ( <i>T. verrucosum</i> )                                         |
| TERG_01599 | -3.03 | -3.30 | hypothetical protein                                                        |
| TERG_05854 | -3.12 | -3.47 | beta-lactamase ( <i>T. tonsurans</i> )                                      |
| TERG_07184 | -3.13 | -3.25 | HMG box transcriptional regulator, putative ( <i>A. benhamiae</i> )         |
| TERG_03706 | -3.21 | -1.69 | trichodiene oxygenase ( <i>T. equinum</i> )                                 |
| TERG_06883 | -3.25 | -3.69 | NAD dependent epimerase/dehydratase family protein ( <i>T. verrucosum</i> ) |
| TERG_01981 | -3.26 | -4.36 | hypothetical protein                                                        |
| TERG_11747 | -3.31 | -3.10 | hypothetical protein                                                        |
| TERG_05627 | -3.33 | -3.50 | LysM domain-containing protein ( <i>M. canis</i> )                          |
| TERG_06291 | -3.33 | -4.33 | malate dehydrogenase ( <i>T. verrucosum</i> )                               |
| TERG_07734 | -3.34 | -3.38 | O-methyltransferase, putative ( <i>T. verrucosum</i> )                      |
| TERG_00911 | -3.37 | -3.96 | hypothetical protein                                                        |
| TERG_03343 | -3.38 | -1.83 | fatty acid desaturase ( <i>T. equinum</i> )                                 |
| TERG_00806 | -3.43 | -3.78 | hypothetical protein                                                        |
| TERG_03981 | -3.54 | -3.24 | hypothetical protein                                                        |
| TERG_12627 | -3.60 | -4.00 | C-5 sterol desaturase ( <i>T. equinum</i> )                                 |
| TERG_00487 | -3.82 | -2.18 | hypothetical protein                                                        |
| TERG_07769 | -3.83 | -5.25 | hypothetical protein                                                        |
| TERG_12626 | -3.84 | -4.04 | C-5 sterol desaturase ( <i>T. equinum</i> )                                 |
| TERG_01338 | -3.92 | -2.79 | hydantoinase ( <i>T. equinum</i> )                                          |
| TERG_08004 | -4.18 | -3.86 | hypothetical protein                                                        |

|            |       |       |                                                             |
|------------|-------|-------|-------------------------------------------------------------|
| TERG_04547 | -4.42 | -3.43 | aquaporin ( <i>T. tonsurans</i> )                           |
| TERG_04234 | -5.14 | -1.93 | hydrophobin, putative ( <i>T. verrucosum</i> )              |
| TERG_01480 | -6.81 | -1.93 | MFS multidrug transporter, putative ( <i>A. benhamiae</i> ) |

---

**Supplementary Table S3.** Differential exon usage obtained from RNA-seq data analysis using DEXSeq.**3 hours vs. 0 hour**

| ID         | Exon | padj     | 3-0 hours | Gene Product Name                                                                                                   |
|------------|------|----------|-----------|---------------------------------------------------------------------------------------------------------------------|
| TERG_00069 | E001 | 5.62E-04 | 0.28      | fumarylacetoacetase                                                                                                 |
| TERG_00069 | E002 | 2.82E-04 | -0.06     | fumarylacetoacetase                                                                                                 |
| TERG_00074 | E001 | 1.43E-02 | -0.07     | biotin synthase                                                                                                     |
| TERG_00074 | E002 | 1.37E-02 | 0.05      | biotin synthase                                                                                                     |
| TERG_00098 | E001 | 2.64E-02 | 0.21      | high affinity methionine permease ( <i>A. benhamiae</i> )                                                           |
| TERG_00102 | E001 | 3.48E-02 | -0.07     | fumarate hydratase, class II                                                                                        |
| TERG_00138 | E002 | 1.51E-02 | 6.49      | tetraspanin ( <i>T. equinum</i> )                                                                                   |
| TERG_00216 | E004 | 2.49E-03 | 0.59      | endochitinase ( <i>T. equinum</i> )                                                                                 |
| TERG_00216 | E007 | 8.72E-05 | -0.13     | endochitinase ( <i>T. equinum</i> )                                                                                 |
| TERG_00242 | E005 | 1.75E-04 | 0.52      | 60S ribosomal protein L27-A ( <i>T. tonsurans</i> )                                                                 |
| TERG_00284 | E002 | 1.01E-06 | 1.37      | peroxin 14 ( <i>T. tonsurans</i> )                                                                                  |
| TERG_00332 | E001 | 1.12E-10 | 0.10      | nuclear transport factor 2                                                                                          |
| TERG_00332 | E002 | 1.82E-02 | 0.05      | nuclear transport factor 2                                                                                          |
| TERG_00332 | E004 | 1.57E-02 | -0.05     | nuclear transport factor 2                                                                                          |
| TERG_00332 | E005 | 4.10E-72 | -0.75     | nuclear transport factor 2                                                                                          |
| TERG_00332 | E006 | 1.54E-17 | -0.41     | nuclear transport factor 2                                                                                          |
| TERG_00346 | E002 | 4.67E-02 | -6.35     | hypothetical protein<br>Ser/Thr protein phosphatase family protein ( <i>A. benhamiae</i> )                          |
| TERG_00384 | E005 | 4.94E-02 | 0.08      |                                                                                                                     |
| TERG_00438 | E003 | 3.44E-05 | -0.30     | transcription factor SipA3 ( <i>T. tonsurans</i> )                                                                  |
| TERG_00438 | E005 | 1.93E-02 | -0.47     | transcription factor SipA3 ( <i>T. tonsurans</i> )                                                                  |
| TERG_00438 | E006 | 3.45E-02 | -0.20     | transcription factor SipA3 ( <i>T. tonsurans</i> )                                                                  |
| TERG_00438 | E008 | 4.39E-06 | 0.48      | transcription factor SipA3 ( <i>T. tonsurans</i> )                                                                  |
| TERG_00461 | E013 | 3.20E-02 | -0.08     | phenylalanine-tRNA ligase, beta subunit                                                                             |
| TERG_00481 | E008 | 4.41E-02 | -0.35     | beta-glucosidase, putative ( <i>T. verrucosum</i> )                                                                 |
| TERG_00580 | E003 | 2.17E-02 | 0.67      | 7-dehydrocholesterol reductase ( <i>T. equinum</i> )                                                                |
| TERG_00597 | E001 | 9.32E-05 | 0.33      | methyltransferase ( <i>T. equinum</i> )                                                                             |
| TERG_00597 | E003 | 3.18E-02 | -0.37     | methyltransferase ( <i>T. equinum</i> )<br>potassium/sodium efflux P-type ATPase, fungal-type                       |
| TERG_00616 | E007 | 6.28E-03 | -0.67     |                                                                                                                     |
| TERG_00624 | E007 | 6.06E-03 | 0.09      | actin polymerization protein Bzz1 ( <i>T. tonsurans</i> )                                                           |
| TERG_00659 | E002 | 1.46E-02 | -0.61     | 3-deoxy-7-phosphoheptulonate synthase                                                                               |
| TERG_00686 | E001 | 8.71E-03 | 0.10      | xaa-Pro dipeptidase ( <i>T. equinum</i> )                                                                           |
| TERG_00686 | E003 | 2.11E-02 | -0.24     | xaa-Pro dipeptidase ( <i>T. equinum</i> )                                                                           |
| TERG_00748 | E003 | 2.34E-02 | -0.22     | argininosuccinate synthase                                                                                          |
| TERG_00798 | E001 | 3.94E-03 | 0.29      | zinc knuckle domain protein ( <i>T. verrucosum</i> )<br>MFS multidrug transporter, putative ( <i>A. benhamiae</i> ) |
| TERG_00820 | E001 | 9.95E-06 | 0.18      |                                                                                                                     |
| TERG_00820 | E002 | 6.35E-03 | 0.35      | MFS multidrug transporter, putative ( <i>A. benhamiae</i> )                                                         |
| TERG_00829 | E002 | 1.75E-02 | -0.09     | hypothetical protein                                                                                                |
| TERG_00829 | E003 | 4.25E-02 | 0.39      | hypothetical protein<br>cytochrome P450 monooxygenase, putative ( <i>A. benhamiae</i> )                             |
| TERG_00830 | E002 | 5.10E-03 | -0.18     |                                                                                                                     |
| TERG_00831 | E005 | 1.72E-02 | 0.06      | gamma-glutamyltransferase                                                                                           |
| TERG_00835 | E002 | 2.37E-08 | 1.67      | hypothetical protein                                                                                                |
| TERG_00865 | E002 | 2.59E-02 | -0.37     | hypothetical protein                                                                                                |

|            |      |          |       |                                                                                                                  |
|------------|------|----------|-------|------------------------------------------------------------------------------------------------------------------|
| TERG_00865 | E007 | 1.29E-12 | -0.28 | hypothetical protein                                                                                             |
| TERG_00865 | E008 | 9.51E-06 | -0.68 | hypothetical protein                                                                                             |
| TERG_00877 | E001 | 5.67E-04 | 0.29  | CBS domain-containing protein ( <i>T. equinum</i> )                                                              |
| TERG_00877 | E003 | 6.24E-03 | -0.22 | CBS domain-containing protein ( <i>T. equinum</i> )                                                              |
| TERG_00877 | E004 | 1.89E-04 | -0.28 | CBS domain-containing protein ( <i>T. equinum</i> )                                                              |
| TERG_00908 | E001 | 2.45E-02 | -0.31 | extensin ( <i>M. canis</i> )                                                                                     |
| TERG_00978 | E002 | 5.72E-03 | -0.30 | RNA processing protein Grc3, putative ( <i>T. verrucosum</i> )                                                   |
| TERG_00978 | E008 | 2.73E-03 | 0.07  | RNA processing protein Grc3, putative ( <i>T. verrucosum</i> )                                                   |
| TERG_01012 | E001 | 3.40E-08 | -0.14 | hypothetical protein                                                                                             |
| TERG_01012 | E002 | 4.96E-02 | 0.48  | hypothetical protein                                                                                             |
| TERG_01012 | E003 | 1.09E-03 | 0.87  | hypothetical protein                                                                                             |
| TERG_01012 | E004 | 7.94E-07 | 0.45  | hypothetical protein                                                                                             |
| TERG_01046 | E001 | 2.82E-12 | -0.23 | H/ACA ribonucleoprotein complex subunit 1 metallo-beta-lactamase domain-containing protein ( <i>T. equinum</i> ) |
| TERG_01077 | E001 | 8.62E-03 | 0.40  | metallo-beta-lactamase domain-containing protein ( <i>T. equinum</i> )                                           |
| TERG_01077 | E002 | 9.08E-04 | 0.83  | metallo-beta-lactamase domain-containing protein ( <i>T. equinum</i> )                                           |
| TERG_01118 | E007 | 3.60E-04 | 0.51  | AhpC/TSA family protein ( <i>T. equinum</i> )                                                                    |
| TERG_01151 | E003 | 2.99E-02 | 0.05  | 26S proteasome non-ATPase regulatory subunit 13 ( <i>T. equinum</i> )                                            |
| TERG_01163 | E002 | 6.31E-33 | 0.64  | Hnt1 cyclin dependent kinase Kin28 interacting protein ( <i>T. tonsurans</i> )                                   |
| TERG_01163 | E004 | 1.56E-03 | -0.09 | Hnt1 cyclin dependent kinase Kin28 interacting protein ( <i>T. tonsurans</i> )                                   |
| TERG_01163 | E006 | 5.21E-05 | -0.17 | Hnt1 cyclin dependent kinase Kin28 interacting protein ( <i>T. tonsurans</i> )                                   |
| TERG_01198 | E002 | 1.51E-03 | -0.13 | pre-mRNA-splicing factor rse1                                                                                    |
| TERG_01198 | E003 | 1.23E-04 | -0.20 | pre-mRNA-splicing factor rse1                                                                                    |
| TERG_01198 | E006 | 1.27E-38 | 0.21  | pre-mRNA-splicing factor rse1                                                                                    |
| TERG_01239 | E001 | 1.99E-11 | 0.20  | Mis6 domain-containing protein ( <i>T. equinum</i> )                                                             |
| TERG_01239 | E002 | 1.79E-08 | -0.85 | Mis6 domain-containing protein ( <i>T. equinum</i> )                                                             |
| TERG_01239 | E003 | 6.46E-03 | -6.18 | Mis6 domain-containing protein ( <i>T. equinum</i> )                                                             |
| TERG_01267 | E002 | 4.58E-03 | 0.97  | amidophosphoribosyltransferase ( <i>T. equinum</i> )                                                             |
| TERG_01273 | E001 | 1.23E-04 | 0.20  | alpha-1,2-mannosidase, putative subfamily ( <i>T. verrucosum</i> )                                               |
| TERG_01273 | E002 | 1.43E-04 | -0.26 | alpha-1,2-mannosidase, putative subfamily ( <i>T. verrucosum</i> )                                               |
| TERG_01279 | E001 | 2.01E-06 | -0.95 | flavin-binding monooxygenase ( <i>T. equinum</i> )                                                               |
| TERG_01279 | E002 | 5.68E-11 | -0.78 | flavin-binding monooxygenase ( <i>T. equinum</i> )                                                               |
| TERG_01279 | E003 | 1.73E-06 | -0.81 | flavin-binding monooxygenase ( <i>T. equinum</i> )                                                               |
| TERG_01279 | E004 | 5.48E-06 | -0.98 | flavin-binding monooxygenase ( <i>T. equinum</i> )                                                               |
| TERG_01279 | E007 | 1.10E-21 | 0.36  | flavin-binding monooxygenase ( <i>T. equinum</i> )                                                               |
| TERG_01282 | E001 | 1.01E-04 | 0.23  | hypothetical protein                                                                                             |
| TERG_01282 | E002 | 1.90E-04 | -0.39 | hypothetical protein                                                                                             |
| TERG_01336 | E001 | 2.75E-02 | 0.49  | MFS transporter ( <i>T. equinum</i> )                                                                            |
| TERG_01356 | E001 | 5.87E-03 | -0.12 | small G-protein GPA2 ( <i>T. tonsurans</i> )                                                                     |
| TERG_01363 | E001 | 1.26E-03 | -0.18 | SET domain-containing protein ( <i>T. equinum</i> )                                                              |
| TERG_01363 | E004 | 9.53E-03 | 0.60  | SET domain-containing protein ( <i>T. equinum</i> )                                                              |
| TERG_01401 | E004 | 9.83E-05 | 0.63  | high affinity copper transporter ( <i>T. tonsurans</i> )                                                         |
| TERG_01401 | E005 | 1.77E-03 | -0.01 | high affinity copper transporter ( <i>T. tonsurans</i> )                                                         |
| TERG_01419 | E001 | 2.37E-03 | -0.02 | protein pyrABCN                                                                                                  |

|            |      |           |       |                                                                |
|------------|------|-----------|-------|----------------------------------------------------------------|
| TERG_01419 | E002 | 3.97E-03  | 0.18  | protein pyrABCN                                                |
| TERG_01480 | E001 | 1.48E-83  | -1.17 | MFS multidrug transporter, putative ( <i>A. benhamiae</i> )    |
| TERG_01480 | E002 | 1.28E-46  | -0.97 | MFS multidrug transporter, putative ( <i>A. benhamiae</i> )    |
| TERG_01480 | E003 | 1.81E-151 | 0.55  | MFS multidrug transporter, putative ( <i>A. benhamiae</i> )    |
| TERG_01481 | E001 | 7.52E-84  | -0.51 | MFS multidrug transporter, putative ( <i>A. benhamiae</i> )    |
| TERG_01481 | E002 | 5.84E-08  | 0.47  | MFS multidrug transporter, putative ( <i>A. benhamiae</i> )    |
| TERG_01481 | E003 | 3.84E-11  | 0.60  | MFS multidrug transporter, putative ( <i>A. benhamiae</i> )    |
| TERG_01481 | E004 | 3.13E-50  | 0.54  | MFS multidrug transporter, putative ( <i>A. benhamiae</i> )    |
| TERG_01495 | E001 | 3.04E-05  | 0.11  | COP9 signalosome complex subunit 12 ( <i>T. equinum</i> )      |
| TERG_01501 | E001 | 9.53E-03  | 0.11  | hypothetical protein                                           |
| TERG_01501 | E002 | 1.99E-02  | -0.15 | hypothetical protein                                           |
| TERG_01510 | E013 | 4.18E-02  | -0.28 | proline-specific permease ( <i>T. tonsurans</i> )              |
| TERG_01556 | E001 | 1.33E-02  | -0.13 | CaaX farnesyltransferase alpha subunit ( <i>T. tonsurans</i> ) |
| TERG_01556 | E002 | 2.70E-03  | -0.14 | CaaX farnesyltransferase alpha subunit ( <i>T. tonsurans</i> ) |
| TERG_01556 | E003 | 4.74E-03  | 0.32  | CaaX farnesyltransferase alpha subunit ( <i>T. tonsurans</i> ) |
| TERG_01564 | E005 | 3.77E-02  | -0.29 | pyruvate carboxylase                                           |
| TERG_01569 | E001 | 4.02E-03  | 0.11  | hypothetical protein                                           |
| TERG_01569 | E002 | 4.02E-03  | -0.11 | hypothetical protein                                           |
| TERG_01599 | E001 | 5.86E-04  | -0.22 | hypothetical protein                                           |
| TERG_01599 | E002 | 1.96E-02  | -0.15 | hypothetical protein                                           |
| TERG_01599 | E003 | 3.44E-05  | -0.21 | hypothetical protein                                           |
| TERG_01599 | E005 | 2.60E-02  | 0.20  | hypothetical protein                                           |
| TERG_01599 | E006 | 2.34E-28  | 1.47  | hypothetical protein                                           |
| TERG_01600 | E005 | 4.12E-02  | 0.11  | cytochrome c oxidase-assembly factor COX23, mitochondrial      |
| TERG_01685 | E001 | 2.93E-02  | -0.12 | glutathione S-transferase, putative ( <i>A. benhamiae</i> )    |
| TERG_01685 | E002 | 2.88E-02  | 0.10  | glutathione S-transferase, putative ( <i>A. benhamiae</i> )    |
| TERG_01718 | E003 | 2.40E-02  | -0.57 | cell division control protein Cdc6 ( <i>T. tonsurans</i> )     |
| TERG_01764 | E002 | 5.67E-04  | 0.86  | rab6 ( <i>T. equinum</i> )                                     |
| TERG_01764 | E004 | 1.27E-07  | 1.00  | rab6 ( <i>T. equinum</i> )                                     |
| TERG_01764 | E006 | 1.95E-10  | 0.94  | rab6 ( <i>T. equinum</i> )                                     |
| TERG_01819 | E001 | 3.67E-10  | 0.33  | protein CFT1                                                   |
| TERG_01819 | E007 | 5.14E-06  | -0.18 | protein CFT1                                                   |
| TERG_01877 | E001 | 1.52E-02  | 0.08  | FAM96B ( <i>M. canis</i> )                                     |
| TERG_01877 | E002 | 3.13E-02  | 0.23  | FAM96B ( <i>M. canis</i> )                                     |
| TERG_01877 | E004 | 2.53E-02  | -0.08 | FAM96B ( <i>M. canis</i> )                                     |
| TERG_01894 | E001 | 7.86E-03  | -0.14 | hypothetical protein                                           |
| TERG_01894 | E002 | 8.56E-03  | 0.17  | hypothetical protein                                           |
| TERG_01936 | E001 | 1.61E-213 | -0.41 | COP9 signalosome complex subunit 1 ( <i>T. equinum</i> )       |
| TERG_01936 | E002 | 1.80E-12  | 0.42  | COP9 signalosome complex subunit 1 ( <i>T. equinum</i> )       |
| TERG_01936 | E004 | 8.57E-09  | 0.51  | COP9 signalosome complex subunit 1 ( <i>T. equinum</i> )       |

|            |      |          |       |                                                                                                        |
|------------|------|----------|-------|--------------------------------------------------------------------------------------------------------|
| TERG_01936 | E005 | 2.87E-14 | 0.45  | COP9 signalosome complex subunit 1 ( <i>T. equinum</i> )                                               |
| TERG_01936 | E006 | 1.13E-12 | 0.63  | COP9 signalosome complex subunit 1 ( <i>T. equinum</i> )                                               |
| TERG_01938 | E001 | 2.63E-17 | 0.74  | hypothetical protein                                                                                   |
| TERG_01938 | E004 | 1.66E-04 | -0.29 | hypothetical protein                                                                                   |
| TERG_01938 | E005 | 6.03E-04 | -0.30 | hypothetical protein                                                                                   |
| TERG_01959 | E001 | 6.14E-05 | 0.19  | RNA polymerase Rpb1 C-terminal repeat domain-containing protein ( <i>T. equinum</i> )                  |
| TERG_01959 | E002 | 4.92E-05 | -0.12 | RNA polymerase Rpb1 C-terminal repeat domain-containing protein ( <i>T. equinum</i> )                  |
| TERG_01972 | E001 | 2.92E-09 | 0.57  | hypothetical protein                                                                                   |
| TERG_01972 | E004 | 2.40E-02 | -0.04 | hypothetical protein                                                                                   |
| TERG_01972 | E005 | 5.06E-03 | -0.11 | hypothetical protein                                                                                   |
| TERG_02075 | E001 | 1.54E-17 | 0.24  | T-complex protein 1 subunit delta                                                                      |
| TERG_02189 | E005 | 2.17E-05 | -0.06 | tubulin alpha-2 chain                                                                                  |
| TERG_02189 | E010 | 8.76E-04 | 0.17  | tubulin alpha-2 chain                                                                                  |
| TERG_02238 | E001 | 4.94E-05 | 0.32  | ATP phosphoribosyltransferase sister chromatid cohesion protein Dcc1, putative ( <i>A. benhamiae</i> ) |
| TERG_02312 | E004 | 5.03E-03 | -0.92 | vacuolar protein sorting protein 62 ( <i>M. gypseum</i> )                                              |
| TERG_02381 | E001 | 1.65E-03 | -0.17 | septin ( <i>T. tonsurans</i> )                                                                         |
| TERG_02382 | E001 | 1.23E-03 | -0.26 | ABcox13, cytochrome c oxidase subunit VIa, putative ( <i>A. benhamiae</i> )                            |
| TERG_02409 | E001 | 2.75E-02 | -0.06 | ABcox13, cytochrome c oxidase subunit VIa, putative ( <i>A. benhamiae</i> )                            |
| TERG_02409 | E003 | 2.42E-02 | -0.02 | ABcox13, cytochrome c oxidase subunit VIa, putative ( <i>A. benhamiae</i> )                            |
| TERG_02409 | E004 | 1.95E-17 | 0.59  | ABcox13, cytochrome c oxidase subunit VIa, putative ( <i>A. benhamiae</i> )                            |
| TERG_02423 | E001 | 8.82E-03 | -0.22 | hypothetical protein                                                                                   |
| TERG_02425 | E001 | 8.24E-16 | -0.36 | RNA binding protein ( <i>A. benhamiae</i> )                                                            |
| TERG_02425 | E002 | 9.22E-03 | 0.15  | RNA binding protein ( <i>A. benhamiae</i> )                                                            |
| TERG_02425 | E004 | 1.05E-06 | 0.16  | RNA binding protein ( <i>A. benhamiae</i> )                                                            |
| TERG_02425 | E005 | 1.56E-03 | 0.12  | RNA binding protein ( <i>A. benhamiae</i> )                                                            |
| TERG_02443 | E002 | 2.41E-02 | 0.19  | hypothetical protein                                                                                   |
| TERG_02478 | E003 | 5.73E-04 | -0.13 | 26S proteasome non-ATPase regulatory subunit 3 ( <i>T. equinum</i> )                                   |
| TERG_02488 | E001 | 2.01E-07 | 0.15  | hypothetical protein                                                                                   |
| TERG_02488 | E002 | 7.09E-07 | -0.55 | hypothetical protein                                                                                   |
| TERG_02531 | E004 | 3.18E-02 | -0.18 | GTPase ( <i>T. tonsurans</i> )                                                                         |
| TERG_02545 | E007 | 2.45E-02 | 0.48  | MFS monocarboxylate transporter ( <i>T. equinum</i> )                                                  |
| TERG_02545 | E009 | 6.84E-06 | 0.46  | MFS monocarboxylate transporter ( <i>T. equinum</i> )                                                  |
| TERG_02581 | E001 | 1.72E-03 | 0.26  | transmembrane protein UsgS ( <i>T. tonsurans</i> )                                                     |
| TERG_02594 | E001 | 2.41E-04 | -0.38 | phosphotransferase ( <i>T. tonsurans</i> )                                                             |
| TERG_02594 | E002 | 2.39E-04 | 0.35  | phosphotransferase ( <i>T. tonsurans</i> )                                                             |
| TERG_02601 | E006 | 6.13E-05 | -2.32 | Phosphoglucomutase ( <i>T. tonsurans</i> )                                                             |
| TERG_02654 | E006 | 5.37E-03 | 6.93  | membrane transporter ( <i>T. equinum</i> )                                                             |
| TERG_02694 | E004 | 4.67E-03 | -1.21 | sulfite efflux pump SSU1 short chain dehydrogenase/reductase family protein ( <i>A. benhamiae</i> )    |
| TERG_02848 | E001 | 3.21E-04 | -0.69 | WD repeat containing protein pop3 ( <i>T. tonsurans</i> )                                              |
| TERG_02853 | E001 | 1.37E-02 | -0.05 | WD repeat containing protein pop3 ( <i>T. tonsurans</i> )                                              |
| TERG_02853 | E008 | 2.19E-03 | 0.11  | WD repeat containing protein pop3 ( <i>T. tonsurans</i> )                                              |
| TERG_02878 | E003 | 5.87E-03 | 0.51  | eukaryotic translation initiation factor 3 subunit F                                                   |
| TERG_02922 | E001 | 1.64E-02 | -0.82 | phosphoserine phosphatase ( <i>T. tonsurans</i> )                                                      |

|            |      |          |       |                                                                                                                  |
|------------|------|----------|-------|------------------------------------------------------------------------------------------------------------------|
| TERG_02939 | E005 | 8.20E-03 | 6.58  | Ser/Thr protein phosphatase ( <i>T. tonsurans</i> )                                                              |
| TERG_02977 | E005 | 1.02E-02 | 0.52  | hypothetical protein<br>allergenic cerato-platanin Asp F13 ( <i>T.</i>                                           |
| TERG_02993 | E001 | 8.77E-05 | 0.73  | <i>verrucosum</i> )<br>allergenic cerato-platanin Asp F13 ( <i>T.</i>                                            |
| TERG_02993 | E003 | 2.20E-03 | -0.09 | <i>verrucosum</i> )                                                                                              |
| TERG_03009 | E002 | 7.15E-03 | 0.81  | hypothetical protein                                                                                             |
| TERG_03038 | E003 | 4.64E-03 | -0.15 | translation elongation factor Tu<br>NADP-dependent malic enzyme MaeA ( <i>T.</i>                                 |
| TERG_03065 | E004 | 1.82E-03 | -0.35 | <i>tonsurans</i> )<br>cytochrome P450 oxidoreductase OrdA-like,                                                  |
| TERG_03078 | E005 | 5.81E-05 | -1.40 | putative ( <i>T. verrucosum</i> )<br>cytochrome P450 oxidoreductase OrdA-like,                                   |
| TERG_03078 | E007 | 3.70E-04 | -2.07 | putative ( <i>T. verrucosum</i> )<br>cytochrome P450 oxidoreductase OrdA-like,                                   |
| TERG_03078 | E009 | 6.84E-06 | -1.57 | putative ( <i>T. verrucosum</i> )<br>cytochrome P450 oxidoreductase OrdA-like,                                   |
| TERG_03078 | E013 | 2.02E-03 | -3.01 | putative ( <i>T. verrucosum</i> )                                                                                |
| TERG_03081 | E004 | 3.32E-02 | -0.32 | intracellular protein transporter ( <i>T. equinum</i> )                                                          |
| TERG_03094 | E001 | 1.64E-02 | -0.25 | deacetylase complex subunit Sds3 ( <i>T. tonsurans</i> )                                                         |
| TERG_03094 | E002 | 9.63E-03 | 0.05  | deacetylase complex subunit Sds3 ( <i>T. tonsurans</i> )<br>transcriptional corepressor of histone genes (Hir3), |
| TERG_03118 | E001 | 1.85E-02 | -0.15 | putative ( <i>A. benhamiae</i> )                                                                                 |
| TERG_03124 | E003 | 4.53E-02 | 0.33  | histone                                                                                                          |
| TERG_03190 | E001 | 1.22E-02 | 0.07  | NADPH oxidase regulator NoxR ( <i>T. equinum</i> )<br>nonribosomal peptide synthase, putative ( <i>A.</i>        |
| TERG_03194 | E001 | 4.10E-03 | -0.17 | <i>benhamiae</i> )<br>nonribosomal peptide synthase, putative ( <i>A.</i>                                        |
| TERG_03194 | E002 | 5.09E-03 | 0.25  | <i>benhamiae</i> )                                                                                               |
| TERG_03211 | E003 | 1.01E-06 | 0.47  | actin cytoskeleton protein ( <i>T. tonsurans</i> )                                                               |
| TERG_03286 | E006 | 6.75E-03 | -1.62 | vacuolar transporter chaperone 4 ( <i>T. tonsurans</i> )                                                         |
| TERG_03338 | E005 | 6.25E-03 | -0.14 | acylphosphatase ( <i>T. tonsurans</i> )                                                                          |
| TERG_03340 | E005 | 1.51E-03 | 0.42  | oxidoreductase ( <i>T. equinum</i> )                                                                             |
| TERG_03340 | E006 | 1.58E-02 | 0.46  | oxidoreductase ( <i>T. equinum</i> )<br>TAM domain methyltransferase, putative ( <i>A.</i>                       |
| TERG_03373 | E004 | 4.12E-02 | -1.10 | <i>benhamiae</i> )                                                                                               |
| TERG_03441 | E001 | 4.76E-02 | -1.28 | hypothetical protein                                                                                             |
| TERG_03441 | E003 | 1.48E-03 | 0.19  | hypothetical protein                                                                                             |
| TERG_03494 | E008 | 4.61E-02 | 1.17  | hypothetical protein                                                                                             |
| TERG_03506 | E001 | 4.12E-02 | -0.18 | hypothetical protein                                                                                             |
| TERG_03506 | E002 | 3.06E-02 | 0.02  | hypothetical protein                                                                                             |
| TERG_03516 | E002 | 1.72E-04 | 0.53  | mitochondrial dicarboxylate carrier ( <i>T. tonsurans</i> )                                                      |
| TERG_03517 | E005 | 5.94E-07 | -0.19 | cytochrome c oxidase subunit VIb ( <i>T. tonsurans</i> )                                                         |
| TERG_03528 | E005 | 2.25E-02 | -0.01 | cytochrome c                                                                                                     |
| TERG_03572 | E003 | 4.72E-03 | 0.09  | hypothetical protein                                                                                             |
| TERG_03654 | E001 | 4.25E-02 | 0.28  | NADH-cytochrome b5 reductase 1                                                                                   |
| TERG_03654 | E003 | 6.43E-04 | -0.02 | NADH-cytochrome b5 reductase 1                                                                                   |
| TERG_03699 | E001 | 3.62E-04 | 0.24  | hypothetical protein                                                                                             |
| TERG_03699 | E003 | 1.21E-09 | -1.19 | hypothetical protein                                                                                             |
| TERG_03706 | E001 | 2.50E-05 | 0.32  | trichodiene oxygenase ( <i>T. equinum</i> )                                                                      |
| TERG_03719 | E001 | 6.96E-03 | 0.06  | MFS sugar transporter ( <i>T. tonsurans</i> )                                                                    |
| TERG_03719 | E002 | 7.12E-03 | -0.08 | MFS sugar transporter ( <i>T. tonsurans</i> )                                                                    |
| TERG_03727 | E001 | 4.27E-02 | 0.11  | hypothetical protein                                                                                             |
| TERG_03736 | E007 | 2.71E-02 | -0.29 | transcriptional corepressor Cyc8 ( <i>T. equinum</i> )                                                           |

|            |      |          |       |                                                                |
|------------|------|----------|-------|----------------------------------------------------------------|
| TERG_03818 | E002 | 3.64E-03 | -0.19 | import receptor ( <i>T. tonsurans</i> )                        |
| TERG_03821 | E007 | 1.30E-02 | -0.18 | SLY1 ( <i>T. equinum</i> )                                     |
| TERG_03875 | E002 | 1.19E-06 | 0.35  | glycogen phosphorylase ( <i>T. equinum</i> )                   |
| TERG_03875 | E003 | 6.14E-28 | 1.57  | glycogen phosphorylase ( <i>T. equinum</i> )                   |
| TERG_03905 | E001 | 2.45E-02 | 0.28  | tubulin gamma chain                                            |
| TERG_03933 | E004 | 1.10E-03 | 0.97  | ABC metal ion transporter ( <i>T. equinum</i> )                |
| TERG_03933 | E008 | 1.77E-02 | 0.91  | ABC metal ion transporter ( <i>T. equinum</i> )                |
| TERG_03981 | E007 | 1.01E-06 | 0.14  | hypothetical protein                                           |
| TERG_04073 | E006 | 5.35E-13 | 0.27  | glutathione synthetase                                         |
| TERG_04077 | E007 | 1.09E-09 | 0.17  | domain membrane protein ( <i>M. gypseum</i> )                  |
| TERG_04079 | E001 | 2.80E-02 | -0.08 | 4-aminobutyrate aminotransferase                               |
| TERG_04079 | E004 | 9.41E-04 | 0.03  | 4-aminobutyrate aminotransferase                               |
| TERG_04095 | E005 | 3.31E-02 | 0.33  | hypothetical protein                                           |
| TERG_04107 | E002 | 1.41E-04 | 0.38  | FunK1 protein kinase ( <i>M. canis</i> )                       |
| TERG_04145 | E010 | 1.95E-17 | 0.71  | ATP synthase subunit beta, mitochondrial                       |
| TERG_04234 | E001 | 3.30E-07 | 0.02  | hydrophobin, putative ( <i>T. verrucosum</i> )                 |
| TERG_04269 | E001 | 7.07E-03 | 0.16  | hypothetical protein                                           |
| TERG_04312 | E001 | 6.70E-09 | 0.24  | ferric-chelate reductase ( <i>T. tonsurans</i> )               |
| TERG_04312 | E005 | 6.09E-03 | -0.32 | ferric-chelate reductase ( <i>T. tonsurans</i> )               |
| TERG_04312 | E006 | 1.16E-02 | -0.27 | ferric-chelate reductase ( <i>T. tonsurans</i> )               |
| TERG_04411 | E005 | 5.06E-03 | 0.03  | dipeptidase ( <i>T. equinum</i> )                              |
| TERG_04457 | E002 | 8.56E-03 | 0.10  | POS9-activating factor FAP7 ( <i>T. tonsurans</i> )            |
| TERG_04457 | E003 | 3.94E-03 | -0.17 | POS9-activating factor FAP7 ( <i>T. tonsurans</i> )            |
| TERG_04458 | E002 | 5.56E-03 | 0.14  | RdgB/HAM1 family non-canonical purine NTP pyrophosphatase      |
| TERG_04458 | E004 | 2.00E-04 | -0.14 | RdgB/HAM1 family non-canonical purine NTP pyrophosphatase      |
| TERG_04458 | E005 | 4.25E-02 | -0.13 | RdgB/HAM1 family non-canonical purine NTP pyrophosphatase      |
| TERG_04547 | E001 | 3.43E-07 | 0.12  | aquaporin ( <i>T. tonsurans</i> )                              |
| TERG_04547 | E002 | 2.41E-02 | -0.22 | aquaporin ( <i>T. tonsurans</i> )                              |
| TERG_04580 | E006 | 4.58E-03 | -0.85 | NADP-specific glutamate dehydrogenase                          |
| TERG_04606 | E001 | 4.34E-03 | -0.36 | general amino acid permease AGP2 ( <i>T. equinum</i> )         |
| TERG_04621 | E001 | 7.95E-31 | 0.90  | protein transporter SEC13                                      |
| TERG_04651 | E001 | 1.71E-05 | 0.24  | NADH-ubiquinone oxidoreductase 19.3 kDa subunit, mitochondrial |
| TERG_04651 | E003 | 2.25E-02 | -0.10 | NADH-ubiquinone oxidoreductase 19.3 kDa subunit, mitochondrial |
| TERG_04651 | E004 | 5.00E-04 | -0.05 | NADH-ubiquinone oxidoreductase 19.3 kDa subunit, mitochondrial |
| TERG_04651 | E006 | 4.48E-16 | -0.03 | NADH-ubiquinone oxidoreductase 19.3 kDa subunit, mitochondrial |
| TERG_04655 | E004 | 2.86E-02 | -0.23 | ribosomal RNA methyltransferase MRM2 ( <i>T. equinum</i> )     |
| TERG_04655 | E007 | 2.75E-04 | 0.40  | ribosomal RNA methyltransferase MRM2 ( <i>T. equinum</i> )     |
| TERG_04656 | E002 | 1.72E-02 | -0.59 | ubiquitin-like modifier-activating enzyme ATG7                 |
| TERG_04664 | E001 | 9.91E-03 | -0.16 | retinoblastoma-binding protein ( <i>T. equinum</i> )           |
| TERG_04664 | E003 | 9.88E-03 | 0.18  | retinoblastoma-binding protein ( <i>T. equinum</i> )           |
| TERG_04684 | E002 | 1.99E-02 | -0.15 | shugoshin family protein ( <i>A. benhamiae</i> )               |
| TERG_04684 | E003 | 4.77E-03 | 0.15  | shugoshin family protein ( <i>A. benhamiae</i> )               |
| TERG_04743 | E002 | 9.53E-03 | -0.10 | C6 finger domain protein, putative ( <i>A. benhamiae</i> )     |
| TERG_04743 | E006 | 3.40E-08 | 0.12  | C6 finger domain protein, putative ( <i>A. benhamiae</i> )     |



|            |      |          |       |                                                                             |
|------------|------|----------|-------|-----------------------------------------------------------------------------|
| TERG_04754 | E001 | 3.79E-02 | 0.10  | UDP-N-acetyl-glucosamine-1-P transferase ( <i>T. tonsurans</i> )            |
| TERG_04769 | E001 | 2.55E-02 | -0.17 | extracellular serine carboxypeptidase, putative ( <i>T. verrucosum</i> )    |
| TERG_04805 | E002 | 2.71E-02 | -0.59 | MFS multidrug transporter, putative ( <i>T. verrucosum</i> )                |
| TERG_04852 | E001 | 4.34E-03 | 0.04  | U-box domain-containing protein ( <i>T. tonsurans</i> )                     |
| TERG_04852 | E004 | 8.56E-03 | -0.04 | U-box domain-containing protein ( <i>T. tonsurans</i> )                     |
| TERG_04931 | E002 | 1.43E-02 | -0.41 | allantoate permease ( <i>T. equinum</i> )                                   |
| TERG_05069 | E004 | 4.75E-08 | 0.33  | GMF family protein ( <i>T. equinum</i> )                                    |
| TERG_05090 | E003 | 2.02E-05 | 0.82  | rho-gdp dissociation inhibitor ( <i>T. equinum</i> )                        |
| TERG_05090 | E004 | 2.45E-02 | 0.68  | rho-gdp dissociation inhibitor ( <i>T. equinum</i> )                        |
| TERG_05090 | E006 | 8.62E-03 | 0.77  | rho-gdp dissociation inhibitor ( <i>T. equinum</i> )                        |
| TERG_05090 | E007 | 5.91E-03 | -0.04 | rho-gdp dissociation inhibitor ( <i>T. equinum</i> )                        |
| TERG_05090 | E008 | 2.14E-09 | 0.86  | rho-gdp dissociation inhibitor ( <i>T. equinum</i> )                        |
| TERG_05161 | E001 | 1.68E-04 | -0.16 | 26S proteasome regulatory subunit rpn-1                                     |
| TERG_05161 | E006 | 1.71E-07 | 0.05  | 26S proteasome regulatory subunit rpn-1                                     |
| TERG_05197 | E001 | 5.22E-03 | -0.32 | protein kinase activator ( <i>T. tonsurans</i> )                            |
| TERG_05208 | E001 | 1.82E-03 | 0.11  | transcription factor iws1                                                   |
| TERG_05245 | E001 | 4.24E-05 | 0.35  | hypothetical protein                                                        |
| TERG_05245 | E003 | 2.73E-07 | -0.25 | hypothetical protein                                                        |
| TERG_05299 | E001 | 2.77E-04 | -0.13 | glutathione S-transferase, putative ( <i>A. benhamiae</i> )                 |
| TERG_05299 | E002 | 1.26E-03 | 0.52  | glutathione S-transferase, putative ( <i>A. benhamiae</i> )                 |
| TERG_05333 | E001 | 1.71E-03 | 0.06  | DDT domain-containing protein ( <i>T. tonsurans</i> )                       |
| TERG_05333 | E002 | 1.83E-03 | -0.09 | DDT domain-containing protein ( <i>T. tonsurans</i> )                       |
| TERG_05361 | E001 | 2.78E-03 | 0.08  | cript family protein ( <i>T. tonsurans</i> )                                |
| TERG_05361 | E003 | 2.19E-03 | -0.65 | cript family protein ( <i>T. tonsurans</i> )                                |
| TERG_05382 | E001 | 8.56E-03 | 0.10  | sorting nexin Mvp1 ( <i>T. tonsurans</i> )                                  |
| TERG_05398 | E001 | 2.33E-02 | -0.13 | SNF7 family protein ( <i>T. tonsurans</i> )                                 |
| TERG_05398 | E002 | 1.89E-02 | 0.05  | SNF7 family protein ( <i>T. tonsurans</i> )                                 |
| TERG_05424 | E001 | 2.74E-02 | 0.27  | hypothetical protein                                                        |
| TERG_05452 | E001 | 6.06E-03 | 0.74  | GABA permease ( <i>T. tonsurans</i> )                                       |
| TERG_05484 | E006 | 1.43E-03 | -1.56 | acyl-CoA dehydrogenase ( <i>T. tonsurans</i> )                              |
| TERG_05484 | E008 | 1.12E-05 | -0.42 | acyl-CoA dehydrogenase ( <i>T. tonsurans</i> )                              |
| TERG_05509 | E002 | 4.40E-02 | 0.53  | aldehyde dehydrogenase ALDH ( <i>A. benhamiae</i> )                         |
| TERG_05540 | E001 | 9.81E-03 | 0.46  | cytochrome P450 monooxygenase, putative ( <i>T. verrucosum</i> )            |
| TERG_05562 | E003 | 2.25E-02 | 0.19  | 2-hydroxychromene-2-carboxylate isomerase, putative ( <i>A. benhamiae</i> ) |
| TERG_05562 | E006 | 5.56E-03 | -0.79 | 2-hydroxychromene-2-carboxylate isomerase, putative ( <i>A. benhamiae</i> ) |
| TERG_05569 | E005 | 1.34E-09 | -0.61 | hypothetical protein                                                        |
| TERG_05569 | E006 | 1.82E-12 | -1.28 | hypothetical protein                                                        |
| TERG_05575 | E001 | 1.67E-02 | 0.03  | MFS multidrug transporter ( <i>T. tonsurans</i> )                           |
| TERG_05575 | E006 | 3.58E-02 | -0.20 | MFS multidrug transporter ( <i>T. tonsurans</i> )                           |
| TERG_05576 | E001 | 7.83E-04 | -0.04 | cell wall glucanase (Scw11), putative ( <i>A. benhamiae</i> )               |
| TERG_05576 | E002 | 9.26E-04 | 0.10  | cell wall glucanase (Scw11), putative ( <i>A. benhamiae</i> )               |
| TERG_05647 | E004 | 3.77E-02 | 0.08  | protein kinase activator Bem1 ( <i>T. equinum</i> )                         |
| TERG_05659 | E008 | 3.69E-02 | 0.33  | hypothetical protein                                                        |
| TERG_05673 | E003 | 2.68E-02 | 0.45  | Paal-thioesterase ( <i>T. equinum</i> )                                     |

|            |      |          |       |                                                                                                                                   |
|------------|------|----------|-------|-----------------------------------------------------------------------------------------------------------------------------------|
| TERG_05679 | E006 | 3.80E-02 | -0.75 | 3-hydroxyacyl-CoA dehydrogenase, putative ( <i>A. benhamiae</i> )                                                                 |
| TERG_05703 | E001 | 4.83E-02 | 0.24  | ATP-dependent RNA helicase A ( <i>M. gypseum</i> )                                                                                |
| TERG_05703 | E002 | 3.42E-02 | -0.04 | ATP-dependent RNA helicase A ( <i>M. gypseum</i> )                                                                                |
| TERG_05787 | E001 | 6.93E-03 | 0.25  | COP9 signalosome complex subunit 12 ( <i>T. equinum</i> )                                                                         |
| TERG_05808 | E001 | 1.05E-04 | -0.08 | hypothetical protein                                                                                                              |
| TERG_05808 | E004 | 1.91E-05 | 0.15  | hypothetical protein                                                                                                              |
| TERG_05846 | E008 | 1.61E-02 | 0.19  | G1/S-specific cyclin CLN1 ( <i>T. equinum</i> )                                                                                   |
| TERG_05885 | E004 | 1.94E-04 | 0.78  | DnaJ domain-containing protein ( <i>T. equinum</i> )                                                                              |
| TERG_05885 | E007 | 3.98E-04 | 0.00  | DnaJ domain-containing protein ( <i>T. equinum</i> )                                                                              |
| TERG_05885 | E009 | 1.07E-02 | -0.19 | DnaJ domain-containing protein ( <i>T. equinum</i> )                                                                              |
| TERG_05892 | E002 | 1.39E-02 | 0.07  | hypothetical protein                                                                                                              |
| TERG_05892 | E003 | 3.85E-03 | -0.10 | hypothetical protein                                                                                                              |
| TERG_05925 | E008 | 1.35E-07 | 0.66  | EF-hand protein ( <i>T. tonsurans</i> )                                                                                           |
| TERG_05930 | E003 | 3.42E-02 | -0.70 | 5-formyltetrahydrofolate cyclo-ligase                                                                                             |
| TERG_05957 | E001 | 3.42E-02 | 0.08  | hypothetical protein                                                                                                              |
| TERG_05971 | E004 | 9.53E-03 | -0.09 | ribonucleoside-diphosphate reductase small chain solid-state culture expressed protein (Aos23), putative ( <i>T. verrucosum</i> ) |
| TERG_05988 | E001 | 3.84E-02 | -0.22 | putative ( <i>T. verrucosum</i> )                                                                                                 |
| TERG_06004 | E001 | 1.38E-02 | 0.06  | hypothetical protein                                                                                                              |
| TERG_06004 | E002 | 1.99E-02 | -0.25 | hypothetical protein                                                                                                              |
| TERG_06005 | E003 | 4.29E-04 | -0.47 | hypothetical protein                                                                                                              |
| TERG_06075 | E006 | 2.64E-02 | 0.21  | isocitrate dehydrogenase [NADP], mitochondrial                                                                                    |
| TERG_06075 | E007 | 2.47E-09 | 0.89  | isocitrate dehydrogenase [NADP], mitochondrial                                                                                    |
| TERG_06075 | E008 | 1.50E-03 | 0.20  | isocitrate dehydrogenase [NADP], mitochondrial                                                                                    |
| TERG_06088 | E002 | 2.29E-02 | -0.10 | PH domain-containing protein ( <i>T. equinum</i> )                                                                                |
| TERG_06089 | E002 | 2.50E-02 | -1.18 | PH domain-containing protein ( <i>T. equinum</i> )                                                                                |
| TERG_06089 | E007 | 4.02E-03 | -0.29 | PH domain-containing protein ( <i>T. equinum</i> )                                                                                |
| TERG_06095 | E001 | 4.05E-02 | -0.09 | hypothetical protein                                                                                                              |
| TERG_06095 | E002 | 4.44E-02 | 0.12  | hypothetical protein                                                                                                              |
| TERG_06098 | E002 | 1.89E-02 | -0.12 | selenoprotein W family protein ( <i>T. equinum</i> )                                                                              |
| TERG_06098 | E003 | 2.66E-02 | 0.21  | selenoprotein W family protein ( <i>T. equinum</i> )                                                                              |
| TERG_06149 | E001 | 1.09E-06 | 0.10  | NIMA interactive protein ( <i>T. equinum</i> )                                                                                    |
| TERG_06149 | E003 | 1.97E-04 | -0.34 | NIMA interactive protein ( <i>T. equinum</i> )                                                                                    |
| TERG_06220 | E001 | 1.41E-03 | 0.28  | hypothetical protein                                                                                                              |
| TERG_06220 | E002 | 6.09E-04 | -0.06 | hypothetical protein                                                                                                              |
| TERG_06234 | E002 | 8.21E-04 | -0.70 | 2,5-diketo-D-gluconic acid reductase A ( <i>T. equinum</i> )                                                                      |
| TERG_06270 | E004 | 7.15E-03 | -0.24 | hypothetical protein                                                                                                              |
| TERG_06288 | E007 | 1.36E-02 | 1.64  | FACT complex subunit pob3                                                                                                         |
| TERG_06288 | E009 | 1.00E-02 | 1.31  | FACT complex subunit pob3                                                                                                         |
| TERG_06296 | E003 | 4.57E-02 | -0.37 | hypothetical protein                                                                                                              |
| TERG_06327 | E003 | 3.11E-04 | -1.20 | integral membrane protein ( <i>T. equinum</i> )                                                                                   |
| TERG_06328 | E001 | 4.94E-02 | 0.08  | AdoMet-dependent rRNA methyltransferase spb1                                                                                      |
| TERG_06328 | E002 | 4.46E-02 | -0.04 | AdoMet-dependent rRNA methyltransferase spb1 C6 zinc finger domain containing protein ( <i>T. equinum</i> )                       |
| TERG_06330 | E002 | 2.80E-02 | 0.15  |                                                                                                                                   |
| TERG_06344 | E007 | 5.70E-03 | -0.34 | V-type proton ATPase subunit D mRNA cleavage factor complex component Pcf11 ( <i>T. equinum</i> )                                 |
| TERG_06493 | E005 | 3.94E-02 | -0.23 |                                                                                                                                   |
| TERG_06505 | E006 | 2.87E-02 | 0.62  | hsp70-like protein                                                                                                                |

|            |      |          |       |                                                                                           |
|------------|------|----------|-------|-------------------------------------------------------------------------------------------|
| TERG_06513 | E008 | 6.29E-03 | 0.26  | chromosome segregation protein ( <i>T. tonsurans</i> )                                    |
| TERG_06522 | E003 | 4.83E-02 | -0.41 | FMN dependent dehydrogenase, putative ( <i>T. verrucosum</i> )                            |
| TERG_06528 | E001 | 5.82E-05 | 0.20  | Delta(24(24(1)))-sterol reductase ( <i>T. equinum</i> )                                   |
| TERG_06528 | E002 | 8.00E-04 | -0.25 | Delta(24(24(1)))-sterol reductase ( <i>T. equinum</i> )                                   |
| TERG_06552 | E007 | 1.26E-05 | 0.68  | aspartic-type endopeptidase (OpsB), putative ( <i>T. verrucosum</i> )                     |
| TERG_06565 | E003 | 4.94E-03 | 0.19  | protein kinase subdomain-containing protein ( <i>T. equinum</i> )                         |
| TERG_06565 | E005 | 4.05E-02 | -0.17 | protein kinase subdomain-containing protein ( <i>T. equinum</i> )                         |
| TERG_06618 | E001 | 1.51E-03 | 0.03  | mitochondrial GTPase ( <i>T. tonsurans</i> )                                              |
| TERG_06618 | E002 | 3.46E-03 | -0.38 | mitochondrial GTPase ( <i>T. tonsurans</i> )                                              |
| TERG_06622 | E001 | 2.08E-03 | -0.17 | hydrolase ( <i>T. tonsurans</i> )                                                         |
| TERG_06652 | E003 | 8.62E-03 | -0.32 | Amt4 ( <i>T. equinum</i> )                                                                |
| TERG_06668 | E006 | 2.88E-02 | 0.09  | DUF221 domain-containing protein ( <i>T. equinum</i> )                                    |
| TERG_06686 | E001 | 1.92E-03 | 0.04  | hypothetical protein                                                                      |
| TERG_06686 | E007 | 2.47E-12 | -0.89 | hypothetical protein                                                                      |
| TERG_06725 | E001 | 9.08E-04 | 0.44  | non-histone chromosomal protein 6                                                         |
| TERG_06749 | E001 | 4.38E-09 | -0.53 | cell wall protein, putative ( <i>A. benhamiae</i> )                                       |
| TERG_06749 | E002 | 2.09E-18 | -0.40 | cell wall protein, putative ( <i>A. benhamiae</i> )                                       |
| TERG_06749 | E003 | 4.23E-15 | 0.25  | cell wall protein, putative ( <i>A. benhamiae</i> )                                       |
| TERG_06759 | E003 | 1.40E-02 | -0.36 | C2H2 transcription factor (Seb1), putative ( <i>A. benhamiae</i> )                        |
| TERG_06844 | E002 | 1.42E-03 | -0.66 | 40S ribosomal protein S21                                                                 |
| TERG_07005 | E001 | 6.69E-03 | -0.09 | PAB-dependent poly(A)-specific ribonuclease subunit PAN3 ( <i>T. tonsurans</i> )          |
| TERG_07005 | E004 | 4.94E-03 | 0.09  | PAB-dependent poly(A)-specific ribonuclease subunit PAN3 ( <i>T. tonsurans</i> )          |
| TERG_07058 | E003 | 6.84E-08 | -0.30 | Hsp70 family chaperone, putative ( <i>A. benhamiae</i> )                                  |
| TERG_07058 | E004 | 1.50E-02 | 0.00  | Hsp70 family chaperone, putative ( <i>A. benhamiae</i> )                                  |
| TERG_07058 | E005 | 8.42E-04 | -0.28 | Hsp70 family chaperone, putative ( <i>A. benhamiae</i> )                                  |
| TERG_07131 | E001 | 3.39E-04 | 0.07  | phosphotransmitter protein Ypd1 ( <i>T. equinum</i> )                                     |
| TERG_07131 | E003 | 1.56E-02 | -0.23 | phosphotransmitter protein Ypd1 ( <i>T. equinum</i> )                                     |
| TERG_07136 | E001 | 9.09E-12 | 0.19  | <i>A. benhamiae</i> Rab geranylgeranyltransferase, beta subunit (1826 nt)                 |
| TERG_07136 | E005 | 3.01E-02 | -0.24 | <i>A. benhamiae</i> Rab geranylgeranyltransferase, beta subunit (1826 nt)                 |
| TERG_07136 | E006 | 9.91E-03 | -0.15 | <i>A. benhamiae</i> Rab geranylgeranyltransferase, beta subunit (1826 nt)                 |
| TERG_07143 | E001 | 6.82E-12 | -0.56 | potassium/sodium efflux P-type ATPase, fungal-type (3762 nt)                              |
| TERG_07159 | E008 | 1.60E-05 | 0.24  | <i>T. verrucosum</i> geranylgeranyl transferase type II alpha subunit, putative (1295 nt) |
| TERG_07241 | E001 | 1.26E-03 | 0.21  | saccharopine dehydrogenase [NADP+, L-glutamate-forming] (2357 nt)                         |
| TERG_07274 | E001 | 1.19E-02 | 0.02  | hypothetical protein (3330 nt)                                                            |
| TERG_07406 | E007 | 4.95E-02 | 0.28  | <i>T. tonsurans</i> alpha-mannosidase (2057 nt)                                           |
| TERG_07431 | E002 | 1.15E-02 | -0.80 | <i>A. benhamiae</i> DnaJ domain protein (3397 nt)                                         |
| TERG_07457 | E001 | 3.55E-03 | -0.55 | histidinol-phosphate transaminase (3837 nt)                                               |
| TERG_07457 | E005 | 2.40E-07 | 0.23  | histidinol-phosphate transaminase (3837 nt)                                               |
| TERG_07468 | E001 | 2.01E-10 | 0.19  | hypothetical protein (2508 nt)                                                            |
| TERG_07468 | E003 | 1.95E-10 | -0.24 | hypothetical protein (2508 nt)                                                            |
| TERG_07534 | E004 | 4.28E-05 | -0.31 | NADH-ubiquinone oxidoreductase complex 1/LYR family protein ( <i>M. gypseum</i> )         |

|            |      |          |       |                                                                              |
|------------|------|----------|-------|------------------------------------------------------------------------------|
| TERG_07583 | E001 | 2.67E-02 | 0.35  | methionyl-tRNA formyltransferase ( <i>T. tonsurans</i> )                     |
|            |      |          |       | FMN dependent dehydrogenase, putative ( <i>T. verrucosum</i> )               |
| TERG_07630 | E003 | 4.62E-02 | 0.57  | <i>verrucosum</i> )                                                          |
| TERG_07658 | E004 | 1.27E-02 | 1.06  | hsp88-like protein ( <i>T. tonsurans</i> )                                   |
| TERG_07658 | E010 | 1.45E-02 | 0.51  | hsp88-like protein ( <i>T. tonsurans</i> )                                   |
| TERG_07785 | E002 | 3.42E-05 | 0.13  | SNARE domain-containing protein ( <i>T. tonsurans</i> )                      |
| TERG_07785 | E003 | 8.57E-09 | -0.32 | SNARE domain-containing protein ( <i>T. tonsurans</i> )                      |
| TERG_07814 | E001 | 4.35E-02 | 0.09  | isocitrate dehydrogenase, NAD-dependent                                      |
| TERG_07834 | E001 | 1.99E-02 | -0.36 | alpha-actinin ( <i>T. equinum</i> )                                          |
| TERG_07834 | E002 | 8.76E-04 | -0.17 | alpha-actinin ( <i>T. equinum</i> )                                          |
| TERG_07834 | E004 | 2.98E-07 | 0.09  | alpha-actinin ( <i>T. equinum</i> )                                          |
| TERG_07868 | E001 | 4.67E-02 | -0.66 | V-type proton ATPase proteolipid subunit 2                                   |
| TERG_07916 | E001 | 2.54E-02 | 0.43  | calcium-translocating P-type ATPase, PMCA-type                               |
| TERG_07919 | E001 | 3.57E-11 | -1.01 | thioesterase family protein ( <i>T. verrucosum</i> )                         |
| TERG_07919 | E003 | 3.30E-04 | 0.07  | thioesterase family protein ( <i>T. verrucosum</i> )                         |
| TERG_07937 | E001 | 1.85E-15 | -0.47 | G-patch domain-containing protein ( <i>T. equinum</i> )                      |
| TERG_07937 | E002 | 2.57E-16 | 0.08  | G-patch domain-containing protein ( <i>T. equinum</i> )                      |
| TERG_07943 | E001 | 2.38E-02 | 0.09  | hypothetical protein                                                         |
| TERG_07943 | E002 | 1.81E-02 | -0.04 | hypothetical protein                                                         |
| TERG_07997 | E008 | 1.44E-02 | -0.38 | acetamidase ( <i>T. tonsurans</i> )                                          |
| TERG_07999 | E001 | 2.50E-05 | -0.18 | hypothetical protein                                                         |
| TERG_07999 | E002 | 4.94E-05 | 0.39  | hypothetical protein                                                         |
|            |      |          |       | PHD finger domain-containing protein ( <i>T. equinum</i> )                   |
| TERG_08031 | E001 | 1.85E-04 | 0.13  | <i>equinum</i> )                                                             |
|            |      |          |       | polysaccharide deacetylase family protein ( <i>T. equinum</i> )              |
| TERG_08038 | E001 | 5.59E-09 | 0.25  | <i>equinum</i> )                                                             |
|            |      |          |       | polysaccharide deacetylase family protein ( <i>T. equinum</i> )              |
| TERG_08038 | E004 | 1.67E-12 | -0.52 | <i>equinum</i> )                                                             |
| TERG_08041 | E001 | 2.68E-02 | 0.09  | aminotransferase, putative ( <i>A. benhamiae</i> )                           |
| TERG_08083 | E001 | 4.91E-02 | 0.16  | importin subunit beta-2 ( <i>T. equinum</i> )                                |
| TERG_08083 | E003 | 9.91E-03 | -0.06 | importin subunit beta-2 ( <i>T. equinum</i> )                                |
|            |      |          |       | glucose-inducible SAM-dependent methyltransferase Rrg1 ( <i>T. equinum</i> ) |
| TERG_08120 | E001 | 5.94E-03 | -0.19 | methyltransferase Rrg1 ( <i>T. equinum</i> )                                 |
| TERG_08152 | E001 | 3.42E-05 | 0.14  | O-methyltransferase ( <i>T. equinum</i> )                                    |
| TERG_08152 | E002 | 2.38E-03 | -0.18 | O-methyltransferase ( <i>T. equinum</i> )                                    |
| TERG_08152 | E004 | 4.72E-10 | -0.16 | O-methyltransferase ( <i>T. equinum</i> )                                    |
| TERG_08191 | E001 | 2.95E-02 | 0.28  | glucooligosaccharide oxidase ( <i>T. equinum</i> )                           |
| TERG_08200 | E001 | 1.46E-02 | 1.36  | hypothetical protein                                                         |
| TERG_08255 | E001 | 2.18E-05 | -0.10 | carboxypeptidase S1, putative ( <i>A. benhamiae</i> )                        |
| TERG_08255 | E002 | 4.55E-07 | 0.17  | carboxypeptidase S1, putative ( <i>A. benhamiae</i> )                        |
| TERG_08288 | E002 | 1.03E-02 | -0.08 | ATP-citrate synthase subunit 1                                               |
|            |      |          |       | multidrug resistance-associated protein 1                                    |
| TERG_08299 | E001 | 2.01E-06 | -0.44 | transporter ( <i>M. canis</i> )                                              |
| TERG_08304 | E001 | 1.94E-02 | 0.05  | hypothetical protein                                                         |
| TERG_08304 | E002 | 3.20E-02 | -0.29 | hypothetical protein                                                         |
| TERG_08329 | E001 | 3.99E-06 | -0.07 | flavin containing amine oxidase ( <i>T. tonsurans</i> )                      |
| TERG_08329 | E003 | 1.64E-06 | 0.47  | flavin containing amine oxidase ( <i>T. tonsurans</i> )                      |
| TERG_08340 | E002 | 5.09E-03 | -0.92 | F-box domain-containing protein ( <i>T. equinum</i> )                        |
| TERG_08341 | E002 | 3.83E-02 | -0.21 | hypothetical protein                                                         |
| TERG_08353 | E004 | 5.47E-03 | -1.05 | cytochrome P450 55A3 ( <i>T. tonsurans</i> )                                 |
| TERG_08353 | E011 | 4.08E-02 | -0.74 | cytochrome P450 55A3 ( <i>T. tonsurans</i> )                                 |

|            |      |          |       |                                                                                                                           |
|------------|------|----------|-------|---------------------------------------------------------------------------------------------------------------------------|
| TERG_08355 | E005 | 8.27E-03 | -0.26 | zinc alcohol dehydrogenase, putative ( <i>T. verrucosum</i> )                                                             |
| TERG_08378 | E003 | 8.10E-03 | -0.10 | hypothetical protein                                                                                                      |
| TERG_08405 | E004 | 3.20E-02 | -0.09 | leucine aminopeptidase 2                                                                                                  |
| TERG_08473 | E003 | 4.66E-02 | 0.10  | hypothetical protein                                                                                                      |
| TERG_08481 | E002 | 6.93E-03 | 0.10  | ubiquitin C-terminal hydrolase ( <i>T. tonsurans</i> )                                                                    |
| TERG_08481 | E003 | 3.14E-03 | -0.09 | ubiquitin C-terminal hydrolase ( <i>T. tonsurans</i> )                                                                    |
| TERG_08555 | E004 | 3.66E-03 | -0.26 | nuclear pore protein ( <i>T. equinum</i> )                                                                                |
| TERG_08557 | E001 | 2.24E-02 | 0.07  | carboxypeptidase S1, putative ( <i>A. benhamiae</i> )                                                                     |
| TERG_08615 | E004 | 1.86E-02 | -0.30 | MFS transporter, putative ( <i>T. verrucosum</i> )<br>extracellular serine-threonine rich protein ( <i>T. tonsurans</i> ) |
| TERG_08771 | E004 | 3.89E-02 | -0.12 | GPI-anchored cell surface glycoprotein, putative ( <i>T. verrucosum</i> )                                                 |
| TERG_08884 | E004 | 1.20E-02 | -0.16 | GPI-anchored cell surface glycoprotein, putative ( <i>T. verrucosum</i> )                                                 |
| TERG_08884 | E005 | 3.70E-02 | -0.41 | GPI-anchored cell surface glycoprotein, putative ( <i>T. verrucosum</i> )                                                 |
| TERG_08884 | E006 | 1.02E-02 | -0.60 | GPI-anchored cell surface glycoprotein, putative ( <i>T. verrucosum</i> )                                                 |
| TERG_08906 | E001 | 3.70E-02 | 0.34  | hypothetical protein                                                                                                      |
| TERG_08906 | E002 | 2.26E-02 | -0.13 | hypothetical protein                                                                                                      |
| TERG_08980 | E001 | 1.81E-02 | 1.32  | hypothetical protein                                                                                                      |
| TERG_08982 | E001 | 5.73E-04 | 0.24  | hypothetical protein                                                                                                      |
| TERG_08982 | E002 | 4.16E-04 | -0.19 | hypothetical protein<br>General negative regulator of transcription subunit 4 ( <i>T. tonsurans</i> )                     |
| TERG_11512 | E001 | 2.42E-02 | 0.10  | 4 ( <i>T. tonsurans</i> )                                                                                                 |
| TERG_11540 | E001 | 2.71E-04 | -0.06 | hypothetical protein                                                                                                      |
| TERG_11540 | E002 | 8.63E-04 | 0.54  | hypothetical protein                                                                                                      |
| TERG_11660 | E001 | 4.07E-03 | 0.10  | mitochondrial 40S ribosomal protein ( <i>T. tonsurans</i> )                                                               |
| TERG_11660 | E002 | 1.34E-07 | 0.11  | mitochondrial 40S ribosomal protein ( <i>T. tonsurans</i> )                                                               |
| TERG_11660 | E003 | 2.73E-07 | 0.19  | mitochondrial 40S ribosomal protein ( <i>T. tonsurans</i> )                                                               |
| TERG_11660 | E004 | 6.32E-16 | -0.93 | mitochondrial 40S ribosomal protein ( <i>T. tonsurans</i> )                                                               |
| TERG_11660 | E005 | 1.58E-09 | -0.70 | mitochondrial 40S ribosomal protein ( <i>T. tonsurans</i> )                                                               |
| TERG_11660 | E006 | 1.16E-27 | -0.63 | mitochondrial 40S ribosomal protein ( <i>T. tonsurans</i> )                                                               |
| TERG_11660 | E007 | 9.71E-18 | -0.60 | mitochondrial 40S ribosomal protein ( <i>T. tonsurans</i> )                                                               |
| TERG_11688 | E001 | 1.87E-04 | -0.18 | nitrilase ( <i>T. tonsurans</i> )                                                                                         |
| TERG_11787 | E001 | 1.89E-02 | -0.10 | oligosaccharyl transferase stt3 subunit ( <i>T. equinum</i> )                                                             |
| TERG_11787 | E003 | 1.73E-02 | 0.09  | oligosaccharyl transferase stt3 subunit ( <i>T. equinum</i> )                                                             |
| TERG_11862 | E001 | 7.10E-07 | -0.44 | integral membrane protein ( <i>T. tonsurans</i> )                                                                         |
| TERG_11862 | E004 | 8.06E-03 | -0.32 | integral membrane protein ( <i>T. tonsurans</i> )                                                                         |
| TERG_11862 | E005 | 5.96E-03 | -0.27 | integral membrane protein ( <i>T. tonsurans</i> )                                                                         |
| TERG_11862 | E007 | 8.71E-09 | 0.08  | integral membrane protein ( <i>T. tonsurans</i> )                                                                         |
| TERG_11871 | E001 | 2.14E-02 | 0.46  | ubiquitin C-terminal hydrolase 37 ( <i>T. verrucosum</i> )                                                                |
| TERG_11871 | E002 | 3.64E-03 | 0.26  | ubiquitin C-terminal hydrolase 37 ( <i>T. verrucosum</i> )                                                                |
| TERG_11871 | E005 | 5.47E-03 | -0.36 | ubiquitin C-terminal hydrolase 37 ( <i>T. verrucosum</i> )                                                                |
| TERG_11879 | E001 | 1.38E-02 | -0.20 | hypothetical protein                                                                                                      |
| TERG_11879 | E002 | 9.89E-03 | 0.05  | hypothetical protein                                                                                                      |
| TERG_11991 | E003 | 6.59E-03 | 0.75  | hypothetical protein                                                                                                      |

|            |      |          |       |                                                                   |
|------------|------|----------|-------|-------------------------------------------------------------------|
| TERG_12000 | E007 | 4.96E-02 | 0.24  | ubiquitin C-terminal hydrolase, putative ( <i>T. verrucosum</i> ) |
| TERG_12004 | E001 | 9.77E-26 | 0.18  | lipase ( <i>T. tonsurans</i> )                                    |
| TERG_12004 | E003 | 9.50E-05 | -0.21 | lipase ( <i>T. tonsurans</i> )                                    |
| TERG_12004 | E004 | 1.86E-04 | -0.23 | lipase ( <i>T. tonsurans</i> )                                    |
| TERG_12012 | E001 | 4.15E-08 | -0.35 | hypothetical protein                                              |
| TERG_12012 | E003 | 1.60E-12 | 0.31  | hypothetical protein                                              |
| TERG_12030 | E004 | 8.97E-03 | 0.57  | DUF821 domain protein ( <i>T. verrucosum</i> )                    |
| TERG_12154 | E003 | 1.75E-02 | -0.18 | leukotriene A4 hydrolase ( <i>T. verrucosum</i> )                 |
| TERG_12154 | E004 | 7.15E-03 | -0.18 | leukotriene A4 hydrolase ( <i>T. verrucosum</i> )                 |
| TERG_12154 | E006 | 5.03E-03 | -0.26 | leukotriene A4 hydrolase ( <i>T. verrucosum</i> )                 |
| TERG_12154 | E008 | 8.45E-08 | -0.21 | leukotriene A4 hydrolase ( <i>T. verrucosum</i> )                 |
| TERG_12154 | E009 | 1.27E-02 | -0.18 | leukotriene A4 hydrolase ( <i>T. verrucosum</i> )                 |
| TERG_12154 | E014 | 3.42E-08 | 0.12  | leukotriene A4 hydrolase ( <i>T. verrucosum</i> )                 |
| TERG_12154 | E015 | 1.18E-09 | 0.16  | leukotriene A4 hydrolase ( <i>T. verrucosum</i> )                 |
| TERG_12154 | E016 | 8.16E-11 | 0.11  | leukotriene A4 hydrolase ( <i>T. verrucosum</i> )                 |
| TERG_12154 | E017 | 5.79E-05 | 0.13  | leukotriene A4 hydrolase ( <i>T. verrucosum</i> )                 |
| TERG_12164 | E001 | 1.51E-04 | 0.47  | hypothetical protein                                              |
| TERG_12164 | E003 | 9.08E-05 | -0.12 | hypothetical protein                                              |
| TERG_12234 | E004 | 1.06E-05 | 0.47  | pantoate-beta-alanine ligase                                      |
| TERG_12308 | E004 | 1.70E-02 | -0.23 | transcriptional repressor Sin3p ( <i>T. equinum</i> )             |
| TERG_12335 | E005 | 4.53E-02 | 0.46  | proliferating cell nuclear antigen (pcna)                         |
| TERG_12335 | E009 | 3.54E-07 | -0.09 | proliferating cell nuclear antigen (pcna)                         |
| TERG_12351 | E001 | 1.11E-05 | -0.90 | hypothetical protein                                              |
| TERG_12351 | E002 | 1.91E-06 | 0.05  | hypothetical protein                                              |
| TERG_12367 | E001 | 3.67E-10 | 0.62  | 60S acidic ribosomal protein P0                                   |
| TERG_12367 | E002 | 4.71E-10 | 0.68  | 60S acidic ribosomal protein P0                                   |
| TERG_12367 | E003 | 1.74E-12 | 0.71  | 60S acidic ribosomal protein P0                                   |
| TERG_12367 | E004 | 1.01E-08 | 0.68  | 60S acidic ribosomal protein P0                                   |
| TERG_12367 | E005 | 5.00E-02 | -0.18 | 60S acidic ribosomal protein P0                                   |
| TERG_12367 | E006 | 2.41E-04 | -0.21 | 60S acidic ribosomal protein P0                                   |
| TERG_12367 | E007 | 1.88E-07 | -0.20 | 60S acidic ribosomal protein P0                                   |
| TERG_12499 | E002 | 4.64E-02 | 0.12  | 2-deoxy-D-gluconate 3-dehydrogenase ( <i>T. equinum</i> )         |
| TERG_12572 | E001 | 1.53E-02 | -0.55 | acyl-coenzyme A thioesterase ( <i>T. equinum</i> )                |
| TERG_12572 | E004 | 3.08E-02 | -0.36 | acyl-coenzyme A thioesterase ( <i>T. equinum</i> )                |
| TERG_12572 | E005 | 7.35E-12 | -0.50 | acyl-coenzyme A thioesterase ( <i>T. equinum</i> )                |
| TERG_12572 | E007 | 1.73E-02 | 0.11  | acyl-coenzyme A thioesterase ( <i>T. equinum</i> )                |
| TERG_12572 | E009 | 1.02E-06 | 0.25  | acyl-coenzyme A thioesterase ( <i>T. equinum</i> )                |
| TERG_12591 | E003 | 1.26E-03 | 0.14  | peptidase S8 family protein ( <i>T. equinum</i> )                 |
| TERG_12591 | E004 | 4.02E-03 | -0.45 | peptidase S8 family protein ( <i>T. equinum</i> )                 |
| TERG_12680 | E001 | 3.24E-02 | 0.10  | alpha-mannosidase ( <i>T. tonsurans</i> )                         |
| TERG_12680 | E002 | 2.95E-02 | -0.07 | alpha-mannosidase ( <i>T. tonsurans</i> )                         |

Total genes = 302, Differential exon usage = 513.

Gene expression values are expressed in log<sub>2</sub> fold change between each time point.

### 12 hours vs. 0 hour

| ID | Exon | padj | 12-0 hours | Gene Product Name |
|----|------|------|------------|-------------------|
|----|------|------|------------|-------------------|

|            |      |          |       |                                                                                                              |
|------------|------|----------|-------|--------------------------------------------------------------------------------------------------------------|
| TERG_00049 | E001 | 2.22E-03 | 0.17  | hypothetical protein                                                                                         |
| TERG_00049 | E005 | 1.27E-02 | -0.27 | hypothetical protein                                                                                         |
| TERG_00098 | E001 | 1.80E-02 | 0.28  | high affinity methionine permease ( <i>A. benhamiae</i> )                                                    |
| TERG_00098 | E006 | 1.99E-02 | -0.45 | high affinity methionine permease ( <i>A. benhamiae</i> )<br>ribonuclease P complex subunit Pop1 ( <i>T.</i> |
| TERG_00122 | E004 | 1.30E-02 | 0.11  | <i>tonsurans</i> )                                                                                           |
| TERG_00124 | E003 | 8.49E-08 | -0.01 | peroxisomal matrix protein ( <i>T. equinum</i> )                                                             |
| TERG_00138 | E002 | 3.80E-02 | 6.30  | tetraspanin ( <i>T. equinum</i> )<br>mitochondrial inner membrane magnesium                                  |
| TERG_00152 | E001 | 4.41E-02 | 0.24  | transporter mrs2 ( <i>T. tonsurans</i> )                                                                     |
| TERG_00181 | E001 | 1.34E-03 | -0.05 | nucleolar protein 58                                                                                         |
| TERG_00181 | E002 | 1.70E-04 | -0.25 | nucleolar protein 58                                                                                         |
| TERG_00181 | E005 | 2.61E-08 | 0.14  | nucleolar protein 58<br>pathogenesis associated protein Cap20, putative                                      |
| TERG_00243 | E001 | 3.91E-06 | 0.79  | ( <i>T. verrucosum</i> )                                                                                     |
| TERG_00250 | E003 | 1.64E-04 | 2.49  | phosphoacetylglucosamine mutase ( <i>T. equinum</i> )                                                        |
| TERG_00332 | E005 | 4.48E-37 | -0.43 | nuclear transport factor 2                                                                                   |
| TERG_00332 | E006 | 3.87E-02 | -0.35 | nuclear transport factor 2                                                                                   |
| TERG_00369 | E002 | 4.40E-02 | 0.11  | branchpoint-bridging protein                                                                                 |
| TERG_00536 | E001 | 4.69E-02 | 0.12  | D-galacturonic acid reductase ( <i>T. equinum</i> )<br>potassium/sodium efflux P-type ATPase, fungal-        |
| TERG_00616 | E007 | 9.77E-05 | -0.89 | type                                                                                                         |
| TERG_00659 | E002 | 2.37E-03 | -0.87 | 3-deoxy-7-phosphoheptulonate synthase                                                                        |
| TERG_00659 | E004 | 3.89E-03 | -1.11 | 3-deoxy-7-phosphoheptulonate synthase                                                                        |
| TERG_00703 | E001 | 3.12E-02 | 0.12  | nuclear migration protein, putative ( <i>A. benhamiae</i> )                                                  |
| TERG_00703 | E002 | 3.01E-02 | -0.09 | nuclear migration protein, putative ( <i>A. benhamiae</i> )                                                  |
| TERG_00706 | E001 | 5.23E-03 | 0.06  | MFS transporter ( <i>T. verrucosum</i> )                                                                     |
| TERG_00706 | E002 | 6.28E-03 | -0.18 | MFS transporter ( <i>T. verrucosum</i> )                                                                     |
| TERG_00831 | E001 | 4.35E-02 | -0.32 | gamma-glutamyltransferase                                                                                    |
| TERG_00831 | E003 | 3.47E-02 | -0.13 | gamma-glutamyltransferase                                                                                    |
| TERG_00831 | E005 | 2.29E-03 | 0.09  | gamma-glutamyltransferase                                                                                    |
| TERG_00841 | E004 | 1.95E-02 | -0.14 | C6 transcription factor, putative ( <i>T. verrucosum</i> )                                                   |
| TERG_00849 | E005 | 4.41E-02 | -0.40 | inner membrane protein yicO ( <i>T. tonsurans</i> )                                                          |
| TERG_00863 | E001 | 3.50E-03 | -0.15 | NsdD ( <i>T. equinum</i> )                                                                                   |
| TERG_00865 | E002 | 1.68E-02 | -0.52 | hypothetical protein                                                                                         |
| TERG_00865 | E007 | 2.83E-06 | -0.26 | hypothetical protein                                                                                         |
| TERG_00865 | E008 | 3.31E-02 | -0.83 | hypothetical protein                                                                                         |
| TERG_00961 | E002 | 4.44E-02 | -0.06 | T-complex protein 1, zeta subunit                                                                            |
| TERG_01012 | E001 | 2.67E-04 | -0.21 | hypothetical protein                                                                                         |
| TERG_01012 | E002 | 7.25E-04 | 0.73  | hypothetical protein                                                                                         |
| TERG_01012 | E003 | 6.11E-03 | 0.85  | hypothetical protein                                                                                         |
| TERG_01012 | E004 | 1.59E-02 | 0.28  | hypothetical protein                                                                                         |
| TERG_01029 | E001 | 2.76E-02 | 0.07  | phosducin family protein ( <i>T. tonsurans</i> )                                                             |
| TERG_01039 | E001 | 3.11E-02 | 0.17  | DNA topoisomerase III ( <i>T. tonsurans</i> )                                                                |
| TERG_01048 | E001 | 1.82E-02 | 0.11  | WSC domain protein, putative ( <i>T. verrucosum</i> )                                                        |
| TERG_01076 | E001 | 1.41E-10 | -0.47 | aconitate hydratase, mitochondrial                                                                           |
| TERG_01076 | E007 | 8.02E-07 | 0.08  | aconitate hydratase, mitochondrial                                                                           |
| TERG_01198 | E003 | 7.01E-18 | -0.11 | pre-mRNA-splicing factor rse1                                                                                |
| TERG_01198 | E006 | 8.48E-15 | 0.28  | pre-mRNA-splicing factor rse1<br>signal sequence receptor alpha subunit ( <i>T.</i>                          |
| TERG_01254 | E003 | 1.71E-02 | 0.11  | <i>tonsurans</i> )                                                                                           |

|            |      |          |       |                                                                                       |
|------------|------|----------|-------|---------------------------------------------------------------------------------------|
| TERG_01274 | E003 | 2.61E-04 | 1.12  | mRNA export factor elf1 ( <i>T. equinum</i> )                                         |
| TERG_01274 | E004 | 3.36E-02 | 0.07  | mRNA export factor elf1 ( <i>T. equinum</i> )                                         |
| TERG_01279 | E002 | 3.78E-03 | -0.70 | flavin-binding monooxygenase ( <i>T. equinum</i> )                                    |
| TERG_01279 | E007 | 1.56E-05 | 0.28  | flavin-binding monooxygenase ( <i>T. equinum</i> )                                    |
| TERG_01292 | E001 | 5.13E-03 | -0.12 | glycosyl hydrolase, putative ( <i>A. benhamiae</i> )                                  |
| TERG_01334 | E004 | 5.53E-03 | -0.74 | C6 finger domain protein, putative ( <i>A. benhamiae</i> )                            |
| TERG_01360 | E004 | 1.51E-04 | -1.22 | C6 transcription factor, putative ( <i>T. verrucosum</i> )                            |
| TERG_01360 | E006 | 2.01E-03 | -1.22 | C6 transcription factor, putative ( <i>T. verrucosum</i> )                            |
| TERG_01399 | E001 | 2.74E-02 | -1.48 | hypothetical protein                                                                  |
| TERG_01399 | E003 | 1.06E-02 | 0.01  | hypothetical protein                                                                  |
| TERG_01433 | E006 | 4.21E-03 | 0.12  | WD domain, G-beta repeat protein ( <i>A. benhamiae</i> )                              |
| TERG_01443 | E010 | 4.91E-04 | -0.12 | ABC multidrug transporter ( <i>T. tonsurans</i> )                                     |
| TERG_01444 | E001 | 7.36E-03 | 0.74  | nonribosomal peptide synthase Pes1 ( <i>A. benhamiae</i> )                            |
| TERG_01444 | E002 | 4.98E-03 | 0.91  | nonribosomal peptide synthase Pes1 ( <i>A. benhamiae</i> )                            |
| TERG_01444 | E003 | 2.08E-02 | 1.17  | nonribosomal peptide synthase Pes1 ( <i>A. benhamiae</i> )                            |
| TERG_01476 | E004 | 3.21E-02 | -0.27 | APSES transcription factor Xbp1 ( <i>T. equinum</i> )                                 |
| TERG_01481 | E004 | 5.53E-03 | 0.15  | MFS multidrug transporter, putative ( <i>A. benhamiae</i> )                           |
| TERG_01507 | E001 | 1.65E-05 | -0.06 | extracellular proline-glycine rich protein ( <i>T. verrucosum</i> )                   |
| TERG_01507 | E002 | 4.21E-03 | -0.61 | extracellular proline-glycine rich protein ( <i>T. verrucosum</i> )                   |
| TERG_01507 | E004 | 1.65E-02 | 0.11  | extracellular proline-glycine rich protein ( <i>T. verrucosum</i> )                   |
| TERG_01522 | E001 | 4.02E-02 | -0.05 | kinesin heavy chain                                                                   |
| TERG_01522 | E002 | 4.64E-02 | 0.24  | kinesin heavy chain                                                                   |
| TERG_01599 | E003 | 1.60E-02 | -0.28 | hypothetical protein                                                                  |
| TERG_01599 | E006 | 4.36E-43 | 1.54  | hypothetical protein                                                                  |
| TERG_01612 | E001 | 6.44E-03 | -0.09 | enolase                                                                               |
| TERG_01612 | E007 | 2.99E-03 | 0.04  | enolase                                                                               |
| TERG_01624 | E003 | 2.00E-03 | -0.03 | phosphomannomutase ( <i>T. tonsurans</i> )                                            |
| TERG_01749 | E003 | 1.13E-02 | 0.06  | hypothetical protein                                                                  |
| TERG_01819 | E001 | 1.24E-02 | 0.16  | protein CFT1                                                                          |
| TERG_01835 | E005 | 2.98E-02 | -0.33 | extracellular lipase, putative ( <i>T. verrucosum</i> )                               |
| TERG_01883 | E002 | 3.97E-02 | 0.04  | hsp75-like protein                                                                    |
| TERG_01892 | E004 | 2.96E-02 | -0.40 | alanyl-tRNA synthetase                                                                |
| TERG_01894 | E001 | 6.26E-03 | -0.11 | hypothetical protein                                                                  |
| TERG_01894 | E002 | 6.44E-03 | 0.17  | hypothetical protein                                                                  |
| TERG_01905 | E001 | 1.86E-02 | -0.07 | AMP deaminase                                                                         |
| TERG_01905 | E002 | 2.06E-02 | 0.16  | AMP deaminase                                                                         |
| TERG_01936 | E001 | 1.79E-03 | -0.28 | COP9 signalosome complex subunit 1 ( <i>T. equinum</i> )                              |
| TERG_01936 | E002 | 3.45E-03 | -0.04 | COP9 signalosome complex subunit 1 ( <i>T. equinum</i> )                              |
| TERG_01936 | E004 | 1.80E-02 | 0.06  | COP9 signalosome complex subunit 1 ( <i>T. equinum</i> )                              |
| TERG_01936 | E006 | 1.82E-08 | 0.19  | COP9 signalosome complex subunit 1 ( <i>T. equinum</i> )                              |
| TERG_01959 | E001 | 1.39E-03 | 0.25  | RNA polymerase Rpb1 C-terminal repeat domain-containing protein ( <i>T. equinum</i> ) |
| TERG_01959 | E002 | 1.30E-03 | -0.17 | RNA polymerase Rpb1 C-terminal repeat domain-containing protein ( <i>T. equinum</i> ) |



|            |      |          |       |                                                                                                                                          |
|------------|------|----------|-------|------------------------------------------------------------------------------------------------------------------------------------------|
| TERG_01988 | E003 | 2.01E-03 | -0.07 | F-box domain protein ( <i>A. benhamiae</i> )                                                                                             |
| TERG_02144 | E001 | 3.31E-02 | 0.08  | arsenite resistance protein Ars2 ( <i>T. equinum</i> )                                                                                   |
| TERG_02186 | E001 | 8.29E-03 | -0.22 | ABC multidrug transporter, putative ( <i>A. benhamiae</i> )                                                                              |
| TERG_02186 | E002 | 2.40E-02 | 0.31  | ABC multidrug transporter, putative ( <i>A. benhamiae</i> )                                                                              |
| TERG_02189 | E006 | 9.77E-05 | -2.27 | tubulin alpha-2 chain                                                                                                                    |
| TERG_02210 | E003 | 1.08E-03 | 0.20  | hypothetical protein                                                                                                                     |
| TERG_02222 | E001 | 1.51E-02 | 0.09  | TBC domain-containing protein ( <i>T. equinum</i> )                                                                                      |
| TERG_02222 | E004 | 6.26E-03 | -0.08 | TBC domain-containing protein ( <i>T. equinum</i> )                                                                                      |
| TERG_02237 | E001 | 9.77E-05 | -0.03 | 40S ribosomal protein S28                                                                                                                |
| TERG_02376 | E004 | 9.13E-10 | 0.02  | 60S ribosomal protein ( <i>T. equinum</i> )                                                                                              |
| TERG_02418 | E001 | 1.86E-02 | -0.05 | translation initiation factor SUI1                                                                                                       |
| TERG_02418 | E004 | 9.72E-03 | 0.04  | translation initiation factor SUI1                                                                                                       |
| TERG_02521 | E001 | 1.88E-04 | 0.03  | 60S ribosomal protein L27a<br>nicotinate-nucleotide diphosphorylase<br>(carboxylating)                                                   |
| TERG_02535 | E003 | 6.62E-04 | -0.14 | Phosphoglucomutase ( <i>T. tonsurans</i> )                                                                                               |
| TERG_02601 | E006 | 3.04E-04 | -7.18 | dihydrolipoamide succinyltransferase ( <i>T. equinum</i> )                                                                               |
| TERG_02628 | E002 | 3.47E-02 | 0.15  | LYR family protein ( <i>T. equinum</i> )                                                                                                 |
| TERG_02629 | E005 | 7.06E-03 | -0.40 | membrane transporter ( <i>T. equinum</i> )                                                                                               |
| TERG_02654 | E006 | 7.74E-03 | 6.32  | glycosyl hydrolase ( <i>T. equinum</i> )                                                                                                 |
| TERG_02719 | E005 | 4.44E-02 | -1.85 | fatty acid oxygenase PpoC, putative ( <i>A. benhamiae</i> )                                                                              |
| TERG_02735 | E008 | 4.51E-02 | 0.13  | fatty acid oxygenase PpoC, putative ( <i>A. benhamiae</i> )                                                                              |
| TERG_02735 | E009 | 5.23E-03 | 0.14  | BUB protein kinase                                                                                                                       |
| TERG_02761 | E003 | 1.40E-03 | 0.13  | pyroglutamyl peptidase type I ( <i>T. equinum</i> )                                                                                      |
| TERG_02767 | E001 | 4.41E-02 | -0.08 | pyroglutamyl peptidase type I ( <i>T. equinum</i> )                                                                                      |
| TERG_02767 | E002 | 4.40E-02 | 0.06  | pyroglutamyl peptidase type I ( <i>T. equinum</i> )                                                                                      |
| TERG_02832 | E002 | 4.92E-02 | -0.04 | HECT domain protein ( <i>T. verrucosum</i> )                                                                                             |
| TERG_02853 | E001 | 1.67E-03 | -0.32 | WD repeat containing protein pop3 ( <i>T. tonsurans</i> )                                                                                |
| TERG_02853 | E007 | 6.78E-04 | 0.04  | WD repeat containing protein pop3 ( <i>T. tonsurans</i> )                                                                                |
| TERG_02853 | E008 | 4.24E-04 | 0.07  | WD repeat containing protein pop3 ( <i>T. tonsurans</i> )                                                                                |
| TERG_02885 | E009 | 1.07E-03 | -0.19 | E3 ubiquitin-protein ligase pub1 ( <i>T. tonsurans</i> )                                                                                 |
| TERG_02890 | E001 | 1.16E-02 | -0.55 | rhomboid family protein, putative ( <i>A. benhamiae</i> )                                                                                |
| TERG_02923 | E001 | 1.06E-02 | -0.19 | protein kinase subdomain-containing protein ( <i>T. equinum</i> )                                                                        |
| TERG_02923 | E006 | 2.95E-02 | 0.22  | protein kinase subdomain-containing protein ( <i>T. equinum</i> )                                                                        |
| TERG_02968 | E003 | 3.37E-02 | -1.26 | GPI transamidase component Gpi16 ( <i>T. tonsurans</i> )                                                                                 |
| TERG_03017 | E002 | 4.05E-02 | -0.22 | AGC protein kinase                                                                                                                       |
| TERG_03038 | E003 | 1.38E-02 | -0.14 | translation elongation factor Tu                                                                                                         |
| TERG_03067 | E001 | 4.00E-02 | -0.43 | hypothetical protein                                                                                                                     |
| TERG_03067 | E002 | 2.86E-02 | 0.05  | hypothetical protein                                                                                                                     |
| TERG_03070 | E004 | 7.74E-03 | -0.07 | flotillin domain-containing protein ( <i>T. equinum</i> )                                                                                |
| TERG_03070 | E006 | 4.80E-04 | 0.56  | flotillin domain-containing protein ( <i>T. equinum</i> )                                                                                |
| TERG_03070 | E007 | 4.26E-09 | 0.07  | flotillin domain-containing protein ( <i>T. equinum</i> )                                                                                |
| TERG_03082 | E005 | 2.59E-02 | 0.22  | 5'-3' exoribonuclease ( <i>T. tonsurans</i> )                                                                                            |
| TERG_03083 | E001 | 4.02E-02 | -0.05 | 3-phosphoshikimate 1-carboxyvinyltransferase<br>transcriptional corepressor of histone genes (Hir3),<br>putative ( <i>A. benhamiae</i> ) |
| TERG_03118 | E010 | 3.67E-02 | -0.15 | histone H3                                                                                                                               |
| TERG_03123 | E001 | 1.66E-04 | 0.01  | histone H3                                                                                                                               |

|            |      |          |       |                                                                   |
|------------|------|----------|-------|-------------------------------------------------------------------|
| TERG_03373 | E001 | 8.42E-03 | 0.19  | TAM domain methyltransferase, putative ( <i>A. benhamiae</i> )    |
| TERG_03401 | E001 | 1.05E-02 | 0.21  | high affinity nickel transporter ( <i>T. tonsurans</i> )          |
| TERG_03441 | E003 | 3.73E-02 | 0.14  | hypothetical protein                                              |
| TERG_03494 | E008 | 4.33E-02 | 0.96  | hypothetical protein                                              |
| TERG_03652 | E001 | 1.90E-02 | -0.07 | chromosome segregation protein sudA                               |
| TERG_03652 | E003 | 2.56E-02 | 0.21  | chromosome segregation protein sudA                               |
| TERG_03654 | E004 | 2.31E-03 | 0.08  | NADH-cytochrome b5 reductase 1                                    |
| TERG_03656 | E002 | 1.08E-03 | -0.04 | arginine-tRNA ligase                                              |
| TERG_03656 | E003 | 1.32E-02 | 0.16  | arginine-tRNA ligase                                              |
| TERG_03700 | E002 | 4.82E-02 | 0.39  | hypothetical protein                                              |
| TERG_03795 | E001 | 3.63E-02 | 0.08  | ubiquitin C-terminal hydrolase, putative ( <i>T. verrucosum</i> ) |
| TERG_03818 | E002 | 7.27E-03 | -0.26 | import receptor ( <i>T. tonsurans</i> )                           |
| TERG_03821 | E001 | 4.53E-03 | 0.11  | SLY1 ( <i>T. equinum</i> )                                        |
| TERG_03821 | E007 | 1.08E-03 | -0.11 | SLY1 ( <i>T. equinum</i> )                                        |
| TERG_03850 | E001 | 3.12E-02 | -1.66 | hypothetical protein                                              |
| TERG_03850 | E002 | 2.35E-02 | 0.51  | hypothetical protein                                              |
| TERG_03857 | E004 | 1.94E-03 | 0.75  | phosphotransferase enzyme family protein ( <i>T. equinum</i> )    |
| TERG_03857 | E006 | 5.25E-03 | 0.32  | phosphotransferase enzyme family protein ( <i>T. equinum</i> )    |
| TERG_03872 | E012 | 4.35E-02 | 0.21  | CMGC/MAPK/P38 protein kinase                                      |
| TERG_03933 | E001 | 6.26E-03 | 0.11  | ABC metal ion transporter ( <i>T. equinum</i> )                   |
| TERG_03933 | E014 | 2.08E-02 | -0.07 | ABC metal ion transporter ( <i>T. equinum</i> )                   |
| TERG_03946 | E004 | 8.50E-04 | 0.11  | SH3 domain-containing protein ( <i>T. tonsurans</i> )             |
| TERG_03967 | E001 | 1.96E-03 | 0.11  | THO complex protein subunit 2 ( <i>T. equinum</i> )               |
| TERG_03967 | E002 | 7.25E-04 | -0.12 | THO complex protein subunit 2 ( <i>T. equinum</i> )               |
| TERG_03981 | E007 | 1.95E-03 | 0.15  | hypothetical protein                                              |
| TERG_04087 | E001 | 3.05E-03 | -0.03 | DnaJ domain-containing protein ( <i>T. tonsurans</i> )            |
| TERG_04142 | E005 | 2.97E-22 | -0.50 | cofilin ( <i>T. equinum</i> )                                     |
| TERG_04142 | E009 | 1.81E-02 | 0.51  | cofilin ( <i>T. equinum</i> )                                     |
| TERG_04142 | E010 | 6.44E-03 | 0.07  | cofilin ( <i>T. equinum</i> )                                     |
| TERG_04281 | E002 | 1.39E-03 | -0.06 | woronin body major protein                                        |
| TERG_04281 | E005 | 2.32E-02 | 0.04  | woronin body major protein                                        |
| TERG_04301 | E002 | 6.44E-03 | 0.63  | transcription factor RfeG ( <i>T. tonsurans</i> )                 |
| TERG_04450 | E001 | 1.71E-05 | 0.10  | 60S ribosomal protein L23 ( <i>T. tonsurans</i> )                 |
| TERG_04450 | E004 | 1.02E-02 | -0.03 | 60S ribosomal protein L23 ( <i>T. tonsurans</i> )                 |
| TERG_04461 | E009 | 4.35E-02 | -0.24 | P-type ATPase ( <i>T. equinum</i> )                               |
| TERG_04461 | E016 | 2.23E-02 | -0.26 | P-type ATPase ( <i>T. equinum</i> )                               |
| TERG_04470 | E001 | 4.39E-04 | 0.15  | serine-tRNA ligase                                                |
| TERG_04478 | E002 | 2.88E-03 | 0.03  | 40S ribosomal protein S1                                          |
| TERG_04490 | E004 | 1.21E-05 | -1.60 | NADH-ubiquinone oxidoreductase 78 kDa subunit, mitochondrial      |
| TERG_04490 | E005 | 1.96E-02 | -0.32 | NADH-ubiquinone oxidoreductase 78 kDa subunit, mitochondrial      |
| TERG_04558 | E005 | 4.77E-05 | 0.07  | nucleoside diphosphate kinase                                     |
| TERG_04851 | E001 | 5.25E-03 | 0.02  | Acyl CoA binding protein family protein ( <i>A. benhamiae</i> )   |
| TERG_04903 | E004 | 2.74E-02 | 0.19  | thermotolerance protein ( <i>T. equinum</i> )                     |
| TERG_04904 | E001 | 4.40E-02 | -0.18 | translation initiation factor aIF-2                               |
| TERG_04928 | E003 | 2.13E-02 | -0.22 | elongation factor 2                                               |

|            |      |          |       |                                                                                              |
|------------|------|----------|-------|----------------------------------------------------------------------------------------------|
| TERG_04928 | E004 | 1.32E-02 | -0.05 | elongation factor 2                                                                          |
| TERG_04928 | E005 | 2.86E-06 | 0.02  | elongation factor 2                                                                          |
| TERG_05050 | E001 | 4.89E-03 | 0.11  | acyltransferase ( <i>T. equinum</i> )                                                        |
| TERG_05089 | E001 | 2.88E-03 | 0.02  | serine/threonine-protein phosphatase 2A catalytic subunit beta isoform ( <i>T. equinum</i> ) |
| TERG_05089 | E002 | 1.06E-11 | 0.63  | serine/threonine-protein phosphatase 2A catalytic subunit beta isoform ( <i>T. equinum</i> ) |
| TERG_05101 | E001 | 8.50E-04 | 0.09  | MYB DNA binding protein ( <i>T. tonsurans</i> )                                              |
| TERG_05101 | E002 | 2.22E-02 | -0.28 | MYB DNA binding protein ( <i>T. tonsurans</i> )                                              |
| TERG_05141 | E004 | 4.33E-02 | 1.14  | NCS1 nucleoside transporter ( <i>T. equinum</i> )                                            |
| TERG_05161 | E006 | 1.03E-02 | 0.04  | 26S proteasome regulatory subunit rpn-1                                                      |
| TERG_05186 | E001 | 3.14E-02 | -0.14 | RING finger ubiquitin ligase ( <i>T. tonsurans</i> )                                         |
| TERG_05236 | E001 | 2.83E-06 | 0.04  | 60S ribosomal protein L35                                                                    |
| TERG_05261 | E003 | 1.59E-02 | -0.09 | karyopherin alpha subunit ( <i>T. tonsurans</i> )                                            |
| TERG_05475 | E003 | 4.77E-05 | -1.88 | Got1 family protein ( <i>T. tonsurans</i> )                                                  |
| TERG_05483 | E001 | 3.63E-02 | 0.18  | transcription elongation factor spt5 ( <i>M. gypseum</i> )                                   |
| TERG_05524 | E002 | 4.51E-02 | -0.69 | 3-deoxy-7-phosphoheptulonate synthase                                                        |
| TERG_05532 | E005 | 2.81E-02 | -0.26 | monosaccharide transporter ( <i>T. tonsurans</i> )                                           |
| TERG_05540 | E001 | 4.77E-02 | 0.51  | cytochrome P450 monooxygenase, putative ( <i>T. verrucosum</i> )                             |
| TERG_05558 | E001 | 2.49E-02 | 0.07  | ornithine decarboxylase, putative ( <i>T. verrucosum</i> )                                   |
| TERG_05558 | E003 | 5.01E-03 | -0.09 | ornithine decarboxylase, putative ( <i>T. verrucosum</i> )                                   |
| TERG_05579 | E003 | 1.11E-02 | -0.10 | FAD dependent oxidoreductase, putative ( <i>A. benhamiae</i> )                               |
| TERG_05789 | E002 | 2.35E-02 | -0.08 | NADH-cytochrome b5 reductase 2                                                               |
| TERG_05789 | E003 | 9.30E-04 | 0.11  | NADH-cytochrome b5 reductase 2                                                               |
| TERG_05821 | E013 | 1.16E-03 | 0.21  | pyruvate kinase                                                                              |
| TERG_05829 | E001 | 3.69E-02 | -0.08 | WD domain, G-beta repeat containing protein ( <i>T. tonsurans</i> )                          |
| TERG_05829 | E002 | 3.90E-02 | 0.13  | WD domain, G-beta repeat containing protein ( <i>T. tonsurans</i> )                          |
| TERG_05971 | E006 | 3.67E-02 | -0.18 | ribonucleoside-diphosphate reductase small chain                                             |
| TERG_05992 | E001 | 1.14E-02 | -0.20 | translational initiation factor 2 beta ( <i>T. tonsurans</i> )                               |
| TERG_06028 | E004 | 4.34E-02 | 0.08  | peptidyl-prolyl cis-trans isomerase-like 4                                                   |
| TERG_06057 | E004 | 4.92E-02 | -0.12 | C2 domain-containing protein ( <i>T. equinum</i> )                                           |
| TERG_06172 | E002 | 3.87E-02 | -0.01 | 60S ribosomal protein L12                                                                    |
| TERG_06234 | E001 | 3.58E-02 | 0.27  | 2,5-diketo-D-gluconic acid reductase A ( <i>T. equinum</i> )                                 |
| TERG_06241 | E007 | 4.91E-04 | 0.14  | importin 11 ( <i>T. equinum</i> )                                                            |
| TERG_06286 | E001 | 1.32E-02 | 0.37  | C6 finger domain-containing protein ( <i>T. equinum</i> )                                    |
| TERG_06288 | E009 | 2.72E-03 | 1.57  | FACT complex subunit pob3                                                                    |
| TERG_06293 | E004 | 1.85E-02 | -0.16 | vacuolar sorting protein ( <i>T. tonsurans</i> )                                             |
| TERG_06304 | E001 | 6.63E-03 | -0.26 | NEDD8-activating enzyme E1 catalytic subunit ( <i>T. equinum</i> )                           |
| TERG_06309 | E003 | 1.00E-02 | 0.32  | oxidoreductase, 2OG-Fe(II) oxygenase family, putative ( <i>A. benhamiae</i> )                |
| TERG_06340 | E003 | 4.03E-02 | -0.20 | AGC/PKC protein kinase                                                                       |
| TERG_06347 | E001 | 2.83E-06 | 0.33  | hypothetical protein                                                                         |
| TERG_06437 | E004 | 1.26E-02 | -0.02 | ribosomal protein L28e ( <i>T. equinum</i> )                                                 |
| TERG_06475 | E003 | 3.57E-04 | 0.08  | zinc knuckle domain-containing protein ( <i>T. tonsurans</i> )                               |
| TERG_06505 | E002 | 1.32E-02 | -0.02 | hsp70-like protein                                                                           |
| TERG_06505 | E006 | 3.63E-02 | 0.64  | hsp70-like protein                                                                           |

|            |      |          |       |                                                                                                                                       |
|------------|------|----------|-------|---------------------------------------------------------------------------------------------------------------------------------------|
| TERG_06646 | E001 | 4.71E-02 | -0.07 | arrestin ( <i>T. equinum</i> )                                                                                                        |
| TERG_06646 | E002 | 4.64E-02 | 0.04  | arrestin ( <i>T. equinum</i> )                                                                                                        |
| TERG_06656 | E004 | 1.02E-02 | 0.18  | T-complex protein 1 subunit beta                                                                                                      |
| TERG_06704 | E001 | 1.24E-04 | -0.14 | vacuolar protease A                                                                                                                   |
| TERG_06704 | E004 | 1.05E-02 | 0.05  | vacuolar protease A                                                                                                                   |
| TERG_06725 | E007 | 6.34E-03 | 0.04  | non-histone chromosomal protein 6                                                                                                     |
| TERG_06735 | E001 | 1.24E-04 | -0.21 | oxysterol binding protein ( <i>T. tonsurans</i> )                                                                                     |
| TERG_06749 | E001 | 7.92E-05 | -0.33 | cell wall protein, putative ( <i>A. benhamiae</i> )                                                                                   |
| TERG_06749 | E003 | 2.32E-02 | 0.24  | cell wall protein, putative ( <i>A. benhamiae</i> )                                                                                   |
| TERG_06797 | E002 | 3.67E-02 | -0.18 | hypothetical protein                                                                                                                  |
| TERG_06844 | E002 | 2.26E-39 | -1.11 | 40S ribosomal protein S21                                                                                                             |
| TERG_06846 | E001 | 2.26E-06 | 0.05  | inosine-5'-monophosphate dehydrogenase                                                                                                |
| TERG_06846 | E002 | 8.95E-06 | -0.09 | inosine-5'-monophosphate dehydrogenase membrane bound C2 domain-containing protein ( <i>T. tonsurans</i> )                            |
| TERG_06871 | E005 | 1.10E-02 | -0.12 | membrane bound C2 domain-containing protein ( <i>T. tonsurans</i> )                                                                   |
| TERG_06871 | E006 | 3.97E-02 | -0.10 | UTP-glucose-1-phosphate uridylyltransferase ( <i>T. tonsurans</i> )                                                                   |
| TERG_06874 | E001 | 2.17E-03 | -0.47 | UTP-glucose-1-phosphate uridylyltransferase ( <i>T. tonsurans</i> )                                                                   |
| TERG_06874 | E003 | 6.32E-03 | 0.03  | UTP-glucose-1-phosphate uridylyltransferase ( <i>T. tonsurans</i> )                                                                   |
| TERG_06969 | E001 | 4.10E-02 | 0.09  | CMGC/CDK/CDK5 protein kinase                                                                                                          |
| TERG_06995 | E001 | 4.66E-03 | 0.04  | metalloreductase, putative ( <i>T. verrucosum</i> )                                                                                   |
| TERG_06995 | E003 | 2.45E-02 | -0.30 | metalloreductase, putative ( <i>T. verrucosum</i> )                                                                                   |
| TERG_07005 | E004 | 3.47E-02 | -0.07 | PAB-dependent poly(A)-specific ribonuclease subunit PAN3 ( <i>T. tonsurans</i> )                                                      |
| TERG_07015 | E001 | 3.19E-02 | 0.13  | MFS transporter, putative ( <i>T. verrucosum</i> )                                                                                    |
| TERG_07016 | E007 | 6.44E-03 | 0.07  | mitochondrial-processing peptidase subunit beta                                                                                       |
| TERG_07038 | E001 | 1.20E-02 | 0.13  | glutamine-tRNA ligase                                                                                                                 |
| TERG_07127 | E003 | 1.66E-04 | -0.07 | homocitrate synthase, mitochondrial                                                                                                   |
| TERG_07127 | E008 | 4.97E-02 | 0.05  | homocitrate synthase, mitochondrial                                                                                                   |
| TERG_07143 | E001 | 1.66E-04 | -0.47 | potassium/sodium efflux P-type ATPase, fungal-type                                                                                    |
| TERG_07159 | E008 | 7.25E-04 | -0.18 | geranylgeranyl transferase type II alpha subunit, putative ( <i>T. verrucosum</i> )                                                   |
| TERG_07187 | E005 | 7.25E-04 | -0.05 | L-aminoadipate-semialdehyde dehydrogenase large subunit                                                                               |
| TERG_07208 | E005 | 8.07E-04 | 0.07  | SNF7 family protein ( <i>T. equinum</i> )                                                                                             |
| TERG_07276 | E004 | 2.27E-04 | 0.72  | oxoglutarate dehydrogenase (succinyl-transferring), E1 component                                                                      |
| TERG_07414 | E001 | 4.64E-02 | -0.53 | hypothetical protein                                                                                                                  |
| TERG_07461 | E003 | 4.79E-02 | 0.20  | AP-2 complex subunit sigma                                                                                                            |
| TERG_07508 | E001 | 4.98E-03 | 0.19  | hypothetical protein                                                                                                                  |
| TERG_07588 | E006 | 1.27E-03 | -0.71 | 5-methyltetrahydropteroyltriglutamate-homocysteine S-methyltransferase FMN dependent dehydrogenase, putative ( <i>T. verrucosum</i> ) |
| TERG_07630 | E003 | 4.34E-04 | 0.79  | peroxisomal 3-ketoacyl-coA thiolase (Kat1), putative ( <i>A. benhamiae</i> )                                                          |
| TERG_07659 | E003 | 2.38E-04 | -0.16 | peroxisomal 3-ketoacyl-coA thiolase (Kat1), putative ( <i>A. benhamiae</i> )                                                          |
| TERG_07659 | E005 | 2.01E-03 | 0.11  | peroxisomal 3-ketoacyl-coA thiolase (Kat1), putative ( <i>A. benhamiae</i> )                                                          |
| TERG_07662 | E001 | 4.40E-02 | 0.17  | mannosylphosphate transferase ( <i>T. tonsurans</i> )                                                                                 |
| TERG_07684 | E001 | 2.91E-02 | -0.05 | hypothetical protein                                                                                                                  |
| TERG_07684 | E002 | 2.95E-02 | 0.06  | hypothetical protein                                                                                                                  |
| TERG_07821 | E001 | 7.31E-03 | -0.29 | hypothetical protein                                                                                                                  |

|            |      |          |       |                                                                                                                                           |
|------------|------|----------|-------|-------------------------------------------------------------------------------------------------------------------------------------------|
| TERG_07821 | E002 | 6.28E-03 | 0.18  | hypothetical protein                                                                                                                      |
| TERG_07862 | E001 | 8.42E-03 | 0.21  | dynein light intermediate chain ( <i>T. tonsurans</i> )                                                                                   |
| TERG_07942 | E005 | 1.62E-02 | 0.17  | calcium channel subunit Cch1 ( <i>T. tonsurans</i> )                                                                                      |
| TERG_07942 | E006 | 4.33E-02 | -0.22 | calcium channel subunit Cch1 ( <i>T. tonsurans</i> )                                                                                      |
| TERG_07966 | E007 | 9.28E-17 | -2.02 | tryptophan-tRNA ligase                                                                                                                    |
| TERG_07966 | E009 | 1.27E-02 | 0.12  | tryptophan-tRNA ligase                                                                                                                    |
| TERG_08072 | E007 | 3.62E-02 | 0.17  | C6 transcription factor, putative ( <i>A. benhamiae</i> )<br>conidial pigment biosynthesis oxidase Abr1/brown<br>( <i>T. verrucosum</i> ) |
| TERG_08091 | E004 | 1.02E-02 | 0.09  | ADP-ribose 1"-phosphate phosphatase ( <i>T. equinum</i> )                                                                                 |
| TERG_08145 | E001 | 2.76E-02 | 0.12  | cation diffusion facilitator family metal ion<br>transporter, putative ( <i>T. verrucosum</i> )                                           |
| TERG_08250 | E001 | 3.41E-04 | -0.41 | hypothetical protein                                                                                                                      |
| TERG_08258 | E005 | 1.95E-02 | -0.47 | GPI anchored CFEM domain protein ( <i>T. verrucosum</i> )                                                                                 |
| TERG_08286 | E002 | 9.88E-03 | -0.02 | GPI anchored CFEM domain protein ( <i>T. verrucosum</i> )                                                                                 |
| TERG_08286 | E003 | 2.14E-02 | 0.03  | mitochondrial heat shock protein Hsp10 ( <i>A. benhamiae</i> )                                                                            |
| TERG_08312 | E002 | 1.09E-03 | 0.04  | mitochondrial heat shock protein Hsp10 ( <i>A. benhamiae</i> )                                                                            |
| TERG_08312 | E003 | 2.35E-02 | -0.06 | cytochrome P450 55A3 ( <i>T. tonsurans</i> )                                                                                              |
| TERG_08353 | E002 | 6.32E-05 | -1.00 | cytochrome P450 55A3 ( <i>T. tonsurans</i> )                                                                                              |
| TERG_08353 | E011 | 1.07E-02 | -0.95 | cytochrome P450 55A3 ( <i>T. tonsurans</i> )                                                                                              |
| TERG_08426 | E001 | 3.76E-03 | 0.07  | copper-translocating P-type ATPase                                                                                                        |
| TERG_08462 | E011 | 4.47E-02 | -0.31 | NAD kinase/ATP NAD kinase ( <i>T. tonsurans</i> )                                                                                         |
| TERG_08491 | E001 | 2.27E-05 | 0.33  | Elongation factor Tu ( <i>T. equinum</i> )                                                                                                |
| TERG_08491 | E006 | 1.56E-05 | -0.21 | Elongation factor Tu ( <i>T. equinum</i> )<br>cell division control protein (Cdc15), putative ( <i>A. benhamiae</i> )                     |
| TERG_08648 | E003 | 9.96E-03 | -0.44 | cell division control protein (Cdc15), putative ( <i>A. benhamiae</i> )                                                                   |
| TERG_08648 | E004 | 1.90E-04 | 0.12  | ABC multidrug transporter, putative ( <i>A. benhamiae</i> )                                                                               |
| TERG_08751 | E002 | 1.35E-02 | 0.13  | hypothetical protein                                                                                                                      |
| TERG_08980 | E001 | 1.93E-04 | 1.91  | hypothetical protein                                                                                                                      |
| TERG_08980 | E002 | 2.14E-02 | 1.98  | hypothetical protein                                                                                                                      |
| TERG_08982 | E001 | 1.89E-04 | 0.23  | hypothetical protein                                                                                                                      |
| TERG_08982 | E002 | 1.73E-04 | -0.15 | hypothetical protein                                                                                                                      |
| TERG_08991 | E004 | 6.16E-04 | 0.06  | ATPase 2 nuclear control ( <i>M. gypseum</i> )<br>mitochondrial 40S ribosomal protein ( <i>T. tonsurans</i> )                             |
| TERG_11660 | E002 | 7.62E-03 | 0.09  | mitochondrial 40S ribosomal protein ( <i>T. tonsurans</i> )                                                                               |
| TERG_11660 | E003 | 9.40E-06 | 0.24  | mitochondrial 40S ribosomal protein ( <i>T. tonsurans</i> )                                                                               |
| TERG_11660 | E004 | 4.26E-09 | -1.13 | mitochondrial 40S ribosomal protein ( <i>T. tonsurans</i> )                                                                               |
| TERG_11660 | E005 | 2.08E-06 | -0.79 | mitochondrial 40S ribosomal protein ( <i>T. tonsurans</i> )                                                                               |
| TERG_11660 | E006 | 2.56E-09 | -0.47 | mitochondrial 40S ribosomal protein ( <i>T. tonsurans</i> )                                                                               |
| TERG_11660 | E007 | 5.39E-03 | -0.37 | mitochondrial 40S ribosomal protein ( <i>T. tonsurans</i> )                                                                               |
| TERG_11688 | E001 | 5.08E-10 | -0.35 | nitrilase ( <i>T. tonsurans</i> )                                                                                                         |
| TERG_11751 | E001 | 5.31E-07 | -0.20 | PCI domain-containing protein ( <i>T. tonsurans</i> )                                                                                     |
| TERG_11751 | E002 | 3.87E-08 | -0.15 | PCI domain-containing protein ( <i>T. tonsurans</i> )                                                                                     |
| TERG_11751 | E005 | 6.96E-06 | 0.06  | PCI domain-containing protein ( <i>T. tonsurans</i> )                                                                                     |
| TERG_11871 | E002 | 4.33E-02 | 0.20  | ubiquitin C-terminal hydrolase 37 ( <i>T. verrucosum</i> )                                                                                |

|            |      |          |       |                                                     |
|------------|------|----------|-------|-----------------------------------------------------|
| TERG_11879 | E001 | 3.31E-02 | -0.23 | hypothetical protein                                |
| TERG_11879 | E002 | 2.86E-02 | 0.05  | hypothetical protein                                |
| TERG_11991 | E003 | 4.90E-02 | 0.62  | hypothetical protein                                |
| TERG_12154 | E016 | 7.92E-06 | -0.09 | leukotriene A4 hydrolase ( <i>T. verrucosum</i> )   |
| TERG_12303 | E001 | 1.66E-02 | 0.35  | myosin-1                                            |
| TERG_12303 | E002 | 2.83E-02 | 0.21  | myosin-1                                            |
| TERG_12642 | E004 | 3.87E-02 | 0.19  | Poly(A) polymerase PAPalpha ( <i>T. tonsurans</i> ) |

---

Total genes = 214, Differential exon usage = 309.

**Supplementary Table S4.** Read counts in intronic regions obtained from RNA-seq data analysis using Perl script.

| Transcript   | Intron  | Gene Product Name                                                                | 0 hour | 3 hours | 12 hours |
|--------------|---------|----------------------------------------------------------------------------------|--------|---------|----------|
| TERG_00014T0 | Intron1 | hypothetical protein                                                             | 1069   | 0       | 8        |
| TERG_00017T0 | Intron2 | Smr domain protein ( <i>T. verrucosum</i> )                                      | 4490   | 10660   | 501      |
| TERG_00024T0 | Intron1 | ADP-ribosylation factor 6                                                        | 0      | 0       | 19       |
| TERG_00024T0 | Intron3 | ADP-ribosylation factor 6                                                        | 0      | 0       | 32       |
| TERG_00024T1 | Intron1 | ADP-ribosylation factor 6                                                        | 0      | 0       | 22       |
| TERG_00029T0 | Intron1 | copper fist DNA binding domain-containing protein ( <i>T. equinum</i> )          | 0      | 0       | 75       |
| TERG_00057T0 | Intron1 | hypothetical protein                                                             | 0      | 0       | 130      |
| TERG_00089T0 | Intron1 | methylthioadenosine phosphorylase                                                | 30     | 0       | 776      |
| TERG_00089T0 | Intron2 | methylthioadenosine phosphorylase                                                | 0      | 0       | 137      |
| TERG_00090T0 | Intron2 | cellular morphogenesis protein (Bud22), putative ( <i>A. benhamiae</i> )         | 0      | 0       | 36       |
| TERG_00105T0 | Intron1 | 40S ribosomal protein S30                                                        | 0      | 0       | 68       |
| TERG_00106T0 | Intron1 | 60S ribosomal protein L24                                                        | 0      | 0       | 13       |
| TERG_00106T0 | Intron2 | 60S ribosomal protein L24                                                        | 0      | 0       | 259      |
| TERG_00124T0 | Intron1 | peroxisomal matrix protein ( <i>T. equinum</i> )                                 | 0      | 0       | 1340     |
| TERG_00130T0 | Intron1 | Rab geranylgeranyl transferase escort protein, putative ( <i>T. verrucosum</i> ) | 0      | 0       | 136      |
| TERG_00139T0 | Intron1 | MADS box transcription factor ( <i>T. tonsurans</i> )                            | 0      | 0       | 212      |
| TERG_00141T0 | Intron2 | DUF803 domain-containing protein ( <i>T. equinum</i> )                           | 0      | 0       | 17       |
| TERG_00163T0 | Intron6 | siderochrome-iron transporter, putative ( <i>A. benhamiae</i> )                  | 0      | 0       | 478      |
| TERG_00170T0 | Intron1 | hypothetical protein                                                             | 0      | 0       | 17       |
| TERG_00170T1 | Intron1 | hypothetical protein                                                             | 0      | 0       | 24       |
| TERG_00184T0 | Intron2 | ribose-phosphate pyrophosphokinase ( <i>T. tonsurans</i> )                       | 0      | 0       | 3109     |
| TERG_00206T0 | Intron1 | DNA repair protein rad9 ( <i>T. equinum</i> )                                    | 0      | 0       | 214      |
| TERG_00221T0 | Intron1 | hypothetical protein                                                             | 0      | 0       | 41       |
| TERG_00221T0 | Intron2 | hypothetical protein                                                             | 0      | 0       | 10       |
| TERG_00222T0 | Intron1 | CP2 transcription factor, putative ( <i>A. benhamiae</i> )                       | 0      | 0       | 143      |
| TERG_00222T0 | Intron2 | CP2 transcription factor, putative ( <i>A. benhamiae</i> )                       | 0      | 0       | 611      |
| TERG_00231T0 | Intron1 | glutamate decarboxylase ( <i>T. equinum</i> )                                    | 0      | 0       | 288      |
| TERG_00241T1 | Intron2 | hypothetical protein                                                             | 0      | 1217    | 78       |
| TERG_00250T0 | Intron1 | phosphoacetylglucosamine mutase ( <i>T. equinum</i> )                            | 0      | 0       | 290      |
| TERG_00266T0 | Intron1 | hypothetical protein                                                             | 5524   | 0       | 177      |
| TERG_00273T0 | Intron1 | mucin ( <i>M. canis</i> )                                                        | 61473  | 192701  | 167539   |
| TERG_00276T4 | Intron1 | TATA-box-binding protein                                                         | 8828   | 0       | 1576     |
| TERG_00276T4 | Intron2 | TATA-box-binding protein                                                         | 9275   | 4795    | 206      |
| TERG_00276T4 | Intron3 | TATA-box-binding protein                                                         | 0      | 3116    | 0        |
| TERG_00276T4 | Intron4 | TATA-box-binding protein                                                         | 1275   | 0       | 0        |
| TERG_00276T3 | Intron1 | TATA-box-binding protein                                                         | 0      | 0       | 519      |
| TERG_00276T3 | Intron2 | TATA-box-binding protein                                                         | 6453   | 9180    | 301      |
| TERG_00276T3 | Intron3 | TATA-box-binding protein                                                         | 0      | 3613    | 64       |
| TERG_00276T3 | Intron4 | TATA-box-binding protein                                                         | 381    | 0       | 0        |
| TERG_00276T2 | Intron1 | TATA-box-binding protein                                                         | 0      | 0       | 716      |

|              |         |                                                                        |       |       |       |
|--------------|---------|------------------------------------------------------------------------|-------|-------|-------|
| TERG_00276T2 | Intron2 | TATA-box-binding protein                                               | 0     | 1817  | 50    |
| TERG_00276T2 | Intron3 | TATA-box-binding protein                                               | 1173  | 0     | 0     |
| TERG_00276T1 | Intron1 | TATA-box-binding protein                                               | 0     | 0     | 639   |
| TERG_00276T1 | Intron2 | TATA-box-binding protein                                               | 7306  | 8114  | 272   |
| TERG_00276T1 | Intron3 | TATA-box-binding protein                                               | 0     | 2612  | 39    |
| TERG_00276T1 | Intron4 | TATA-box-binding protein                                               | 529   | 0     | 24    |
| TERG_00276T0 | Intron1 | TATA-box-binding protein                                               | 0     | 0     | 531   |
| TERG_00276T0 | Intron2 | TATA-box-binding protein                                               | 0     | 1082  | 57    |
| TERG_00276T0 | Intron3 | TATA-box-binding protein                                               | 1290  | 0     | 62    |
| TERG_00288T0 | Intron1 | 5'/3'-nucleotidase SurE                                                | 4559  | 0     | 0     |
| TERG_00288T0 | Intron3 | 5'/3'-nucleotidase SurE                                                | 0     | 0     | 13370 |
| TERG_00302T1 | Intron1 | GTP-binding protein rho2                                               | 0     | 0     | 97    |
| TERG_00302T1 | Intron2 | GTP-binding protein rho2                                               | 0     | 0     | 92    |
| TERG_00302T0 | Intron1 | GTP-binding protein rho2                                               | 0     | 0     | 162   |
| TERG_00302T2 | Intron1 | GTP-binding protein rho2                                               | 0     | 0     | 62    |
| TERG_00302T2 | Intron2 | GTP-binding protein rho2                                               | 0     | 0     | 38    |
| TERG_00328T0 | Intron1 | hypothetical protein                                                   | 0     | 0     | 170   |
| TERG_00332T0 | Intron1 | nuclear transport factor 2                                             | 0     | 0     | 115   |
| TERG_00332T0 | Intron2 | nuclear transport factor 2                                             | 7908  | 0     | 0     |
| TERG_00332T0 | Intron4 | nuclear transport factor 2                                             | 0     | 0     | 617   |
| TERG_00332T0 | Intron5 | nuclear transport factor 2                                             | 0     | 0     | 45    |
| TERG_00342T0 | Intron1 | phosphoglucomutase                                                     | 0     | 5690  | 7     |
| TERG_00369T0 | Intron3 | branchpoint-bridging protein                                           | 0     | 0     | 290   |
| TERG_00373T0 | Intron1 | hypothetical protein                                                   | 931   | 0     | 54    |
| TERG_00383T0 | Intron1 | 60S ribosomal protein L16                                              | 0     | 0     | 12    |
| TERG_00383T0 | Intron2 | 60S ribosomal protein L16                                              | 2762  | 19278 | 67    |
| TERG_00393T0 | Intron1 | glutenin ( <i>M. canis</i> )                                           | 9946  | 0     | 37    |
| TERG_00410T0 | Intron1 | hypothetical protein                                                   | 0     | 0     | 38    |
| TERG_00415T1 | Intron1 | KH domain RNA-binding protein ( <i>T. tonsurans</i> )                  | 0     | 0     | 11    |
| TERG_00441T0 | Intron1 | peptidyl-prolyl cis-trans isomerase pin4                               | 0     | 0     | 29    |
| TERG_00444T0 | Intron1 | 3-oxo-5-alpha-steroid 4-dehydrogenase ( <i>T. tonsurans</i> )          | 0     | 0     | 117   |
| TERG_00453T0 | Intron1 | PXA domain-containing protein ( <i>T. tonsurans</i> )                  | 6891  | 0     | 3405  |
| TERG_00462T0 | Intron1 | 40S ribosomal protein                                                  | 3834  | 0     | 28    |
| TERG_00466T0 | Intron1 | SirB protein ( <i>T. equinum</i> )                                     | 0     | 0     | 55    |
| TERG_00479T0 | Intron1 | hypothetical protein                                                   | 3622  | 0     | 69    |
| TERG_00520T0 | Intron1 | hypothetical protein                                                   | 0     | 0     | 46    |
| TERG_00520T0 | Intron3 | hypothetical protein                                                   | 0     | 0     | 399   |
| TERG_00523T0 | Intron1 | hypothetical protein                                                   | 0     | 0     | 27    |
| TERG_00526T0 | Intron1 | vacuolar protein sorting-associated protein 21 ( <i>T. tonsurans</i> ) | 0     | 0     | 21    |
| TERG_00529T0 | Intron5 | acetate kinase                                                         | 5336  | 9864  | 0     |
| TERG_00534T0 | Intron1 | Arp2/3 complex subunit Arc16 ( <i>T. tonsurans</i> )                   | 10109 | 8473  | 304   |
| TERG_00536T0 | Intron3 | D-galacturonic acid reductase ( <i>T. equinum</i> )                    | 1242  | 0     | 52    |
| TERG_00536T0 | Intron4 | D-galacturonic acid reductase ( <i>T. equinum</i> )                    | 1640  | 0     | 750   |
| TERG_00536T1 | Intron2 | D-galacturonic acid reductase ( <i>T. equinum</i> )                    | 0     | 0     | 10    |
| TERG_00536T1 | Intron3 | D-galacturonic acid reductase ( <i>T. equinum</i> )                    | 1035  | 0     | 63    |
| TERG_00548T0 | Intron3 | elongation factor 1-alpha                                              | 5094  | 7015  | 80    |



|              |         |                                                                               |       |        |        |
|--------------|---------|-------------------------------------------------------------------------------|-------|--------|--------|
| TERG_00566T0 | Intron1 | hypothetical protein                                                          | 19292 | 36399  | 91     |
| TERG_00570T0 | Intron1 | autophagy protein ( <i>T. equinum</i> )                                       | 0     | 0      | 211    |
| TERG_00574T0 | Intron1 | MFS multidrug transporter, putative ( <i>T. verrucosum</i> )                  | 0     | 0      | 398    |
| TERG_00576T0 | Intron1 | saccharopine dehydrogenase ( <i>T. tonsurans</i> )                            | 0     | 0      | 11     |
| TERG_00576T2 | Intron1 | saccharopine dehydrogenase ( <i>T. tonsurans</i> )                            | 0     | 0      | 17     |
| TERG_00587T0 | Intron1 | nuclear pore complex protein sonA ( <i>T. equinum</i> )                       | 0     | 0      | 16     |
| TERG_00590T0 | Intron1 | hypothetical protein                                                          | 0     | 1828   | 7      |
| TERG_00601T0 | Intron2 | CMGC/DYRK/DYRK2 protein kinase                                                | 0     | 0      | 112    |
| TERG_00603T0 | Intron1 | cell wall integrity and stress response component 4 ( <i>M. canis</i> )       | 0     | 0      | 21     |
| TERG_00607T0 | Intron3 | mitochondrial carnitine/acylcarnitine carrier protein ( <i>T. tonsurans</i> ) | 0     | 0      | 254    |
| TERG_00621T0 | Intron2 | FAD dependent oxidoreductase ( <i>T. tonsurans</i> )                          | 0     | 0      | 19     |
| TERG_00622T0 | Intron1 | yebR protein ( <i>M. gypseum</i> )                                            | 3631  | 0      | 0      |
| TERG_00626T0 | Intron1 | ADP-ribosylation factor-like protein 1                                        | 0     | 0      | 30     |
| TERG_00626T0 | Intron2 | ADP-ribosylation factor-like protein 1                                        | 1264  | 118689 | 106    |
| TERG_00635T0 | Intron2 | 40S ribosomal protein S14                                                     | 0     | 815    | 67     |
| TERG_00641T0 | Intron1 | iron-sulfur cluster assembly accessory protein I ( <i>T. equinum</i> )        | 89381 | 509250 | 415559 |
| TERG_00655T0 | Intron1 | mitochondrial import inner membrane translocase subunit tim16                 | 56896 | 153444 | 187    |
| TERG_00677T0 | Intron1 | hypothetical protein                                                          | 0     | 249    | 4515   |
| TERG_00696T0 | Intron1 | WEE/WEE-UNCLASSIFIED protein kinase                                           | 0     | 0      | 15     |
| TERG_00714T0 | Intron1 | cell pattern formation-associated protein ( <i>T. tonsurans</i> )             | 0     | 0      | 37     |
| TERG_00734T0 | Intron2 | dipeptidase ( <i>T. tonsurans</i> )                                           | 0     | 0      | 47     |
| TERG_00738T0 | Intron1 | 60S ribosomal protein L44                                                     | 986   | 0      | 758    |
| TERG_00738T1 | Intron1 | 60S ribosomal protein L44                                                     | 1887  | 0      | 1453   |
| TERG_00744T0 | Intron1 | CMGC/CDK protein kinase                                                       | 0     | 0      | 203    |
| TERG_00744T0 | Intron3 | CMGC/CDK protein kinase                                                       | 5386  | 0      | 35     |
| TERG_00757T0 | Intron1 | hypothetical protein                                                          | 0     | 0      | 135    |
| TERG_00765T0 | Intron2 | hypothetical protein                                                          | 0     | 0      | 50     |
| TERG_00783T0 | Intron3 | guanine nucleotide-binding protein subunit beta-like protein                  | 0     | 0      | 8225   |
| TERG_00785T0 | Intron1 | endoplasmic reticulum vesicle protein 25                                      | 0     | 0      | 34     |
| TERG_00787T0 | Intron1 | endoplasmic reticulum vesicle protein 25                                      | 0     | 0      | 42     |
| TERG_00799T0 | Intron1 | Haloacid dehalogenase ( <i>T. tonsurans</i> )                                 | 0     | 0      | 16     |
| TERG_00799T0 | Intron3 | Haloacid dehalogenase ( <i>T. tonsurans</i> )                                 | 0     | 0      | 36     |
| TERG_00818T0 | Intron1 | aldehyde dehydrogenase 3B1 ( <i>T. equinum</i> )                              | 0     | 0      | 392    |
| TERG_00820T3 | Intron1 | MFS multidrug transporter, putative ( <i>A. benhamiae</i> )                   | 0     | 0      | 26     |
| TERG_00820T2 | Intron1 | MFS multidrug transporter, putative ( <i>A. benhamiae</i> )                   | 74956 | 261441 | 4724   |
| TERG_00820T1 | Intron2 | MFS multidrug transporter, putative ( <i>A. benhamiae</i> )                   | 0     | 0      | 89     |
| TERG_00838T0 | Intron1 | pH-response transcription factor pacC/RIM101                                  | 0     | 0      | 48     |
| TERG_00851T0 | Intron2 | ankyrin repeat-containing protein ( <i>T. equinum</i> )                       | 0     | 0      | 44     |
| TERG_00861T0 | Intron1 | hypothetical protein                                                          | 0     | 2663   | 83     |
| TERG_00877T0 | Intron2 | CBS domain-containing protein ( <i>T. equinum</i> )                           | 93775 | 14069  | 47482  |
| TERG_00883T0 | Intron5 | acyl carrier protein                                                          | 0     | 0      | 108    |

|              |         |                                                                                                                                      |      |      |       |
|--------------|---------|--------------------------------------------------------------------------------------------------------------------------------------|------|------|-------|
| TERG_00895T0 | Intron2 | hypothetical protein<br>cAMP-dependent protein kinase regulatory subunit                                                             | 0    | 0    | 78    |
| TERG_00906T0 | Intron1 | hypothetical protein                                                                                                                 | 1564 | 3173 | 13306 |
| TERG_00928T0 | Intron1 | 2,3-bisphosphoglycerate-independent phosphoglycerate mutase                                                                          | 0    | 0    | 104   |
| TERG_00974T0 | Intron1 | PDCD2-C domain-containing protein ( <i>T. equinum</i> )                                                                              | 0    | 0    | 258   |
| TERG_00984T0 | Intron1 | F-box domain protein ( <i>T. verrucosum</i> )                                                                                        | 0    | 0    | 219   |
| TERG_01031T0 | Intron1 | metal homeostatis protein bsd2 ( <i>T. tonsurans</i> )                                                                               | 0    | 0    | 139   |
| TERG_01050T0 | Intron1 |                                                                                                                                      | 7961 | 2887 | 0     |
| TERG_01091T0 | Intron2 | magnesium-dependent phosphatase-1                                                                                                    | 0    | 0    | 5864  |
| TERG_01109T0 | Intron1 | WD repeat-containing protein ( <i>T. equinum</i> )                                                                                   | 0    | 0    | 54    |
| TERG_01111T0 | Intron2 | 50S ribosomal protein Mrp49 ( <i>T. tonsurans</i> )                                                                                  | 0    | 0    | 39    |
| TERG_01148T0 | Intron1 | hypothetical protein                                                                                                                 | 0    | 0    | 81    |
| TERG_01148T0 | Intron5 | hypothetical protein<br>RNase3 domain-containing protein ( <i>T. equinum</i> )                                                       | 0    | 0    | 136   |
| TERG_01183T0 | Intron1 |                                                                                                                                      | 0    | 0    | 214   |
| TERG_01198T0 | Intron1 | pre-mRNA-splicing factor rse1                                                                                                        | 856  | 0    | 112   |
| TERG_01198T0 | Intron2 | pre-mRNA-splicing factor rse1                                                                                                        | 0    | 0    | 1935  |
| TERG_01198T1 | Intron2 | pre-mRNA-splicing factor rse1<br>peptidyl-tRNA hydrolase domain protein ( <i>T. verrucosum</i> )                                     | 0    | 0    | 1650  |
| TERG_01216T0 | Intron1 | amidophosphoribosyltransferase ( <i>T. equinum</i> )                                                                                 | 0    | 0    | 11    |
| TERG_01267T1 | Intron1 | amidophosphoribosyltransferase ( <i>T. equinum</i> )                                                                                 | 0    | 3263 | 774   |
| TERG_01267T0 | Intron1 | hypothetical protein                                                                                                                 | 0    | 3294 | 599   |
| TERG_01282T0 | Intron1 | UMTA ( <i>T. equinum</i> )                                                                                                           | 0    | 0    | 137   |
| TERG_01284T0 | Intron2 | 2-dehydropantoate 2-reductase ( <i>T. verrucosum</i> )                                                                               | 3714 | 0    | 73    |
| TERG_01305T3 | Intron1 | 2-dehydropantoate 2-reductase ( <i>T. verrucosum</i> )                                                                               | 6452 | 0    | 1600  |
| TERG_01305T0 | Intron1 | 2-dehydropantoate 2-reductase ( <i>T. verrucosum</i> )                                                                               | 2155 | 0    | 862   |
| TERG_01305T1 | Intron1 | 2-dehydropantoate 2-reductase ( <i>T. verrucosum</i> )                                                                               | 3744 | 196  | 1427  |
| TERG_01308T0 | Intron1 | ATP-dependent RNA helicase SUB2<br>BTB/POZ domain-containing protein ( <i>T. tonsurans</i> )                                         | 0    | 0    | 296   |
| TERG_01321T0 | Intron1 | MFS transporter ( <i>T. equinum</i> )                                                                                                | 0    | 0    | 29    |
| TERG_01336T0 | Intron1 | small G-protein GPA2 ( <i>T. tonsurans</i> )                                                                                         | 0    | 0    | 13    |
| TERG_01356T0 | Intron2 | small G-protein GPA2 ( <i>T. tonsurans</i> )                                                                                         | 0    | 0    | 70    |
| TERG_01356T0 | Intron3 | small G-protein GPA2 ( <i>T. tonsurans</i> )                                                                                         | 0    | 0    | 571   |
| TERG_01359T0 | Intron1 | transketolase                                                                                                                        | 4985 | 0    | 18    |
| TERG_01359T3 | Intron3 | transketolase                                                                                                                        | 0    | 0    | 35    |
| TERG_01359T1 | Intron1 | transketolase                                                                                                                        | 9801 | 0    | 7     |
| TERG_01363T0 | Intron1 | SET domain-containing protein ( <i>T. equinum</i> )<br>ubiquinol-cytochrome C reductase complex subunit UcrQ ( <i>T. tonsurans</i> ) | 0    | 0    | 194   |
| TERG_01369T0 | Intron1 | ubiquinol-cytochrome C reductase complex subunit UcrQ ( <i>T. tonsurans</i> )                                                        | 0    | 0    | 65    |
| TERG_01369T0 | Intron2 | C6 finger domain-containing protein ( <i>T. equinum</i> )                                                                            | 0    | 0    | 193   |
| TERG_01384T0 | Intron1 | ABC multidrug transporter ( <i>T. tonsurans</i> )                                                                                    | 0    | 0    | 52    |
| TERG_01443T2 | Intron4 | ABC multidrug transporter ( <i>T. tonsurans</i> )                                                                                    | 0    | 0    | 67    |
| TERG_01443T0 | Intron5 | ABC multidrug transporter ( <i>T. tonsurans</i> )<br>C6 transcription factor, putative ( <i>T. verrucosum</i> )                      | 0    | 0    | 55    |
| TERG_01466T1 | Intron1 | cytochrome P450 monooxygenase, putative                                                                                              | 0    | 6288 | 0     |
| TERG_01467T0 | Intron1 | ( <i>A. benhamiae</i> )                                                                                                              | 0    | 0    | 73    |

|              |         |                                                                                           |        |        |       |
|--------------|---------|-------------------------------------------------------------------------------------------|--------|--------|-------|
| TERG_01477T0 | Intron1 | cwl1 ( <i>M. gypseum</i> )                                                                | 0      | 0      | 335   |
| TERG_01550T0 | Intron1 | 60S ribosomal protein L38 ( <i>T. tonsurans</i> )                                         | 0      | 0      | 79    |
| TERG_01560T0 | Intron1 | conserved eukaryotic protein ( <i>A. benhamiae</i> )                                      | 4325   | 0      | 0     |
| TERG_01564T1 | Intron1 | pyruvate carboxylase                                                                      | 4969   | 0      | 114   |
| TERG_01564T0 | Intron1 | pyruvate carboxylase                                                                      | 6938   | 0      | 76    |
| TERG_01599T1 | Intron1 | hypothetical protein                                                                      | 1906   | 0      | 375   |
| TERG_01604T0 | Intron2 | 60S ribosomal protein<br>CFEM domain protein, putative ( <i>A.</i>                        | 0      | 0      | 901   |
| TERG_01633T0 | Intron1 | <i>benhamiae</i> )<br>CFEM domain protein, putative ( <i>A.</i>                           | 0      | 0      | 32    |
| TERG_01633T0 | Intron2 | <i>benhamiae</i> )                                                                        | 941    | 0      | 150   |
| TERG_01660T0 | Intron2 | hypothetical protein                                                                      | 2782   | 0      | 12263 |
| TERG_01670T2 | Intron1 | isocitrate dehydrogenase [NAD] subunit 1,<br>mitochondrial                                | 0      | 0      | 45    |
| TERG_01670T0 | Intron3 | isocitrate dehydrogenase [NAD] subunit 1,<br>mitochondrial                                | 0      | 0      | 97    |
| TERG_01683T0 | Intron2 | hypothetical protein                                                                      | 0      | 0      | 45    |
| TERG_01694T0 | Intron2 | ankyrin repeat-containing protein ( <i>T.</i><br><i>equinum</i> )                         | 0      | 0      | 147   |
| TERG_01707T0 | Intron1 | hypothetical protein                                                                      | 0      | 0      | 265   |
| TERG_01800T1 | Intron1 | isopentenyl-diphosphate delta-isomerase                                                   | 0      | 0      | 13    |
| TERG_01800T2 | Intron1 | isopentenyl-diphosphate delta-isomerase                                                   | 0      | 0      | 59    |
| TERG_01877T1 | Intron3 | FAM96B ( <i>M. canis</i> )                                                                | 11105  | 21370  | 1600  |
| TERG_01883T0 | Intron1 | hsp75-like protein                                                                        | 3390   | 0      | 15    |
| TERG_01884T0 | Intron1 | hypothetical protein                                                                      | 16581  | 0      | 30    |
| TERG_01889T0 | Intron1 | RING finger domain-containing protein ( <i>T.</i><br><i>tonsurans</i> )                   | 0      | 0      | 1313  |
| TERG_01908T0 | Intron2 | hypothetical protein                                                                      | 0      | 0      | 61    |
| TERG_01950T0 | Intron1 | serine/threonine protein kinase ( <i>T.</i><br><i>tonsurans</i> )                         | 0      | 0      | 490   |
| TERG_01952T0 | Intron2 | 40S ribosomal protein S15                                                                 | 0      | 0      | 33    |
| TERG_01959T0 | Intron1 | RNA polymerase Rpb1 C-terminal repeat<br>domain-containing protein ( <i>T. equinum</i> )  | 0      | 0      | 1675  |
| TERG_01964T0 | Intron3 | cystathionine gamma-lyase ( <i>T. equinum</i> )                                           | 0      | 0      | 48    |
| TERG_01975T0 | Intron1 | hypothetical protein                                                                      | 0      | 0      | 89    |
| TERG_02012T0 | Intron1 | adenosine deaminase family protein ( <i>A.</i><br><i>benhamiae</i> )                      | 0      | 0      | 28    |
| TERG_02031T0 | Intron1 | methylenetetrahydrofolate dehydrogenase<br>( <i>T. equinum</i> )                          | 0      | 0      | 105   |
| TERG_02032T2 | Intron1 | ATP synthase subunit alpha, mitochondrial                                                 | 1897   | 0      | 0     |
| TERG_02032T1 | Intron1 | ATP synthase subunit alpha, mitochondrial                                                 | 1470   | 0      | 113   |
| TERG_02032T0 | Intron1 | ATP synthase subunit alpha, mitochondrial                                                 | 1761   | 0      | 12    |
| TERG_02071T0 | Intron1 | phosphoinositide-specific phospholipase C<br>( <i>T. equinum</i> )                        | 10159  | 0      | 159   |
| TERG_02071T0 | Intron2 | phosphoinositide-specific phospholipase C<br>( <i>T. equinum</i> )                        | 0      | 0      | 3755  |
| TERG_02071T0 | Intron3 | phosphoinositide-specific phospholipase C<br>( <i>T. equinum</i> )                        | 3084   | 0      | 820   |
| TERG_02078T0 | Intron1 | thiamine biosynthesis protein Nmt1 ( <i>T.</i><br><i>equinum</i> )                        | 0      | 0      | 213   |
| TERG_02104T0 | Intron2 | translation machinery-associated protein 22<br>GPI anchored protein, putative ( <i>A.</i> | 3401   | 0      | 76    |
| TERG_02118T1 | Intron3 | <i>benhamiae</i> )                                                                        | 6918   | 0      | 176   |
| TERG_02127T0 | Intron1 | sybindin-like family protein ( <i>T. tonsurans</i> )                                      | 567810 | 204318 | 1739  |
| TERG_02127T0 | Intron2 | sybindin-like family protein ( <i>T. tonsurans</i> )                                      | 10645  | 0      | 0     |
| TERG_02140T0 | Intron1 | bZIP transcription factor ( <i>T. tonsurans</i> )                                         | 32226  | 21371  | 2540  |

|              |         |                                                                             |        |         |      |
|--------------|---------|-----------------------------------------------------------------------------|--------|---------|------|
| TERG_02140T0 | Intron3 | bZIP transcription factor ( <i>T. tonsurans</i> )                           | 0      | 0       | 65   |
| TERG_02179T0 | Intron1 | keylime pathogenicity protein ( <i>M. canis</i> )                           | 5317   | 0       | 0    |
| TERG_02180T0 | Intron1 | hypothetical protein                                                        | 39343  | 12783   | 30   |
| TERG_02237T0 | Intron1 | 40S ribosomal protein S28                                                   | 0      | 0       | 36   |
| TERG_02250T0 | Intron1 | cyclopropane-fatty-acyl-phospholipid synthase ( <i>T. tonsurans</i> )       | 4392   | 0       | 0    |
| TERG_02250T1 | Intron1 | cyclopropane-fatty-acyl-phospholipid synthase ( <i>T. tonsurans</i> )       | 2572   | 0       | 0    |
| TERG_02253T0 | Intron1 | protein required for cell viability Rrp17, putative ( <i>A. benhamiae</i> ) | 1435   | 0       | 0    |
| TERG_02262T0 | Intron2 | NACHT and WD domain protein ( <i>T. verrucosum</i> )                        | 0      | 0       | 234  |
| TERG_02262T0 | Intron4 | NACHT and WD domain protein ( <i>T. verrucosum</i> )                        | 0      | 0       | 206  |
| TERG_02264T0 | Intron1 | hypothetical protein                                                        | 1453   | 0       | 18   |
| TERG_02269T0 | Intron1 | hypothetical protein                                                        | 4534   | 0       | 97   |
| TERG_02275T0 | Intron1 | hypothetical protein                                                        | 0      | 0       | 16   |
| TERG_02287T0 | Intron4 | calcium dependent mitochondrial carrier protein ( <i>T. tonsurans</i> )     | 49879  | 12364   | 891  |
| TERG_02312T0 | Intron1 | sister chromatid cohesion protein Dcc1, putative ( <i>A. benhamiae</i> )    | 6353   | 0       | 0    |
| TERG_02376T1 | Intron1 | 60S ribosomal protein ( <i>T. equinum</i> )                                 | 0      | 0       | 45   |
| TERG_02376T0 | Intron3 | 60S ribosomal protein ( <i>T. equinum</i> )                                 | 0      | 0       | 16   |
| TERG_02399T0 | Intron1 | RNA-directed RNA polymerase ( <i>T. tonsurans</i> )                         | 0      | 0       | 38   |
| TERG_02405T0 | Intron1 | mating locus protein, putative ( <i>T. verrucosum</i> )                     | 0      | 0       | 1600 |
| TERG_02413T0 | Intron1 | hypothetical protein                                                        | 0      | 0       | 180  |
| TERG_02428T0 | Intron1 | COX1 assembly protein ( <i>T. tonsurans</i> )                               | 0      | 0       | 896  |
| TERG_02438T1 | Intron1 | hypothetical protein                                                        | 7363   | 3554    | 0    |
| TERG_02438T0 | Intron1 | hypothetical protein                                                        | 3216   | 3888    | 0    |
| TERG_02441T0 | Intron1 | LYR family protein ( <i>M. canis</i> )                                      | 0      | 0       | 22   |
| TERG_02460T0 | Intron1 | hypothetical protein                                                        | 18158  | 10926   | 1375 |
| TERG_02488T0 | Intron1 | hypothetical protein                                                        | 0      | 3095    | 475  |
| TERG_02494T1 | Intron1 | nucleolar essential protein 1 ( <i>T. equinum</i> )                         | 3776   | 995     | 0    |
| TERG_02494T0 | Intron1 | nucleolar essential protein 1 ( <i>T. equinum</i> )                         | 3585   | 1540    | 0    |
| TERG_02519T0 | Intron1 | chitin synthase activator ( <i>T. equinum</i> )                             | 31447  | 18312   | 43   |
| TERG_02524T0 | Intron1 | proline-specific permease ( <i>T. equinum</i> )                             | 12938  | 2103    | 7    |
| TERG_02550T0 | Intron1 | ZZ type zinc finger domain protein ( <i>T. verrucosum</i> )                 | 421083 | 1422177 | 2864 |
| TERG_02551T1 | Intron1 | extensin ( <i>M. canis</i> )                                                | 7374   | 19960   | 150  |
| TERG_02551T0 | Intron1 | extensin ( <i>M. canis</i> )                                                | 5354   | 26418   | 376  |
| TERG_02591T0 | Intron1 | D-tyrosyl-tRNA(Tyr) deacylase                                               | 0      | 0       | 152  |
| TERG_02605T0 | Intron2 | CCCH zinc finger domain-containing protein ( <i>T. equinum</i> )            | 0      | 0       | 1841 |
| TERG_02624T0 | Intron1 | hypothetical protein                                                        | 0      | 0       | 14   |
| TERG_02634T0 | Intron1 | C2H2 finger domain protein, putative ( <i>A. benhamiae</i> )                | 0      | 0       | 143  |
| TERG_02637T2 | Intron1 | RING-14 protein ( <i>T. equinum</i> )                                       | 4311   | 0       | 1070 |
| TERG_02637T1 | Intron1 | RING-14 protein ( <i>T. equinum</i> )                                       | 0      | 0       | 64   |
| TERG_02637T0 | Intron1 | RING-14 protein ( <i>T. equinum</i> )                                       | 0      | 0       | 85   |
| TERG_02669T0 | Intron2 | pre-mRNA splicing factor ( <i>T. equinum</i> )                              | 0      | 0       | 30   |
| TERG_02670T0 | Intron2 | pre-mRNA splicing factor (Prp24), putative ( <i>T. verrucosum</i> )         | 0      | 0       | 104  |

|              |         |                                                                             |      |       |      |
|--------------|---------|-----------------------------------------------------------------------------|------|-------|------|
| TERG_02670T0 | Intron4 | pre-mRNA splicing factor (Prp24), putative ( <i>T. verrucosum</i> )         | 0    | 0     | 12   |
| TERG_02694T3 | Intron1 | sulfite efflux pump SSU1                                                    | 0    | 0     | 226  |
| TERG_02694T1 | Intron1 | sulfite efflux pump SSU1                                                    | 0    | 0     | 120  |
| TERG_02694T0 | Intron1 | sulfite efflux pump SSU1                                                    | 0    | 0     | 263  |
| TERG_02694T2 | Intron1 | sulfite efflux pump SSU1                                                    | 0    | 0     | 198  |
| TERG_02697T0 | Intron4 | G-patch domain-containing protein ( <i>T. tonsurans</i> )                   | 4939 | 0     | 0    |
| TERG_02709T0 | Intron2 | syntaxin 5 ( <i>T. tonsurans</i> )                                          | 0    | 0     | 26   |
| TERG_02760T0 | Intron1 | hypothetical protein                                                        | 0    | 0     | 37   |
| TERG_02761T0 | Intron1 | BUB protein kinase                                                          | 0    | 0     | 180  |
| TERG_02785T0 | Intron1 | hypothetical protein                                                        | 0    | 0     | 177  |
| TERG_02786T0 | Intron2 | ADP-ribosylation factor ( <i>T. tonsurans</i> )                             | 261  | 0     | 20   |
| TERG_02786T0 | Intron3 | ADP-ribosylation factor ( <i>T. tonsurans</i> )                             | 5824 | 0     | 94   |
| TERG_02897T0 | Intron3 | methylene-fatty-acyl-phospholipid synthase ( <i>T. equinum</i> )            | 0    | 0     | 23   |
| TERG_02906T0 | Intron1 | PAB1 binding protein ( <i>T. tonsurans</i> )                                | 0    | 0     | 42   |
| TERG_02937T0 | Intron1 | importin beta-4 subunit ( <i>T. tonsurans</i> )                             | 0    | 0     | 4543 |
| TERG_02937T1 | Intron2 | importin beta-4 subunit ( <i>T. tonsurans</i> )                             | 125  | 0     | 4153 |
| TERG_02960T0 | Intron6 | Beta-ketoacyl synthase ( <i>T. tonsurans</i> )                              | 0    | 0     | 55   |
| TERG_02977T0 | Intron1 | hypothetical protein                                                        | 6730 | 0     | 11   |
| TERG_02977T0 | Intron2 | hypothetical protein                                                        | 0    | 5176  | 0    |
| TERG_03014T0 | Intron2 | ER membrane protein Wsc4 ( <i>T. equinum</i> )                              | 0    | 0     | 781  |
| TERG_03038T0 | Intron2 | translation elongation factor Tu                                            | 4944 | 0     | 41   |
| TERG_03039T0 | Intron1 | Cytochrome b5 ( <i>T. tonsurans</i> )                                       | 4874 | 0     | 0    |
| TERG_03042T0 | Intron1 | STE/STE20/PAKA protein kinase                                               | 0    | 0     | 56   |
| TERG_03050T0 | Intron1 | tyrosine-tRNA ligase                                                        | 0    | 0     | 54   |
| TERG_03058T0 | Intron1 | zinc-binding oxidoreductase ToxD ( <i>T. tonsurans</i> )                    | 0    | 0     | 269  |
| TERG_03078T0 | Intron1 | cytochrome P450 oxidoreductase OrdA-like, putative ( <i>T. verrucosum</i> ) | 0    | 27548 | 169  |
| TERG_03085T0 | Intron4 | ATP-dependent RNA helicase DBP2                                             | 0    | 0     | 848  |
| TERG_03087T0 | Intron3 | C2H2 transcription factor (Con7), putative ( <i>A. benhamiae</i> )          | 1269 | 4683  | 228  |
| TERG_03097T0 | Intron2 | hypothetical protein                                                        | 0    | 0     | 409  |
| TERG_03151T0 | Intron1 | import inner membrane translocase subunit tim-21 ( <i>T. equinum</i> )      | 0    | 0     | 11   |
| TERG_03163T6 | Intron1 | eukaryotic translation initiation factor 4 gamma ( <i>M. gypseum</i> )      | 3562 | 3066  | 235  |
| TERG_03163T5 | Intron2 | eukaryotic translation initiation factor 4 gamma ( <i>M. gypseum</i> )      | 4479 | 6333  | 142  |
| TERG_03177T0 | Intron1 | RING finger domain protein, putative ( <i>A. benhamiae</i> )                | 1020 | 0     | 48   |
| TERG_03187T0 | Intron1 | aspartate aminotransferase ( <i>T. tonsurans</i> )                          | 0    | 0     | 49   |
| TERG_03190T0 | Intron1 | NADPH oxidase regulator NoxR ( <i>T. equinum</i> )                          | 263  | 0     | 0    |
| TERG_03196T0 | Intron1 | universal stress protein family domain protein ( <i>A. benhamiae</i> )      | 0    | 0     | 1581 |
| TERG_03206T0 | Intron1 | hsp7-like protein                                                           | 2748 | 0     | 42   |
| TERG_03240T0 | Intron1 | transmembrane efflux protein ( <i>T. tonsurans</i> )                        | 4064 | 0     | 0    |
| TERG_03302T0 | Intron1 | hypothetical protein                                                        | 0    | 0     | 395  |
| TERG_03319T1 | Intron2 | small nuclear ribonucleoprotein Sm D1 ( <i>T. tonsurans</i> )               | 0    | 0     | 57   |
| TERG_03343T0 | Intron1 | fatty acid desaturase ( <i>T. equinum</i> )                                 | 0    | 0     | 104  |

|              |         |                                                                   |       |       |       |
|--------------|---------|-------------------------------------------------------------------|-------|-------|-------|
| TERG_03459T0 | Intron1 | GDSL Lipase/Acylhydrolase family protein ( <i>A. benhamiae</i> )  | 40167 | 0     | 979   |
| TERG_03463T0 | Intron3 | hypothetical protein                                              | 0     | 0     | 310   |
| TERG_03473T0 | Intron1 | hypothetical protein                                              | 2218  | 0     | 0     |
| TERG_03497T0 | Intron2 | hemolysin-III family protein ( <i>T. equinum</i> )                | 1102  | 0     | 44    |
| TERG_03500T0 | Intron1 | urease accessory protein UreG                                     | 143   | 0     | 47    |
| TERG_03517T1 | Intron1 | cytochrome c oxidase subunit Vib ( <i>T. tonsurans</i> )          | 13510 | 35    | 0     |
| TERG_03517T0 | Intron2 | cytochrome c oxidase subunit Vib ( <i>T. tonsurans</i> )          | 2934  | 0     | 0     |
| TERG_03519T0 | Intron1 | peptidyl-prolyl cis-trans isomerase ( <i>T. tonsurans</i> )       | 5574  | 6648  | 481   |
| TERG_03528T2 | Intron1 | cytochrome c                                                      | 0     | 0     | 133   |
| TERG_03528T4 | Intron1 | cytochrome c                                                      | 0     | 0     | 133   |
| TERG_03528T5 | Intron1 | cytochrome c                                                      | 0     | 0     | 121   |
| TERG_03528T3 | Intron1 | cytochrome c                                                      | 0     | 0     | 109   |
| TERG_03531T0 | Intron1 | hypothetical protein                                              | 0     | 0     | 16    |
| TERG_03556T0 | Intron1 | transcriptional regulator Medusa ( <i>A. benhamiae</i> )          | 14981 | 46258 | 27698 |
| TERG_03559T0 | Intron1 | alcohol dehydrogenase ( <i>T. tonsurans</i> )                     | 0     | 0     | 714   |
| TERG_03569T0 | Intron1 | RING finger domain-containing protein ( <i>T. equinum</i> )       | 0     | 0     | 113   |
| TERG_03579T0 | Intron1 | MFS transporter ( <i>T. equinum</i> )                             | 305   | 0     | 0     |
| TERG_03579T1 | Intron1 | MFS transporter ( <i>T. equinum</i> )                             | 1390  | 0     | 0     |
| TERG_03579T3 | Intron1 | MFS transporter ( <i>T. equinum</i> )                             | 1367  | 0     | 17    |
| TERG_03579T4 | Intron1 | MFS transporter ( <i>T. equinum</i> )                             | 0     | 0     | 21    |
| TERG_03631T0 | Intron1 | sister chromatid cohesion factor ( <i>T. equinum</i> )            | 0     | 0     | 23    |
| TERG_03653T0 | Intron1 | hypothetical protein                                              | 3356  | 94    | 658   |
| TERG_03670T0 | Intron1 | hypothetical protein                                              | 0     | 0     | 112   |
| TERG_03695T0 | Intron1 | pyrroline-5-carboxylate reductase                                 | 0     | 0     | 12    |
| TERG_03706T0 | Intron1 | trichodiene oxygenase ( <i>T. equinum</i> )                       | 0     | 0     | 70    |
| TERG_03706T0 | Intron5 | trichodiene oxygenase ( <i>T. equinum</i> )                       | 0     | 0     | 37    |
| TERG_03706T0 | Intron8 | trichodiene oxygenase ( <i>T. equinum</i> )                       | 2354  | 0     | 40    |
| TERG_03735T0 | Intron1 | SAGA complex component Sgf29 ( <i>T. tonsurans</i> )              | 5486  | 0     | 29    |
| TERG_03736T0 | Intron6 | transcriptional corepressor Cyc8 ( <i>T. equinum</i> )            | 0     | 0     | 521   |
| TERG_03783T0 | Intron1 | siroheme synthase Met8 ( <i>T. tonsurans</i> )                    | 0     | 0     | 299   |
| TERG_03827T0 | Intron1 | hypothetical protein                                              | 0     | 0     | 96    |
| TERG_03835T0 | Intron2 | hypothetical protein                                              | 0     | 0     | 136   |
| TERG_03843T3 | Intron1 | chitin synthase B                                                 | 2023  | 0     | 83    |
| TERG_03843T2 | Intron1 | chitin synthase B                                                 | 3005  | 0     | 142   |
| TERG_03843T1 | Intron1 | chitin synthase B                                                 | 1054  | 0     | 209   |
| TERG_03843T0 | Intron1 | chitin synthase B                                                 | 2274  | 0     | 0     |
| TERG_03843T5 | Intron1 | chitin synthase B                                                 | 2346  | 0     | 158   |
| TERG_03843T4 | Intron1 | chitin synthase B                                                 | 2045  | 0     | 75    |
| TERG_03845T0 | Intron2 | hypothetical protein                                              | 19190 | 19489 | 337   |
| TERG_03872T2 | Intron4 | CMGC/MAPK/P38 protein kinase                                      | 0     | 0     | 148   |
| TERG_03880T0 | Intron1 | 60S ribosomal protein L5                                          | 11433 | 0     | 10    |
| TERG_03896T0 | Intron2 | mannose-6-phosphate isomerase                                     | 0     | 0     | 10    |
| TERG_03920T0 | Intron1 | protein kinase subdomain-containing protein ( <i>M. gypseum</i> ) | 0     | 0     | 14    |

|              |          |                                                                                                      |       |       |       |
|--------------|----------|------------------------------------------------------------------------------------------------------|-------|-------|-------|
| TERG_03933T0 | Intron5  | ABC metal ion transporter ( <i>T. equinum</i> )                                                      | 838   | 0     | 0     |
| TERG_03933T1 | Intron4  | ABC metal ion transporter ( <i>T. equinum</i> )                                                      | 23    | 0     | 0     |
| TERG_03933T2 | Intron5  | ABC metal ion transporter ( <i>T. equinum</i> )                                                      | 236   | 0     | 0     |
| TERG_03933T3 | Intron5  | ABC metal ion transporter ( <i>T. equinum</i> )                                                      | 875   | 0     | 0     |
| TERG_03933T4 | Intron5  | ABC metal ion transporter ( <i>T. equinum</i> )                                                      | 209   | 0     | 0     |
| TERG_03933T5 | Intron5  | ABC metal ion transporter ( <i>T. equinum</i> )                                                      | 225   | 0     | 0     |
| TERG_03933T1 | Intron4  | ABC metal ion transporter ( <i>T. equinum</i> )                                                      | 23    | 0     | 0     |
| TERG_03933T1 | Intron46 | ABC metal ion transporter ( <i>T. equinum</i> )                                                      | 23    | 0     | 0     |
| TERG_03974T0 | Intron1  | glycine-rich protein ( <i>T. tonsurans</i> )                                                         | 0     | 3644  | 32    |
| TERG_03995T0 | Intron2  | hypothetical protein                                                                                 | 2697  | 0     | 0     |
| TERG_04033T0 | Intron1  | 60S ribosomal protein L2                                                                             | 10615 | 0     | 465   |
| TERG_04095T1 | Intron1  | hypothetical protein                                                                                 | 84061 | 43455 | 177   |
| TERG_04095T0 | Intron1  | hypothetical protein                                                                                 | 75211 | 37121 | 355   |
| TERG_04112T0 | Intron1  | ADP-ribose pyrophosphatase ( <i>T. equinum</i> )                                                     | 0     | 764   | 383   |
| TERG_04112T0 | Intron2  | ADP-ribose pyrophosphatase ( <i>T. equinum</i> )                                                     | 0     | 6918  | 8481  |
| TERG_04112T0 | Intron3  | ADP-ribose pyrophosphatase ( <i>T. equinum</i> )<br>mitochondrial DNA replication protein            | 0     | 0     | 356   |
| TERG_04122T0 | Intron1  | YHM2                                                                                                 | 2504  | 0     | 0     |
| TERG_04154T0 | Intron1  | hypothetical protein                                                                                 | 0     | 0     | 26    |
| TERG_04157T0 | Intron1  | hypothetical protein                                                                                 | 32263 | 45231 | 47    |
| TERG_04208T0 | Intron1  | HAL protein kinase<br>TRAPP complex subunit Bet5 (predicted)                                         | 0     | 0     | 217   |
| TERG_04209T0 | Intron2  | ( <i>A. benhamiae</i> )                                                                              | 24395 | 818   | 95    |
| TERG_04229T2 | Intron2  | AP-1 complex subunit mu-1 ( <i>T. tonsurans</i> )<br>RNase III domain-containing protein ( <i>T.</i> | 0     | 0     | 12    |
| TERG_04230T0 | Intron1  | <i>equinum</i> )<br>succinate dehydrogenase, cytochrome b556                                         | 0     | 0     | 48    |
| TERG_04231T1 | Intron2  | subunit<br>succinate dehydrogenase, cytochrome b556                                                  | 0     | 0     | 950   |
| TERG_04231T0 | Intron1  | subunit                                                                                              | 0     | 0     | 531   |
| TERG_04234T1 | Intron1  | hydrophobin, putative ( <i>T. verrucosum</i> )                                                       | 0     | 0     | 49    |
| TERG_04234T0 | Intron1  | hydrophobin, putative ( <i>T. verrucosum</i> )                                                       | 0     | 0     | 65    |
| TERG_04237T0 | Intron1  | ceramide glucosyltransferase ( <i>T. tonsurans</i> )                                                 | 0     | 476   | 232   |
| TERG_04269T1 | Intron1  | hypothetical protein                                                                                 | 2064  | 41244 | 16174 |
| TERG_04269T0 | Intron1  | hypothetical protein                                                                                 | 3924  | 40537 | 16979 |
| TERG_04271T0 | Intron1  | hypothetical protein                                                                                 | 52734 | 3269  | 11796 |
| TERG_04277T0 | Intron1  | epoxide hydrolase ( <i>T. tonsurans</i> )<br>transcriptional regulator (Cti6), putative ( <i>T.</i>  | 1063  | 0     | 956   |
| TERG_04285T0 | Intron1  | <i>verrucosum</i> )                                                                                  | 30815 | 37690 | 86    |
| TERG_04289T0 | Intron1  | hypothetical protein<br>ab-hydrolase associated lipase, putative ( <i>A.</i>                         | 0     | 0     | 13    |
| TERG_04297T0 | Intron1  | <i>benhamiae</i> )                                                                                   | 0     | 0     | 30    |
| TERG_04309T0 | Intron3  | multidrug resistance protein ( <i>T. equinum</i> )                                                   | 0     | 0     | 1092  |
| TERG_04309T0 | Intron4  | multidrug resistance protein ( <i>T. equinum</i> )                                                   | 0     | 915   | 249   |
| TERG_04309T0 | Intron6  | multidrug resistance protein ( <i>T. equinum</i> )<br>staphylococcal nuclease domain-containing      | 0     | 0     | 31    |
| TERG_04333T0 | Intron1  | protein 1 ( <i>T. equinum</i> )                                                                      | 0     | 0     | 212   |
| TERG_04336T0 | Intron3  | transaldolase                                                                                        | 0     | 0     | 99    |
| TERG_04336T0 | Intron6  | transaldolase<br>alpha/beta hydrolase, putative ( <i>T.</i>                                          | 0     | 0     | 45    |
| TERG_04340T0 | Intron2  | <i>verrucosum</i> )<br>serine/threonine-protein phosphatase 2B                                       | 8820  | 0     | 1411  |
| TERG_04344T0 | Intron1  | catalytic subunit                                                                                    | 694   | 0     | 0     |

|              |         |                                                                                                 |       |       |       |
|--------------|---------|-------------------------------------------------------------------------------------------------|-------|-------|-------|
| TERG_04344T1 | Intron1 | serine/threonine-protein phosphatase 2B catalytic subunit                                       | 2278  | 0     | 0     |
| TERG_04346T0 | Intron2 | HSP70 family protein ( <i>A. benhamiae</i> )                                                    | 0     | 0     | 24    |
| TERG_04346T0 | Intron7 | HSP70 family protein ( <i>A. benhamiae</i> )                                                    | 0     | 0     | 18    |
| TERG_04356T0 | Intron3 | amino acid permease, putative ( <i>A. benhamiae</i> )                                           | 0     | 0     | 147   |
| TERG_04390T0 | Intron1 | NADH-ubiquinone oxidoreductase ( <i>T. tonsurans</i> )                                          | 0     | 0     | 23    |
| TERG_04395T0 | Intron3 | phosphotransferase enzyme family protein ( <i>T. equinum</i> )                                  | 0     | 0     | 36    |
| TERG_04399T0 | Intron3 | MFS transporter, putative ( <i>A. benhamiae</i> )                                               | 0     | 0     | 14    |
| TERG_04442T0 | Intron3 | hypothetical protein                                                                            | 0     | 10    | 46333 |
| TERG_04458T0 | Intron3 | RdgB/HAM1 family non-canonical purine NTP pyrophosphatase                                       | 0     | 0     | 1843  |
| TERG_04460T3 | Intron1 | nucleosome assembly protein Nap1 ( <i>T. equinum</i> )                                          | 0     | 0     | 54    |
| TERG_04469T0 | Intron1 | D-lactate dehydrogenase, putative ( <i>T. verrucosum</i> )                                      | 0     | 0     | 82    |
| TERG_04472T0 | Intron1 | hypothetical protein                                                                            | 6364  | 0     | 18    |
| TERG_04507T0 | Intron1 | dual specificity phosphatase ( <i>T. equinum</i> )                                              | 0     | 18093 | 292   |
| TERG_04535T0 | Intron3 | EMP24-GP25L family protein ( <i>T. equinum</i> )                                                | 5756  | 0     | 21    |
| TERG_04542T1 | Intron1 | translation initiation factor eIF4E3 ( <i>T. tonsurans</i> )                                    | 2681  | 0     | 27    |
| TERG_04542T2 | Intron1 | translation initiation factor eIF4E3 ( <i>T. tonsurans</i> )                                    | 1592  | 0     | 36    |
| TERG_04542T0 | Intron1 | translation initiation factor eIF4E3 ( <i>T. tonsurans</i> )                                    | 1111  | 0     | 7     |
| TERG_04558T0 | Intron2 | nucleoside diphosphate kinase                                                                   | 0     | 0     | 342   |
| TERG_04575T0 | Intron2 | transcription initiation factor TFIID subunit 6 ( <i>T. tonsurans</i> )                         | 0     | 0     | 19    |
| TERG_04587T1 | Intron2 | GPI anchored cell wall protein, putative ( <i>A. benhamiae</i> )                                | 0     | 0     | 23    |
| TERG_04592T0 | Intron2 | methionine aminopeptidase, type II                                                              | 0     | 0     | 22    |
| TERG_04594T0 | Intron1 | porin ( <i>T. tonsurans</i> )                                                                   | 0     | 0     | 173   |
| TERG_04595T4 | Intron1 | asparagine synthase (glutamine-hydrolyzing)                                                     | 0     | 0     | 23    |
| TERG_04601T0 | Intron1 | hypothetical protein                                                                            | 0     | 0     | 46    |
| TERG_04612T0 | Intron2 | branched-chain amino acid aminotransferase                                                      | 0     | 0     | 739   |
| TERG_04612T1 | Intron2 | branched-chain amino acid aminotransferase                                                      | 0     | 0     | 529   |
| TERG_04612T2 | Intron1 | branched-chain amino acid aminotransferase                                                      | 0     | 0     | 777   |
| TERG_04612T3 | Intron1 | branched-chain amino acid aminotransferase                                                      | 0     | 0     | 472   |
| TERG_04640T0 | Intron2 | phosphoethanolamine ( <i>T. tonsurans</i> )                                                     | 0     | 0     | 94    |
| TERG_04644T0 | Intron1 | mitochondrial carrier protein ( <i>T. tonsurans</i> )                                           | 0     | 0     | 45    |
| TERG_04663T0 | Intron1 | RNA polymerase II holoenzyme/mediator complex component Rgr1, putative ( <i>T. verrucosum</i> ) | 3495  | 0     | 0     |
| TERG_04677T0 | Intron1 | guanylate kinase                                                                                | 253   | 0     | 0     |
| TERG_04691T0 | Intron2 | nuclear division Rft1 protein, putative ( <i>T. verrucosum</i> )                                | 12491 | 12282 | 5896  |
| TERG_04697T0 | Intron1 | iron/copper transporter ( <i>T. tonsurans</i> )                                                 | 0     | 0     | 897   |
| TERG_04707T0 | Intron3 | cation transporter ChaC ( <i>T. tonsurans</i> )                                                 | 0     | 0     | 47    |
| TERG_04707T0 | Intron5 | cation transporter ChaC ( <i>T. tonsurans</i> )                                                 | 126   | 0     | 14    |
| TERG_04709T2 | Intron1 | glucose-6-phosphate 1-dehydrogenase                                                             | 799   | 0     | 59    |
| TERG_04709T4 | Intron1 | glucose-6-phosphate 1-dehydrogenase                                                             | 610   | 0     | 0     |
| TERG_04713T0 | Intron1 | cystathionine beta-synthase ( <i>T. tonsurans</i> )                                             | 0     | 0     | 35    |
| TERG_04717T0 | Intron2 | DUF431 domain-containing protein ( <i>T. equinum</i> )                                          | 0     | 0     | 60    |



|              |         |                                                                            |        |        |          |
|--------------|---------|----------------------------------------------------------------------------|--------|--------|----------|
| TERG_04726T0 | Intron2 | nuclear transcription factor Y subunit B-7 ( <i>T. equinum</i> )           | 2446   | 0      | 0        |
| TERG_04728T0 | Intron1 | nuclear transcription factor Y subunit B-7 ( <i>T. equinum</i> )           | 3392   | 0      | 0        |
| TERG_04733T0 | Intron1 | CAMK/CAMK1/CAMK1-CMK protein kinase                                        | 0      | 0      | 19       |
| TERG_04748T0 | Intron3 | V-type proton ATPase subunit F                                             | 0      | 0      | 11       |
| TERG_04777T0 | Intron1 | Exocyst complex component Sec3, putative ( <i>A. benhamiae</i> )           | 0      | 0      | 17       |
| TERG_04782T0 | Intron1 | 37S ribosomal protein Mrp10 ( <i>T. equinum</i> )                          | 0      | 0      | 69       |
| TERG_04782T1 | Intron2 | 37S ribosomal protein Mrp10 ( <i>T. equinum</i> )                          | 0      | 0      | 28       |
| TERG_04804T1 | Intron1 | ER-derived vesicles protein ERV14                                          | 0      | 0      | 42       |
| TERG_04828T0 | Intron1 | IZH family channel protein ( <i>T. tonsurans</i> )                         | 0      | 0      | 19       |
| TERG_04835T0 | Intron2 | 50S ribosomal protein L4 ( <i>T. tonsurans</i> )                           | 353    | 0      | 7832     |
| TERG_04842T0 | Intron1 | origin recognition complex subunit Orc4, putative ( <i>T. verrucosum</i> ) | 0      | 0      | 99       |
| TERG_04851T0 | Intron1 | Acyl CoA binding protein family protein ( <i>A. benhamiae</i> )            | 0      | 0      | 113      |
| TERG_04852T0 | Intron2 | U-box domain-containing protein ( <i>T. tonsurans</i> )                    | 10424  | 0      | 537      |
| TERG_04881T0 | Intron1 | hypothetical protein                                                       | 1254   | 0      | 11       |
| TERG_04906T0 | Intron1 | Cytochrome P450 61 ( <i>A. benhamiae</i> )                                 | 0      | 0      | 178      |
| TERG_04906T0 | Intron2 | Cytochrome P450 61 ( <i>A. benhamiae</i> )                                 | 0      | 0      | 44       |
| TERG_04946T1 | Intron1 | rho GTPase ModA ( <i>T. tonsurans</i> )                                    | 0      | 0      | 216      |
| TERG_04946T0 | Intron1 | rho GTPase ModA ( <i>T. tonsurans</i> )                                    | 0      | 0      | 181      |
| TERG_04985T0 | Intron2 | ATP synthase subunit F ( <i>T. tonsurans</i> )                             | 0      | 0      | 43       |
| TERG_04985T0 | Intron3 | ATP synthase subunit F ( <i>T. tonsurans</i> )                             | 0      | 0      | 62       |
| TERG_04992T2 | Intron1 | CTLH domain-containing protein ( <i>M. gypseum</i> )                       | 0      | 3071   | 2657     |
| TERG_04992T1 | Intron1 | CTLH domain-containing protein ( <i>M. gypseum</i> )                       | 22355  | 35307  | 19823093 |
| TERG_04992T1 | Intron2 | CTLH domain-containing protein ( <i>M. gypseum</i> )                       | 0      | 2666   | 2573     |
| TERG_04992T0 | Intron2 | CTLH domain-containing protein ( <i>M. gypseum</i> )                       | 25470  | 37793  | 19800588 |
| TERG_04992T0 | Intron3 | CTLH domain-containing protein ( <i>M. gypseum</i> )                       | 0      | 3312   | 2533     |
| TERG_05046T0 | Intron4 | hypothetical protein                                                       | 0      | 0      | 46       |
| TERG_05049T0 | Intron2 | nucleoside diphosphatase ( <i>T. tonsurans</i> )                           | 0      | 0      | 15       |
| TERG_05068T0 | Intron1 | hypothetical protein                                                       | 4107   | 10023  | 626      |
| TERG_05069T0 | Intron1 | GMF family protein ( <i>T. equinum</i> )                                   | 193919 | 129835 | 562      |
| TERG_05076T0 | Intron3 | COPI-coated vesicle protein ( <i>T. equinum</i> )                          | 0      | 0      | 83       |
| TERG_05090T3 | Intron1 | rho-gdp dissociation inhibitor ( <i>T. equinum</i> )                       | 0      | 0      | 79       |
| TERG_05090T0 | Intron1 | rho-gdp dissociation inhibitor ( <i>T. equinum</i> )                       | 0      | 0      | 139      |
| TERG_05090T1 | Intron1 | rho-gdp dissociation inhibitor ( <i>T. equinum</i> )                       | 0      | 0      | 134      |
| TERG_05090T5 | Intron1 | rho-gdp dissociation inhibitor ( <i>T. equinum</i> )                       | 0      | 0      | 365      |
| TERG_05146T0 | Intron3 | protein methyltransferase ( <i>T. tonsurans</i> )                          | 0      | 0      | 48       |
| TERG_05164T0 | Intron1 | mucin, putative ( <i>T. verrucosum</i> )                                   | 0      | 0      | 45       |
| TERG_05174T0 | Intron1 | acetyltransferase, GNAT family ( <i>T. verrucosum</i> )                    | 0      | 0      | 634      |
| TERG_05174T1 | Intron1 | acetyltransferase, GNAT family ( <i>T. verrucosum</i> )                    | 0      | 0      | 567      |
| TERG_05231T0 | Intron2 | glycerol-3-phosphate phosphatase ( <i>T. tonsurans</i> )                   | 0      | 0      | 15       |
| TERG_05231T0 | Intron3 | glycerol-3-phosphate phosphatase ( <i>T. tonsurans</i> )                   | 0      | 0      | 142      |

|              |         |                                                                             |       |        |      |
|--------------|---------|-----------------------------------------------------------------------------|-------|--------|------|
| TERG_05231T1 | Intron1 | glycerol-3-phosphate phosphatase ( <i>T. tonsurans</i> )                    | 0     | 0      | 103  |
| TERG_05244T0 | Intron1 | hypothetical protein                                                        | 5815  | 4562   | 50   |
| TERG_05248T0 | Intron1 | MFS multidrug transporter ( <i>T. tonsurans</i> )                           | 0     | 0      | 30   |
| TERG_05261T0 | Intron1 | karyopherin alpha subunit ( <i>T. tonsurans</i> )                           | 0     | 0      | 257  |
| TERG_05263T0 | Intron1 | CCCH zinc finger DNA binding protein ( <i>A. benhamiae</i> )                | 0     | 0      | 52   |
| TERG_05283T0 | Intron1 | 60S ribosomal protein L32                                                   | 5116  | 0      | 149  |
| TERG_05283T0 | Intron2 | 60S ribosomal protein L32                                                   | 0     | 0      | 321  |
| TERG_05297T0 | Intron1 | palmitoyltransferase pfa3 ( <i>T. equinum</i> )                             | 0     | 0      | 331  |
| TERG_05299T0 | Intron1 | glutathione S-transferase, putative ( <i>A. benhamiae</i> )                 | 39742 | 8591   | 1933 |
| TERG_05303T3 | Intron1 | phospholipase PldA, putative ( <i>T. verrucosum</i> )                       | 0     | 0      | 10   |
| TERG_05345T0 | Intron2 | 60S ribosomal protein L43                                                   | 0     | 0      | 144  |
| TERG_05345T0 | Intron3 | 60S ribosomal protein L43                                                   | 0     | 0      | 288  |
| TERG_05361T0 | Intron1 | cript family protein ( <i>T. tonsurans</i> )                                | 20937 | 184502 | 2319 |
| TERG_05361T0 | Intron2 | cript family protein ( <i>T. tonsurans</i> )                                | 0     | 0      | 109  |
| TERG_05393T0 | Intron1 | hypothetical protein                                                        | 0     | 0      | 142  |
| TERG_05420T0 | Intron1 | hypothetical protein                                                        | 0     | 0      | 71   |
| TERG_05428T0 | Intron1 | hypothetical protein                                                        | 0     | 0      | 60   |
| TERG_05430T0 | Intron1 | hypothetical protein                                                        | 0     | 0      | 28   |
| TERG_05443T0 | Intron1 | hypothetical protein                                                        | 13368 | 0      | 0    |
| TERG_05455T0 | Intron1 | C6 finger domain protein, putative ( <i>T. verrucosum</i> )                 | 15604 | 12620  | 264  |
| TERG_05475T0 | Intron1 | Got1 family protein ( <i>T. tonsurans</i> )                                 | 0     | 0      | 118  |
| TERG_05479T0 | Intron1 | bZIP transcription factor, putative ( <i>T. verrucosum</i> )                | 2847  | 19938  | 1510 |
| TERG_05483T0 | Intron1 | transcription elongation factor spt5 ( <i>M. gypseum</i> )                  | 0     | 0      | 97   |
| TERG_05495T0 | Intron1 | mannose-P-dolichol utilization defect 1 protein ( <i>T. equinum</i> )       | 0     | 0      | 69   |
| TERG_05509T0 | Intron2 | aldehyde dehydrogenase ALDH ( <i>A. benhamiae</i> )                         | 0     | 0      | 169  |
| TERG_05509T1 | Intron1 | aldehyde dehydrogenase ALDH ( <i>A. benhamiae</i> )                         | 0     | 0      | 43   |
| TERG_05511T0 | Intron1 | AT DNA binding protein ( <i>T. equinum</i> )                                | 0     | 0      | 52   |
| TERG_05512T0 | Intron2 | hypothetical protein                                                        | 0     | 0      | 36   |
| TERG_05528T0 | Intron1 | hypothetical protein                                                        | 2289  | 0      | 45   |
| TERG_05539T0 | Intron6 | Methyltransferase ( <i>T. tonsurans</i> )                                   | 0     | 6912   | 481  |
| TERG_05559T0 | Intron1 | hypothetical protein                                                        | 0     | 0      | 1423 |
| TERG_05562T0 | Intron4 | 2-hydroxychromene-2-carboxylate isomerase, putative ( <i>A. benhamiae</i> ) | 0     | 0      | 23   |
| TERG_05564T0 | Intron1 | hypothetical protein                                                        | 0     | 0      | 77   |
| TERG_05570T0 | Intron2 | WD repeat protein ( <i>T. tonsurans</i> )                                   | 0     | 0      | 172  |
| TERG_05576T0 | Intron1 | cell wall glucanase (Scw11), putative ( <i>A. benhamiae</i> )               | 3674  | 0      | 19   |
| TERG_05614T0 | Intron1 | nuclear protein export protein Yrb2, putative ( <i>T. verrucosum</i> )      | 2637  | 0      | 5    |
| TERG_05634T0 | Intron1 | mitochondrial protein ( <i>T. tonsurans</i> )                               | 0     | 0      | 51   |
| TERG_05634T1 | Intron1 | mitochondrial protein ( <i>T. tonsurans</i> )                               | 0     | 0      | 36   |
| TERG_05659T1 | Intron2 | hypothetical protein                                                        | 18787 | 0      | 13   |
| TERG_05659T1 | Intron4 | hypothetical protein                                                        | 0     | 0      | 81   |
| TERG_05673T0 | Intron1 | PaaI-thioesterase ( <i>T. equinum</i> )                                     | 0     | 0      | 76   |
| TERG_05673T0 | Intron4 | PaaI-thioesterase ( <i>T. equinum</i> )                                     | 0     | 0      | 26   |

|              |         |                                                                                     |       |       |      |
|--------------|---------|-------------------------------------------------------------------------------------|-------|-------|------|
| TERG_05690T4 | Intron1 | hypoxanthine guanine<br>phosphoribosyltransferase ( <i>T. tonsurans</i> )           | 0     | 0     | 60   |
| TERG_05690T2 | Intron1 | hypoxanthine guanine<br>phosphoribosyltransferase ( <i>T. tonsurans</i> )           | 0     | 0     | 25   |
| TERG_05690T1 | Intron1 | hypoxanthine guanine<br>phosphoribosyltransferase ( <i>T. tonsurans</i> )           | 0     | 0     | 18   |
| TERG_05690T0 | Intron1 | hypoxanthine guanine<br>phosphoribosyltransferase ( <i>T. tonsurans</i> )           | 0     | 0     | 12   |
| TERG_05695T0 | Intron1 | hypothetical protein<br>DUF625 domain-containing protein ( <i>T.</i>                | 0     | 0     | 1179 |
| TERG_05710T0 | Intron3 | <i>equinum</i> )                                                                    | 0     | 0     | 71   |
| TERG_05713T0 | Intron1 | hypothetical protein                                                                | 0     | 7737  | 1800 |
| TERG_05713T0 | Intron2 | hypothetical protein<br>AP-2 adaptor complex subunit mu ( <i>T.</i>                 | 11975 | 0     | 0    |
| TERG_05722T0 | Intron1 | <i>tonsurans</i> )                                                                  | 0     | 0     | 1229 |
| TERG_05724T0 | Intron1 | hypothetical protein                                                                | 38318 | 14747 | 378  |
| TERG_05728T0 | Intron1 | hypothetical protein<br>ubiquitin-conjugating enzyme E2 6 ( <i>T.</i>               | 0     | 0     | 38   |
| TERG_05729T1 | Intron1 | <i>equinum</i> )                                                                    | 0     | 0     | 480  |
| TERG_05729T0 | Intron2 | ubiquitin-conjugating enzyme E2 6 ( <i>T.</i>                                       | 0     | 0     | 354  |
| TERG_05740T0 | Intron1 | <i>equinum</i> )                                                                    | 0     | 0     | 30   |
| TERG_05753T1 | Intron1 | hypothetical protein<br>small GTP-binding protein ( <i>T. tonsurans</i> )           | 0     | 0     | 13   |
| TERG_05756T0 | Intron1 | calmodulin-binding protein Sha1, putative<br>( <i>T. verrucosum</i> )               | 0     | 0     | 35   |
| TERG_05799T0 | Intron5 | chlorophyll synthesis pathway protein BchC                                          | 0     | 0     | 28   |
| TERG_05801T0 | Intron1 | 60S ribosomal protein L15                                                           | 2156  | 0     | 147  |
| TERG_05821T2 | Intron4 | pyruvate kinase                                                                     | 0     | 0     | 47   |
| TERG_05821T0 | Intron4 | pyruvate kinase                                                                     | 0     | 0     | 19   |
| TERG_05825T0 | Intron1 | 40S ribosomal protein S11                                                           | 829   | 0     | 230  |
| TERG_05825T1 | Intron1 | 40S ribosomal protein S11                                                           | 1526  | 0     | 375  |
| TERG_05827T0 | Intron1 | sphingolipid long chain base-responsive<br>protein PIL1 ( <i>T. equinum</i> )       | 0     | 0     | 211  |
| TERG_05865T0 | Intron1 | integral membrane protein, Mpv17/PMP22<br>family, putative ( <i>T. verrucosum</i> ) | 0     | 0     | 34   |
| TERG_05865T1 | Intron1 | integral membrane protein, Mpv17/PMP22<br>family, putative ( <i>T. verrucosum</i> ) | 0     | 0     | 31   |
| TERG_05876T0 | Intron1 | hypothetical protein                                                                | 0     | 0     | 80   |
| TERG_05881T0 | Intron1 | hypothetical protein<br>C6 transcription factor, putative ( <i>T.</i>               | 0     | 0     | 31   |
| TERG_05882T0 | Intron1 | <i>verrucosum</i> )                                                                 | 0     | 0     | 37   |
| TERG_05882T0 | Intron3 | C6 transcription factor, putative ( <i>T.</i>                                       | 0     | 74    | 11   |
| TERG_05892T0 | Intron1 | <i>verrucosum</i> )                                                                 | 0     | 0     | 37   |
| TERG_05894T0 | Intron1 | hypothetical protein<br>peroxisomal AMP binding enzyme ( <i>T.</i>                  | 0     | 0     | 56   |
| TERG_05904T0 | Intron1 | <i>tonsurans</i> )                                                                  | 0     | 0     | 15   |
| TERG_05925T1 | Intron1 | CobW domain-containing protein ( <i>T.</i>                                          | 0     | 0     | 15   |
| TERG_05925T4 | Intron1 | EF-hand protein ( <i>T. tonsurans</i> )                                             | 0     | 877   | 655  |
| TERG_05925T5 | Intron1 | EF-hand protein ( <i>T. tonsurans</i> )                                             | 0     | 1200  | 366  |
| TERG_05926T0 | Intron1 | EF-hand protein ( <i>T. tonsurans</i> )                                             | 0     | 846   | 633  |
| TERG_05930T0 | Intron1 | C2H2 finger domain protein, putative ( <i>A.</i>                                    | 0     | 0     | 75   |
| TERG_05944T2 | Intron1 | <i>benhamiae</i> )                                                                  | 0     | 0     | 78   |
| TERG_05944T2 | Intron1 | 5-formyltetrahydrofolate cyclo-ligase<br>BAR domain-containing protein ( <i>T.</i>  | 1227  | 0     | 75   |
| TERG_05944T2 | Intron2 | <i>tonsurans</i> )                                                                  | 13556 | 2688  | 56   |

|              |         |                                                                                |       |       |      |
|--------------|---------|--------------------------------------------------------------------------------|-------|-------|------|
| TERG_05944T2 | Intron3 | BAR domain-containing protein ( <i>T. tonsurans</i> )                          | 0     | 0     | 72   |
| TERG_05944T1 | Intron1 | BAR domain-containing protein ( <i>T. tonsurans</i> )                          | 1648  | 0     | 67   |
| TERG_05944T1 | Intron2 | BAR domain-containing protein ( <i>T. tonsurans</i> )                          | 10727 | 1307  | 56   |
| TERG_05944T0 | Intron1 | BAR domain-containing protein ( <i>T. tonsurans</i> )                          | 3293  | 0     | 0    |
| TERG_05944T0 | Intron2 | BAR domain-containing protein ( <i>T. tonsurans</i> )                          | 10213 | 3034  | 3    |
| TERG_05955T0 | Intron2 | hypothetical protein                                                           | 0     | 0     | 28   |
| TERG_05965T0 | Intron3 | hypothetical protein                                                           | 0     | 0     | 551  |
| TERG_05970T0 | Intron1 | hypothetical protein                                                           | 0     | 0     | 634  |
| TERG_05989T0 | Intron1 | adenylosuccinate lyase                                                         | 0     | 0     | 56   |
| TERG_05996T0 | Intron2 | AT DNA binding protein ( <i>T. equinum</i> )                                   | 0     | 0     | 63   |
| TERG_05998T0 | Intron2 | chlorophyll synthesis pathway protein BchC                                     | 0     | 0     | 121  |
| TERG_06004T0 | Intron1 | hypothetical protein                                                           | 13538 | 7885  | 10   |
| TERG_06006T0 | Intron2 | hypothetical protein                                                           | 1470  | 0     | 65   |
| TERG_06012T0 | Intron1 | cytoplasm protein ( <i>T. equinum</i> )                                        | 0     | 0     | 28   |
| TERG_06023T0 | Intron1 | tripeptidyl peptidase SED3 ( <i>T. equinum</i> )                               | 0     | 0     | 69   |
| TERG_06025T0 | Intron1 | hypothetical protein                                                           | 0     | 0     | 45   |
| TERG_06025T0 | Intron2 | hypothetical protein                                                           | 0     | 0     | 1626 |
| TERG_06067T0 | Intron1 | Oxysterol-binding protein ( <i>T. equinum</i> )                                | 5223  | 0     | 50   |
| TERG_06067T0 | Intron4 | Oxysterol-binding protein ( <i>T. equinum</i> )                                | 0     | 0     | 48   |
| TERG_06072T0 | Intron1 | SH3 domain-containing protein ( <i>T. tonsurans</i> )                          | 0     | 0     | 52   |
| TERG_06076T0 | Intron2 | hypothetical protein                                                           | 133   | 2265  | 159  |
| TERG_06087T0 | Intron1 | mRNA export factor mex67 ( <i>T. equinum</i> )                                 | 0     | 0     | 70   |
| TERG_06094T1 | Intron1 | N-acetyltransferase ( <i>T. tonsurans</i> )                                    | 0     | 0     | 24   |
| TERG_06147T0 | Intron1 | pyridine nucleotide-disulfide oxidoreductase, putative ( <i>A. benhamiae</i> ) | 0     | 0     | 19   |
| TERG_06148T0 | Intron1 | protein vts1                                                                   | 0     | 0     | 462  |
| TERG_06151T0 | Intron1 | pyridoxine kinase ( <i>T. equinum</i> )                                        | 26103 | 10082 | 115  |
| TERG_06151T0 | Intron2 | pyridoxine kinase ( <i>T. equinum</i> )                                        | 4530  | 0     | 228  |
| TERG_06153T0 | Intron1 | hypothetical protein                                                           | 40236 | 8198  | 219  |
| TERG_06155T0 | Intron1 | phosphotransferase ( <i>T. tonsurans</i> )                                     | 609   | 0     | 0    |
| TERG_06157T0 | Intron4 | ATP synthase F1 epsilon subunit ( <i>T. equinum</i> )                          | 0     | 0     | 73   |
| TERG_06182T1 | Intron3 | topoisomerase I ( <i>T. equinum</i> )                                          | 0     | 0     | 15   |
| TERG_06196T0 | Intron1 | hypothetical protein                                                           | 0     | 0     | 83   |
| TERG_06204T0 | Intron4 | phosphatase methylesterase ( <i>T. equinum</i> )                               | 0     | 0     | 45   |
| TERG_06211T0 | Intron1 | DUF498 domain-containing protein ( <i>T. equinum</i> )                         | 0     | 0     | 34   |
| TERG_06236T0 | Intron1 | 40S ribosomal protein S19                                                      | 0     | 0     | 322  |
| TERG_06239T0 | Intron1 | hypothetical protein                                                           | 0     | 0     | 1978 |
| TERG_06242T0 | Intron1 | glucanase, putative ( <i>T. verrucosum</i> )                                   | 0     | 0     | 24   |
| TERG_06255T0 | Intron1 | oligosaccharyl transferase subunit Dad1 ( <i>T. tonsurans</i> )                | 0     | 0     | 104  |
| TERG_06269T0 | Intron1 | hypothetical protein                                                           | 0     | 0     | 202  |
| TERG_06270T0 | Intron3 | hypothetical protein                                                           | 0     | 0     | 12   |
| TERG_06273T0 | Intron1 | hypothetical protein                                                           | 0     | 0     | 40   |
| TERG_06275T0 | Intron2 | 40S ribosomal protein                                                          | 0     | 0     | 165  |
| TERG_06283T0 | Intron1 | cyclohexanone 1,2-monooxygenase ( <i>T. tonsurans</i> )                        | 0     | 0     | 405  |

|              |         |                                                                      |        |       |      |
|--------------|---------|----------------------------------------------------------------------|--------|-------|------|
| TERG_06293T0 | Intron2 | vacuolar sorting protein ( <i>T. tonsurans</i> )                     | 0      | 0     | 1287 |
| TERG_06295T0 | Intron1 | C2H2 finger domain-containing protein ( <i>T. tonsurans</i> )        | 98749  | 50894 | 7    |
| TERG_06296T1 | Intron1 | hypothetical protein                                                 | 0      | 0     | 14   |
| TERG_06296T1 | Intron2 | hypothetical protein                                                 | 0      | 0     | 73   |
| TERG_06307T0 | Intron2 | ubiquitin conjugating enzyme ( <i>T. tonsurans</i> )                 | 1347   | 0     | 0    |
| TERG_06308T1 | Intron1 | XPG I-region protein ( <i>M. gypseum</i> )                           | 0      | 0     | 128  |
| TERG_06331T0 | Intron1 | increased rDNA silencing protein IRS4 ( <i>T. equinum</i> )          | 102043 | 42391 | 337  |
| TERG_06352T0 | Intron1 | HAL protein kinase                                                   | 0      | 0     | 91   |
| TERG_06381T0 | Intron1 | hypothetical protein                                                 | 13952  | 12032 | 151  |
| TERG_06387T0 | Intron1 | PAS2 ( <i>T. equinum</i> )                                           | 0      | 0     | 523  |
| TERG_06390T0 | Intron1 | sulfite reductase flavoprotein alpha-component ( <i>T. equinum</i> ) | 1446   | 0     | 0    |
| TERG_06390T2 | Intron1 | sulfite reductase flavoprotein alpha-component ( <i>T. equinum</i> ) | 880    | 0     | 33   |
| TERG_06392T0 | Intron3 | calmodulin                                                           | 0      | 0     | 41   |
| TERG_06406T0 | Intron1 | hypothetical protein                                                 | 0      | 0     | 67   |
| TERG_06406T0 | Intron2 | hypothetical protein                                                 | 0      | 0     | 33   |
| TERG_06436T0 | Intron1 | AAL017W ( <i>M. canis</i> )                                          | 0      | 0     | 51   |
| TERG_06472T0 | Intron2 | ketoreductase ( <i>T. tonsurans</i> )                                | 0      | 0     | 491  |
| TERG_06475T0 | Intron1 | zinc knuckle domain-containing protein ( <i>T. tonsurans</i> )       | 1373   | 0     | 0    |
| TERG_06475T0 | Intron3 | zinc knuckle domain-containing protein ( <i>T. tonsurans</i> )       | 1351   | 0     | 928  |
| TERG_06475T1 | Intron1 | zinc knuckle domain-containing protein ( <i>T. tonsurans</i> )       | 692    | 0     | 21   |
| TERG_06475T1 | Intron3 | zinc knuckle domain-containing protein ( <i>T. tonsurans</i> )       | 982    | 0     | 955  |
| TERG_06475T1 | Intron5 | zinc knuckle domain-containing protein ( <i>T. tonsurans</i> )       | 0      | 0     | 356  |
| TERG_06475T2 | Intron1 | zinc knuckle domain-containing protein ( <i>T. tonsurans</i> )       | 341    | 0     | 0    |
| TERG_06475T2 | Intron3 | zinc knuckle domain-containing protein ( <i>T. tonsurans</i> )       | 0      | 0     | 799  |
| TERG_06475T2 | Intron5 | zinc knuckle domain-containing protein ( <i>T. tonsurans</i> )       | 0      | 0     | 251  |
| TERG_06493T0 | Intron1 | mRNA cleavage factor complex component Pcf11 ( <i>T. equinum</i> )   | 0      | 0     | 8747 |
| TERG_06521T0 | Intron1 | hypothetical protein                                                 | 0      | 0     | 96   |
| TERG_06528T0 | Intron1 | Delta(24(24(1)))-sterol reductase ( <i>T. equinum</i> )              | 0      | 0     | 75   |
| TERG_06540T0 | Intron1 | glutathione transferase ( <i>T. tonsurans</i> )                      | 0      | 0     | 675  |
| TERG_06568T0 | Intron1 | phosphoserine transaminase                                           | 0      | 0     | 224  |
| TERG_06587T0 | Intron1 | Snf1 kinase complex beta-subunit Gal83 ( <i>T. tonsurans</i> )       | 0      | 0     | 172  |
| TERG_06601T0 | Intron1 | flavin-containing amine oxidasedehydrogenase ( <i>T. equinum</i> )   | 0      | 0     | 105  |
| TERG_06614T1 | Intron1 | formate dehydrogenase                                                | 0      | 0     | 47   |
| TERG_06614T1 | Intron2 | formate dehydrogenase                                                | 0      | 2483  | 123  |
| TERG_06614T2 | Intron1 | formate dehydrogenase                                                | 0      | 1150  | 185  |
| TERG_06614T3 | Intron2 | formate dehydrogenase                                                | 0      | 1269  | 136  |
| TERG_06614T0 | Intron1 | formate dehydrogenase                                                | 0      | 1792  | 38   |
| TERG_06620T3 | Intron2 | NADH-ubiquinone oxidoreductase B14 subunit ( <i>T. equinum</i> )     | 0      | 0     | 153  |
| TERG_06620T1 | Intron2 | NADH-ubiquinone oxidoreductase B14 subunit ( <i>T. equinum</i> )     | 0      | 0     | 56   |

|              |         |                                                                                                         |        |        |       |
|--------------|---------|---------------------------------------------------------------------------------------------------------|--------|--------|-------|
| TERG_06622T0 | Intron5 | hydrolase ( <i>T. tonsurans</i> )                                                                       | 0      | 0      | 1220  |
| TERG_06640T1 | Intron1 | phosphoribosylamine-glycine ligase<br>glycosyl transferase, putative ( <i>T.</i><br><i>verrucosum</i> ) | 0      | 0      | 71    |
| TERG_06644T0 | Intron2 | MFS monocarboxylate transporter, putative<br>( <i>A. benhamiae</i> )                                    | 0      | 1079   | 42    |
| TERG_06650T0 | Intron2 | peptidyl-prolyl cis-trans isomerase cyp15 ( <i>T.</i><br><i>equinum</i> )                               | 0      | 0      | 59    |
| TERG_06655T0 | Intron2 |                                                                                                         | 0      | 0      | 51    |
| TERG_06665T0 | Intron3 | serine carboxypeptidase ( <i>T. tonsurans</i> )                                                         | 0      | 0      | 18    |
| TERG_06667T0 | Intron1 | hypothetical protein                                                                                    | 0      | 644    | 0     |
| TERG_06681T0 | Intron1 | glycogen debranching enzyme                                                                             | 0      | 0      | 46    |
| TERG_06686T3 | Intron1 | hypothetical protein                                                                                    | 0      | 226    | 112   |
| TERG_06686T2 | Intron1 | hypothetical protein                                                                                    | 0      | 693    | 181   |
| TERG_06686T1 | Intron1 | hypothetical protein                                                                                    | 0      | 832    | 221   |
| TERG_06701T0 | Intron1 | gamma-glutamyltransferase                                                                               | 0      | 0      | 70    |
| TERG_06725T1 | Intron1 | non-histone chromosomal protein 6                                                                       | 45998  | 10334  | 1582  |
| TERG_06725T1 | Intron5 | non-histone chromosomal protein 6                                                                       | 68870  | 49473  | 92048 |
| TERG_06725T2 | Intron1 | non-histone chromosomal protein 6                                                                       | 42086  | 6818   | 1823  |
| TERG_06725T3 | Intron1 | non-histone chromosomal protein 6                                                                       | 82526  | 34631  | 3054  |
| TERG_06752T0 | Intron2 | serine/threonine protein kinase ( <i>T.</i><br><i>tonsurans</i> )                                       | 0      | 0      | 2772  |
| TERG_06753T0 | Intron2 | hypothetical protein                                                                                    | 0      | 0      | 308   |
| TERG_06768T0 | Intron1 | pre-mRNA-splicing ATP-dependent RNA<br>helicase PRP28                                                   | 0      | 1941   | 18    |
| TERG_06773T0 | Intron3 | mRNA splicing protein ( <i>T. tonsurans</i> )                                                           | 0      | 0      | 157   |
| TERG_06779T0 | Intron1 | hypothetical protein                                                                                    | 0      | 0      | 40    |
| TERG_06788T0 | Intron2 | zinc/iron transporter ( <i>T. equinum</i> )                                                             | 0      | 0      | 29    |
| TERG_06804T0 | Intron1 | cgi121 ( <i>T. equinum</i> )                                                                            | 0      | 0      | 242   |
| TERG_06810T0 | Intron1 | hypothetical protein                                                                                    | 0      | 0      | 43    |
| TERG_06816T0 | Intron2 | 14-3-3 family protein ( <i>T. tonsurans</i> )                                                           | 0      | 0      | 330   |
| TERG_06824T0 | Intron2 | 60S ribosomal protein L23                                                                               | 3145   | 0      | 139   |
| TERG_06837T0 | Intron1 | membrane transporter ( <i>T. tonsurans</i> )                                                            | 0      | 0      | 228   |
| TERG_06844T1 | Intron2 | 40S ribosomal protein S21                                                                               | 0      | 0      | 109   |
| TERG_06846T0 | Intron2 | inosine-5'-monophosphate dehydrogenase                                                                  | 0      | 9285   | 3792  |
| TERG_06865T0 | Intron1 | hypothetical protein                                                                                    | 34374  | 47913  | 1765  |
| TERG_06875T0 | Intron1 | hypothetical protein                                                                                    | 0      | 0      | 51    |
| TERG_06880T0 | Intron1 | MFS transporter Fmp42, putative ( <i>T.</i><br><i>verrucosum</i> )                                      | 0      | 0      | 158   |
| TERG_06883T0 | Intron4 | NAD dependent epimerase/dehydratase<br>family protein ( <i>T. verrucosum</i> )                          | 0      | 0      | 116   |
| TERG_06884T0 | Intron3 | C6 transcription factor (War1), putative ( <i>T.</i><br><i>verrucosum</i> )                             | 3544   | 0      | 41    |
| TERG_06898T0 | Intron2 | ABC bile acid transporter, putative ( <i>T.</i><br><i>verrucosum</i> )                                  | 0      | 0      | 19    |
| TERG_06908T0 | Intron1 | raffinose synthase protein Sip1, putative ( <i>T.</i><br><i>verrucosum</i> )                            | 0      | 0      | 58    |
| TERG_06926T0 | Intron1 | chitinase ( <i>T. equinum</i> )                                                                         | 0      | 0      | 83    |
| TERG_06965T1 | Intron1 | hypothetical protein                                                                                    | 0      | 0      | 100   |
| TERG_06965T0 | Intron1 | hypothetical protein                                                                                    | 361118 | 181279 | 1240  |
| TERG_06965T0 | Intron2 | hypothetical protein                                                                                    | 0      | 0      | 151   |
| TERG_07015T0 | Intron2 | MFS transporter, putative ( <i>T. verrucosum</i> )                                                      | 0      | 0      | 80    |
| TERG_07064T1 | Intron1 | cytochrome P450 pisatin demethylase,<br>putative ( <i>T. verrucosum</i> )                               | 0      | 0      | 409   |
| TERG_07069T0 | Intron1 | carbonic anhydrase ( <i>T. tonsurans</i> )                                                              | 0      | 0      | 65    |

|              |         |                                                                                        |        |        |       |
|--------------|---------|----------------------------------------------------------------------------------------|--------|--------|-------|
| TERG_07085T1 | Intron1 | peptidase ( <i>T. tonsurans</i> )                                                      | 0      | 0      | 42    |
| TERG_07099T0 | Intron1 | hypothetical protein<br>BAP31 domain-containing protein ( <i>T.</i>                    | 95292  | 12258  | 8     |
| TERG_07103T1 | Intron3 | <i>equinum</i> )                                                                       | 0      | 0      | 43    |
| TERG_07105T0 | Intron1 | transcription factor TFIIA complex subunit<br>Toa1, putative ( <i>T. verrucosum</i> )  | 76     | 0      | 177   |
| TERG_07105T0 | Intron2 | transcription factor TFIIA complex subunit<br>Toa1, putative ( <i>T. verrucosum</i> )  | 195533 | 223651 | 251   |
| TERG_07135T0 | Intron1 | hypothetical protein                                                                   | 16331  | 0      | 5140  |
| TERG_07136T0 | Intron5 | Rab geranylgeranyltransferase, beta subunit<br>( <i>A. benhamiae</i> )                 | 0      | 0      | 254   |
| TERG_07156T1 | Intron1 | transcription regulator BDF1, putative ( <i>A.</i><br><i>benhamiae</i> )               | 2780   | 29489  | 192   |
| TERG_07156T3 | Intron1 | transcription regulator BDF1, putative ( <i>A.</i><br><i>benhamiae</i> )               | 4033   | 27532  | 247   |
| TERG_07156T0 | Intron1 | transcription regulator BDF1, putative ( <i>A.</i><br><i>benhamiae</i> )               | 0      | 1652   | 91    |
| TERG_07159T2 | Intron3 | geranylgeranyl transferase type II alpha<br>subunit, putative ( <i>T. verrucosum</i> ) | 0      | 0      | 1090  |
| TERG_07178T0 | Intron1 | synaptic glycoprotein SC2 ( <i>T. equinum</i> )                                        | 0      | 0      | 74    |
| TERG_07178T0 | Intron2 | synaptic glycoprotein SC2 ( <i>T. equinum</i> )                                        | 0      | 0      | 285   |
| TERG_07205T0 | Intron2 | NADH-ubiquinone oxidoreductase 51 kDa<br>subunit, mitochondrial                        | 0      | 0      | 41    |
| TERG_07233T0 | Intron2 | acriflavine sensitivity control protein acr-2<br>( <i>T. equinum</i> )                 | 0      | 0      | 29    |
| TERG_07250T0 | Intron1 | cell surface receptor/MFS transporter ( <i>T.</i><br><i>equinum</i> )                  | 11099  | 0      | 14    |
| TERG_07279T0 | Intron1 | RNA polymerase II transcription factor B<br>subunit 1 ( <i>T. equinum</i> )            | 0      | 0      | 32    |
| TERG_07283T0 | Intron6 | GABA permease ( <i>T. equinum</i> )                                                    | 0      | 0      | 76    |
| TERG_07288T0 | Intron1 | hypothetical protein                                                                   | 0      | 0      | 173   |
| TERG_07295T0 | Intron1 | C6 finger domain protein, putative ( <i>T.</i><br><i>verrucosum</i> )                  | 45952  | 22111  | 354   |
| TERG_07334T0 | Intron2 | HIT domain-containing protein ( <i>T. equinum</i> )                                    | 0      | 0      | 419   |
| TERG_07339T0 | Intron1 | WD repeat-containing protein ( <i>T. tonsurans</i> )                                   | 0      | 0      | 39    |
| TERG_07347T1 | Intron1 | La domain family ( <i>T. verrucosum</i> )                                              | 0      | 0      | 17    |
| TERG_07347T0 | Intron1 | La domain family ( <i>T. verrucosum</i> )                                              | 4080   | 7150   | 48    |
| TERG_07351T0 | Intron1 | hypothetical protein                                                                   | 1715   | 0      | 4055  |
| TERG_07351T0 | Intron2 | hypothetical protein                                                                   | 235    | 0      | 22679 |
| TERG_07357T0 | Intron1 | hypothetical protein                                                                   | 0      | 0      | 35    |
| TERG_07367T0 | Intron1 | CMGC/CDK/CDK8 protein kinase<br>ADP-ribosylation factor-binding protein                | 1048   | 11412  | 249   |
| TERG_07371T0 | Intron2 | GGA2 ( <i>M. gypseum</i> )                                                             | 0      | 0      | 29    |
| TERG_07371T0 | Intron7 | ADP-ribosylation factor-binding protein<br>GGA2 ( <i>M. gypseum</i> )                  | 0      | 0      | 53    |
| TERG_07380T0 | Intron1 | 40S ribosomal protein S26E                                                             | 0      | 0      | 26    |
| TERG_07380T0 | Intron3 | 40S ribosomal protein S26E                                                             | 0      | 0      | 13    |
| TERG_07380T1 | Intron1 | 40S ribosomal protein S26E                                                             | 0      | 0      | 10    |
| TERG_07384T0 | Intron1 | hypothetical protein                                                                   | 3695   | 0      | 36    |
| TERG_07395T2 | Intron3 | WD repeat protein ( <i>T. tonsurans</i> )                                              | 0      | 0      | 31    |
| TERG_07402T0 | Intron1 | hypothetical protein                                                                   | 0      | 0      | 57    |
| TERG_07417T0 | Intron1 | hypothetical protein                                                                   | 0      | 0      | 21    |
| TERG_07418T0 | Intron1 | MFS multidrug transporter ( <i>T. equinum</i> )                                        | 0      | 0      | 40    |
| TERG_07447T0 | Intron1 | hypothetical protein                                                                   | 0      | 0      | 48    |
| TERG_07456T0 | Intron1 | cell wall protein PhiA ( <i>T. equinum</i> )                                           | 0      | 0      | 36    |

|              |         |                                                                                   |       |       |       |
|--------------|---------|-----------------------------------------------------------------------------------|-------|-------|-------|
| TERG_07458T0 | Intron1 | SAGA-like transcriptional regulatory complex subunit Spt3 ( <i>T. tonsurans</i> ) | 0     | 0     | 24    |
| TERG_07467T0 | Intron1 | DUF292 domain containing protein ( <i>M. gypseum</i> )                            | 6609  | 0     | 74    |
| TERG_07482T0 | Intron2 | ribonuclease H1, putative ( <i>A. benhamiae</i> )                                 | 0     | 0     | 260   |
| TERG_07492T0 | Intron2 | sugar transporter STL1 ( <i>T. tonsurans</i> )                                    | 0     | 0     | 34    |
| TERG_07493T0 | Intron1 | Zinc knuckle transcription factor (CnjB) ( <i>T. tonsurans</i> )                  | 0     | 0     | 643   |
| TERG_07493T0 | Intron1 | Zinc knuckle transcription factor (CnjB) ( <i>T. tonsurans</i> )                  | 0     | 0     | 643   |
| TERG_07508T0 | Intron5 | hypothetical protein                                                              | 0     | 0     | 40    |
| TERG_07511T0 | Intron1 | hypothetical protein                                                              | 121   | 0     | 50    |
| TERG_07542T0 | Intron2 | hypothetical protein                                                              | 0     | 0     | 410   |
| TERG_07555T0 | Intron1 | CAMKK protein kinase                                                              | 1838  | 0     | 7     |
| TERG_07575T0 | Intron1 | CK1/CK1/CK1-G protein kinase                                                      | 0     | 0     | 43    |
| TERG_07575T1 | Intron1 | CK1/CK1/CK1-G protein kinase                                                      | 0     | 0     | 10    |
| TERG_07575T2 | Intron1 | CK1/CK1/CK1-G protein kinase                                                      | 0     | 0     | 39    |
| TERG_07576T0 | Intron1 | histone chaperone RTT106 ( <i>T. tonsurans</i> )                                  | 3218  | 0     | 117   |
| TERG_07599T0 | Intron1 | cell morphogenesis protein Sog2 ( <i>T. tonsurans</i> )                           | 0     | 0     | 31    |
| TERG_07636T0 | Intron1 | dual specificity phosphatase ( <i>T. tonsurans</i> )                              | 7612  | 7238  | 1147  |
| TERG_07636T0 | Intron2 | dual specificity phosphatase ( <i>T. tonsurans</i> )                              | 0     | 0     | 87    |
| TERG_07638T0 | Intron1 | sphingolipid desaturase ( <i>T. tonsurans</i> )                                   | 2061  | 0     | 5     |
| TERG_07643T0 | Intron1 | ubiquinol-cytochrome c reductase complex protein ( <i>T. equinum</i> )            | 0     | 0     | 240   |
| TERG_07664T1 | Intron2 | rho GTPase activator Rga ( <i>T. equinum</i> )                                    | 0     | 0     | 356   |
| TERG_07678T1 | Intron1 | endoribonuclease L-PSP ( <i>T. tonsurans</i> )                                    | 0     | 0     | 97    |
| TERG_07678T1 | Intron2 | endoribonuclease L-PSP ( <i>T. tonsurans</i> )                                    | 3287  | 8572  | 1186  |
| TERG_07678T0 | Intron1 | endoribonuclease L-PSP ( <i>T. tonsurans</i> )                                    | 0     | 0     | 61    |
| TERG_07678T0 | Intron2 | endoribonuclease L-PSP ( <i>T. tonsurans</i> )                                    | 2300  | 2197  | 183   |
| TERG_07684T0 | Intron1 | hypothetical protein                                                              | 1494  | 0     | 310   |
| TERG_07692T0 | Intron1 | hypothetical protein                                                              | 49238 | 54671 | 104   |
| TERG_07719T0 | Intron4 | hypothetical protein                                                              | 15712 | 65655 | 48    |
| TERG_07797T0 | Intron1 | amino acid permease ( <i>T. equinum</i> )                                         | 3432  | 0     | 0     |
| TERG_07797T0 | Intron2 | amino acid permease ( <i>T. equinum</i> )                                         | 9028  | 0     | 131   |
| TERG_07810T0 | Intron1 | phospholipase ( <i>T. tonsurans</i> )                                             | 82    | 0     | 251   |
| TERG_07824T0 | Intron1 | BRCT domain-containing protein ( <i>T. equinum</i> )                              | 0     | 0     | 532   |
| TERG_07837T0 | Intron1 | ribosomal protein S16                                                             | 0     | 0     | 19    |
| TERG_07837T0 | Intron2 | ribosomal protein S16                                                             | 0     | 0     | 103   |
| TERG_07849T0 | Intron2 | long-chain-fatty-acid-CoA ligase, putative ( <i>T. verrucosum</i> )               | 10975 | 44896 | 2068  |
| TERG_07849T4 | Intron1 | long-chain-fatty-acid-CoA ligase, putative ( <i>T. verrucosum</i> )               | 12618 | 54021 | 2502  |
| TERG_07862T0 | Intron1 | dynein light intermediate chain ( <i>T. tonsurans</i> )                           | 0     | 0     | 33    |
| TERG_07875T0 | Intron1 | integral membrane protein ( <i>T. equinum</i> )                                   | 0     | 392   | 97    |
| TERG_07889T0 | Intron3 | G2/M phase checkpoint control protein Sum2 ( <i>T. tonsurans</i> )                | 0     | 0     | 109   |
| TERG_07931T0 | Intron2 | vesicle-mediated transport protein Vid24 ( <i>T. equinum</i> )                    | 0     | 0     | 117   |
| TERG_07932T0 | Intron6 | vesicle-mediated transport protein Vid24, putative ( <i>T. verrucosum</i> )       | 0     | 0     | 108   |
| TERG_07943T0 | Intron2 | hypothetical protein                                                              | 0     | 0     | 35846 |
| TERG_07960T0 | Intron1 | hypothetical protein                                                              | 0     | 0     | 219   |



|              |         |                                                                                              |        |        |       |
|--------------|---------|----------------------------------------------------------------------------------------------|--------|--------|-------|
| TERG_07997T0 | Intron2 | acetamidase ( <i>T. tonsurans</i> )                                                          | 0      | 0      | 38    |
| TERG_08001T0 | Intron2 | nucleoside hydrolase, putative ( <i>T. verrucosum</i> )                                      | 0      | 0      | 173   |
| TERG_08013T0 | Intron1 | Rox3 mediator complex subunit ( <i>T. equinum</i> )                                          | 0      | 0      | 278   |
| TERG_08015T0 | Intron5 | threonine synthase                                                                           | 0      | 0      | 27    |
| TERG_08019T0 | Intron1 | hypothetical protein                                                                         | 308    | 6634   | 1284  |
| TERG_08031T0 | Intron1 | PHD finger domain-containing protein ( <i>T. equinum</i> )                                   | 0      | 0      | 255   |
| TERG_08038T0 | Intron1 | polysaccharide deacetylase family protein ( <i>T. equinum</i> )                              | 0      | 0      | 82    |
| TERG_08040T0 | Intron1 | prefoldin subunit 1 ( <i>T. tonsurans</i> )                                                  | 5411   | 0      | 22    |
| TERG_08064T0 | Intron1 | choline kinase, putative ( <i>A. benhamiae</i> )                                             | 65871  | 0      | 3094  |
| TERG_08101T0 | Intron1 | TAM domain methyltransferase ( <i>T. equinum</i> )                                           | 2072   | 0      | 378   |
| TERG_08101T0 | Intron7 | TAM domain methyltransferase ( <i>T. equinum</i> )                                           | 2240   | 0      | 0     |
| TERG_08108T0 | Intron1 | 40S ribosomal protein S22                                                                    | 0      | 19     | 5830  |
| TERG_08115T0 | Intron1 | hypothetical protein                                                                         | 4225   | 0      | 2     |
| TERG_08127T0 | Intron1 | molybdenum cofactor biosynthesis protein A                                                   | 0      | 0      | 3073  |
| TERG_08128T0 | Intron1 | hypothetical protein                                                                         | 0      | 0      | 224   |
| TERG_08128T0 | Intron2 | hypothetical protein                                                                         | 0      | 0      | 32    |
| TERG_08128T0 | Intron3 | hypothetical protein                                                                         | 0      | 0      | 650   |
| TERG_08139T0 | Intron1 | NAD dependent epimerase/dehydratase ( <i>M. gypseum</i> )                                    | 1556   | 0      | 182   |
| TERG_08140T0 | Intron1 | methyltransferase type 11 ( <i>M. gypseum</i> )                                              | 4733   | 0      | 791   |
| TERG_08153T0 | Intron2 | hypothetical protein                                                                         | 0      | 0      | 11    |
| TERG_08154T0 | Intron1 | hypothetical protein                                                                         | 0      | 0      | 358   |
| TERG_08200T0 | Intron3 | hypothetical protein                                                                         | 0      | 0      | 874   |
| TERG_08238T0 | Intron1 | copper-activated transcription factor GRISEA, putative ( <i>A. benhamiae</i> )               | 1794   | 0      | 86    |
| TERG_08250T0 | Intron1 | cation diffusion facilitator family metal ion transporter, putative ( <i>T. verrucosum</i> ) | 0      | 0      | 39    |
| TERG_08271T0 | Intron1 | RNA lariat debranching enzyme, putative ( <i>A. benhamiae</i> )                              | 0      | 0      | 192   |
| TERG_08290T0 | Intron2 | ATP binding protein ( <i>T. tonsurans</i> )                                                  | 0      | 0      | 137   |
| TERG_08314T0 | Intron1 | nucleoporin NUP49/NSP49, putative ( <i>T. verrucosum</i> )                                   | 0      | 0      | 46    |
| TERG_08319T0 | Intron2 | CMGC/SRPK protein kinase                                                                     | 0      | 0      | 46    |
| TERG_08323T0 | Intron1 | serine/threonine-protein phosphatase PP2A catalytic subunit                                  | 0      | 0      | 166   |
| TERG_08329T0 | Intron1 | flavin containing amine oxidase ( <i>T. tonsurans</i> )                                      | 0      | 0      | 9136  |
| TERG_08341T0 | Intron1 | hypothetical protein                                                                         | 43090  | 8892   | 10291 |
| TERG_08343T0 | Intron1 | hypothetical protein                                                                         | 0      | 0      | 23    |
| TERG_08343T0 | Intron2 | hypothetical protein                                                                         | 0      | 0      | 1650  |
| TERG_08369T0 | Intron4 | serine/arginine repetitive matrix protein 1 ( <i>M. canis</i> )                              | 0      | 0      | 18    |
| TERG_08381T0 | Intron1 | NUDIX domain-containing protein ( <i>T. equinum</i> )                                        | 236    | 0      | 101   |
| TERG_08383T1 | Intron1 | hypothetical protein                                                                         | 954336 | 291210 | 301   |
| TERG_08423T0 | Intron1 | hypothetical protein                                                                         | 10780  | 0      | 88    |
| TERG_08435T0 | Intron2 | 3-oxoacyl-(acyl-carrier-protein) reductase ( <i>M. canis</i> )                               | 0      | 0      | 307   |
| TERG_08462T3 | Intron1 | NAD kinase/ATP NAD kinase ( <i>T. tonsurans</i> )                                            | 0      | 0      | 57    |

|              |         |                                                                               |       |        |      |
|--------------|---------|-------------------------------------------------------------------------------|-------|--------|------|
| TERG_08462T2 | Intron1 | NAD kinase/ATP NAD kinase ( <i>T. tonsurans</i> )                             | 3024  | 0      | 6    |
| TERG_08462T4 | Intron1 | NAD kinase/ATP NAD kinase ( <i>T. tonsurans</i> )                             | 0     | 0      | 79   |
| TERG_08484T0 | Intron6 | vacuolar protein sorting vps16 ( <i>T. tonsurans</i> )                        | 0     | 0      | 1553 |
| TERG_08516T0 | Intron1 | hypothetical protein                                                          | 0     | 0      | 299  |
| TERG_08542T0 | Intron1 | GTP-binding protein ypt2                                                      | 0     | 0      | 130  |
| TERG_08551T0 | Intron2 | NADH-ubiquinone oxidoreductase 21 kDa subunit ( <i>T. tonsurans</i> )         | 0     | 0      | 50   |
| TERG_08581T0 | Intron1 | F-box protein ( <i>T. tonsurans</i> )                                         | 1753  | 0      | 48   |
| TERG_08655T0 | Intron1 | ADP,ATP carrier protein                                                       | 0     | 0      | 481  |
| TERG_08655T0 | Intron2 | ADP,ATP carrier protein                                                       | 2479  | 0      | 143  |
| TERG_08656T0 | Intron1 | hypothetical protein                                                          | 0     | 0      | 139  |
| TERG_08672T0 | Intron8 | HFR-3 ( <i>M. canis</i> )                                                     | 0     | 0      | 45   |
| TERG_08678T0 | Intron1 | RNP domain-containing protein ( <i>T. tonsurans</i> )                         | 0     | 0      | 23   |
| TERG_08678T0 | Intron2 | RNP domain-containing protein ( <i>T. tonsurans</i> )                         | 2879  | 0      | 87   |
| TERG_08678T1 | Intron1 | RNP domain-containing protein ( <i>T. tonsurans</i> )                         | 0     | 0      | 82   |
| TERG_08678T1 | Intron2 | RNP domain-containing protein ( <i>T. tonsurans</i> )                         | 5583  | 0      | 11   |
| TERG_08678T2 | Intron1 | RNP domain-containing protein ( <i>T. tonsurans</i> )                         | 0     | 0      | 23   |
| TERG_08678T2 | Intron2 | RNP domain-containing protein ( <i>T. tonsurans</i> )                         | 2732  | 0      | 118  |
| TERG_08697T0 | Intron1 | serine/threonine protein kinase                                               | 0     | 0      | 720  |
| TERG_08738T0 | Intron2 | TBP interacting domain protein, putative ( <i>A. benhamiae</i> )              | 0     | 0      | 79   |
| TERG_08747T0 | Intron1 | hypothetical protein                                                          | 0     | 0      | 17   |
| TERG_08756T0 | Intron4 | cercosporin toxin biosynthesis protein ( <i>T. equinum</i> )                  | 0     | 1991   | 427  |
| TERG_08761T0 | Intron2 | protein bfr2                                                                  | 0     | 0      | 103  |
| TERG_08761T1 | Intron1 | protein bfr2                                                                  | 0     | 0      | 133  |
| TERG_08825T0 | Intron1 | bZIP transcription factor JlbA/IDI-4 ( <i>T. verrucosum</i> )                 | 5393  | 0      | 0    |
| TERG_08825T0 | Intron2 | bZIP transcription factor JlbA/IDI-4 ( <i>T. verrucosum</i> )                 | 26873 | 11533  | 318  |
| TERG_08848T0 | Intron1 | thioredoxin, putative ( <i>A. benhamiae</i> )                                 | 0     | 0      | 198  |
| TERG_08855T0 | Intron1 | hypothetical protein                                                          | 16819 | 51164  | 705  |
| TERG_08867T0 | Intron2 | chitin synthase ( <i>T. tonsurans</i> )                                       | 0     | 0      | 56   |
| TERG_08884T0 | Intron1 | GPI-anchored cell surface glycoprotein, putative ( <i>T. verrucosum</i> )     | 0     | 7009   | 6    |
| TERG_08898T0 | Intron1 | hypothetical protein                                                          | 0     | 0      | 73   |
| TERG_08906T0 | Intron1 | hypothetical protein                                                          | 57088 | 152552 | 470  |
| TERG_08959T0 | Intron1 | hypothetical protein                                                          | 1279  | 8322   | 878  |
| TERG_08959T0 | Intron2 | hypothetical protein                                                          | 0     | 308    | 271  |
| TERG_08975T0 | Intron1 | importin beta-1 subunit ( <i>T. tonsurans</i> )                               | 0     | 0      | 73   |
| TERG_08982T0 | Intron1 | hypothetical protein                                                          | 0     | 0      | 123  |
| TERG_08986T0 | Intron1 | hypothetical protein                                                          | 0     | 0      | 200  |
| TERG_08991T0 | Intron1 | ATPase 2 nuclear control ( <i>M. gypseum</i> )                                | 0     | 14128  | 57   |
| TERG_11512T0 | Intron5 | General negative regulator of transcription subunit 4 ( <i>T. tonsurans</i> ) | 3920  | 0      | 9552 |
| TERG_11518T0 | Intron1 | glucokinase, putative ( <i>T. verrucosum</i> )                                | 0     | 0      | 2877 |
| TERG_11520T0 | Intron2 | 3' exoribonuclease ( <i>T. tonsurans</i> )                                    | 0     | 0      | 282  |
| TERG_11522T0 | Intron1 | hypothetical protein                                                          | 0     | 0      | 47   |

|              |         |                                                                                                                   |          |          |       |
|--------------|---------|-------------------------------------------------------------------------------------------------------------------|----------|----------|-------|
| TERG_11546T0 | Intron1 | hypothetical protein                                                                                              | 8161     | 0        | 1106  |
| TERG_11592T0 | Intron1 | palmitoyl-protein thioesterase ( <i>T. tonsurans</i> )                                                            | 2260     | 0        | 596   |
| TERG_11600T0 | Intron1 | MFS transporter ( <i>T. tonsurans</i> )                                                                           | 0        | 0        | 60    |
| TERG_11628T0 | Intron1 | glutamine synthetase                                                                                              | 11890474 | 16196158 | 51090 |
| TERG_11628T0 | Intron3 | glutamine synthetase                                                                                              | 16091    | 6281     | 2054  |
| TERG_11642T0 | Intron1 | forkhead transcription factor ( <i>T. tonsurans</i> )<br>phosphatidylserine decarboxylase ( <i>T. tonsurans</i> ) | 0        | 0        | 68    |
| TERG_11648T0 | Intron1 | hypothetical protein                                                                                              | 0        | 0        | 24    |
| TERG_11699T0 | Intron1 | hypothetical protein                                                                                              | 0        | 0        | 311   |
| TERG_11727T0 | Intron3 | phosphotransferase ( <i>M. canis</i> )                                                                            | 0        | 14       | 12649 |
| TERG_11733T0 | Intron1 | methionine-tRNA synthetase ( <i>T. equinum</i> )<br>DNA repair protein Rad7, protein ( <i>A. benhamiae</i> )      | 618      | 0        | 2     |
| TERG_11756T0 | Intron2 | hypothetical protein                                                                                              | 0        | 0        | 372   |
| TERG_11841T0 | Intron5 | hypothetical protein                                                                                              | 0        | 0        | 119   |
| TERG_11879T0 | Intron1 | hypothetical protein<br>sister chromatid separation protein ( <i>T. tonsurans</i> )                               | 5513     | 0        | 53285 |
| TERG_11937T0 | Intron1 | hypothetical protein                                                                                              | 0        | 0        | 206   |
| TERG_11980T0 | Intron1 | hypothetical protein                                                                                              | 3714     | 0        | 19    |
| TERG_11982T0 | Intron5 | ankyrin repeat protein ( <i>T. verrucosum</i> )                                                                   | 197087   | 89281    | 3017  |
| TERG_11991T0 | Intron1 | hypothetical protein                                                                                              | 14673    | 33510    | 1819  |
| TERG_12004T0 | Intron2 | lipase ( <i>T. tonsurans</i> )<br>nonsense-mediated mRNA decay protein 2 ( <i>T. tonsurans</i> )                  | 22010    | 119042   | 37518 |
| TERG_12026T0 | Intron2 | metallothionein family protein ( <i>T. equinum</i> )                                                              | 0        | 0        | 13    |
| TERG_12028T0 | Intron2 | DUF821 domain protein ( <i>T. verrucosum</i> )                                                                    | 0        | 0        | 8251  |
| TERG_12036T0 | Intron1 | CMGC/SRPK protein kinase ( <i>T. equinum</i> )                                                                    | 0        | 0        | 31    |
| TERG_12054T0 | Intron2 | HEAT repeat protein ( <i>A. benhamiae</i> )                                                                       | 0        | 0        | 28    |
| TERG_12078T0 | Intron1 | hypothetical protein                                                                                              | 112896   | 34542    | 236   |
| TERG_12112T0 | Intron1 | hypothetical protein                                                                                              | 0        | 0        | 146   |
| TERG_12164T0 | Intron1 | hypothetical protein                                                                                              | 0        | 0        | 46    |
| TERG_12164T0 | Intron2 | hypothetical protein                                                                                              | 126105   | 31484    | 13802 |
| TERG_12186T0 | Intron1 | hypothetical protein                                                                                              | 447      | 0        | 0     |
| TERG_12201T0 | Intron1 | hypothetical protein                                                                                              | 25968    | 17062    | 238   |
| TERG_12222T0 | Intron1 | polyketide synthase ( <i>T. equinum</i> )                                                                         | 0        | 0        | 281   |
| TERG_12269T0 | Intron1 | curved DNA-binding protein ( <i>T. tonsurans</i> )                                                                | 0        | 0        | 467   |
| TERG_12291T0 | Intron1 | mitochondrial cytochrome b2 ( <i>T. tonsurans</i> )                                                               | 4635     | 15557    | 193   |
| TERG_12291T1 | Intron1 | mitochondrial cytochrome b2 ( <i>T. tonsurans</i> )                                                               | 9211     | 15246    | 194   |
| TERG_12291T1 | Intron2 | mitochondrial cytochrome b2 ( <i>T. tonsurans</i> )                                                               | 0        | 0        | 13    |
| TERG_12303T0 | Intron2 | myosin-1                                                                                                          | 111371   | 131355   | 15365 |
| TERG_12349T0 | Intron1 | hypothetical protein                                                                                              | 0        | 641      | 1337  |
| TERG_12351T0 | Intron1 | hypothetical protein                                                                                              | 23831    | 18767    | 4987  |
| TERG_12427T0 | Intron2 | T-complex protein 1 ( <i>T. tonsurans</i> )                                                                       | 0        | 0        | 506   |
| TERG_12442T0 | Intron1 | hypothetical protein<br>C6 transcription factor, putative ( <i>T. verrucosum</i> )                                | 0        | 0        | 16    |
| TERG_12458T0 | Intron1 | ABC bile acid transporter, putative ( <i>T. verrucosum</i> )                                                      | 0        | 0        | 137   |
| TERG_12477T0 | Intron1 | DUF250 domain membrane protein ( <i>T. equinum</i> )                                                              | 0        | 0        | 84    |
| TERG_12551T0 | Intron1 | hypothetical protein                                                                                              | 17318    | 0        | 455   |
| TERG_12568T0 | Intron3 | hypothetical protein                                                                                              | 0        | 0        | 1221  |
| TERG_12591T0 | Intron1 | peptidase S8 family protein ( <i>T. equinum</i> )<br>ankyrin repeat-containing protein ( <i>T. equinum</i> )      | 20164    | 20794    | 1027  |
| TERG_12616T0 | Intron2 | hypothetical protein                                                                                              | 6131     | 10869    | 30    |

|              |         |                                                                 |      |       |      |
|--------------|---------|-----------------------------------------------------------------|------|-------|------|
| TERG_12633T0 | Intron1 | conserved lysine-rich protein, putative ( <i>A. benhamiae</i> ) | 0    | 0     | 114  |
| TERG_12641T0 | Intron2 | Poly(A) polymerase PAPalpha ( <i>T. tonsurans</i> )             | 0    | 0     | 72   |
| TERG_12642T0 | Intron2 | Poly(A) polymerase PAPalpha ( <i>T. tonsurans</i> )             | 0    | 0     | 14   |
| TERG_12645T0 | Intron1 | hypothetical protein                                            | 8847 | 15472 | 1207 |
| TERG_12681T0 | Intron1 | alpha-mannosidase ( <i>T. tonsurans</i> )                       | 0    | 0     | 49   |
| TERG_12694T0 | Intron1 | hypothetical protein                                            | 0    | 0     | 22   |

Filter = at least one condition with more than 10 read counts.

**Supplementary Table S5.** List of primers used in RT-PCR and/or qRT-PCR assays.

| ID <sup>(*)</sup> | Gene Product Name                                                           | Primers (5' - 3')                                          | Amplicon (bp)             | Efficiency (%) | Concentration (nM) |
|-------------------|-----------------------------------------------------------------------------|------------------------------------------------------------|---------------------------|----------------|--------------------|
| TERG_01184        | fatty acid-binding protein ( <i>T. equinum</i> )                            | FW: AGATCGACGCTTTCCTTC<br>REV: CGTTGGTGAGGGTGAAGG          | 126                       | 99.42          | 300                |
| TERG_01252        | catalase A                                                                  | FW: GGAGAGCTATGGTGTGGTTAC<br>REV: GTTCCCTCTCGTAATTCCTGTG   | 143                       | 100.45         | 500                |
| TERG_01281        | malate synthase, glyoxysomal                                                | FW: ACCCCTAACCAACTCTTTGTC<br>REV: GAAGCCATCCCTCCATGTAAG    | 145                       | 102.92         | 700                |
| TERG_01463        | cytochrome c peroxidase ( <i>T. tonsurans</i> )                             | FW: CCACATCCGACACATCTTCTAC<br>REV: GAGAATCGGGTTGGGTTGTT    | 141                       | 113            | 200                |
| TERG_01475        | DNA topoisomerase 2                                                         | FW: TTTGGAACCCAGCGGTAAC<br>REV: CGAGCACTGGCACTGTCAGA       | 63                        | 93.69          | 200                |
| TERG_02214        | carboxypeptidase 2                                                          | FW: ACGAAGGCGTCGTCCTACT<br>REV: AAAGCAACAAAGGCAAGAGC       | 118                       | 101.89         | 700                |
| TERG_02601        | Phosphoglucomutase ( <i>T. tonsurans</i> )                                  | FW: CGGCAGATAATTCCGGTGTA<br>REV: CTAGGAGATGCGATGCCAATAG    | 141                       | 114            | 200                |
| TERG_02601        | Phosphoglucomutase exon-4 usage                                             | FW: AGGTATACATGTGTGGTGG<br>REV: CATTATCTGTGCCGGGT          | 125                       | 95.17          | 70/100             |
| TERG_03078        | cytochrome P450 oxidoreductase OrdA-like, putative ( <i>T. verrucosum</i> ) | FW: CCATGACAATACTCTACGGCTC<br>REV: GGCTGATCCTTGGGTACTTTG   | 142                       | 95.82          | 800                |
| TERG_03719        | MFS sugar transporter ( <i>T. tonsurans</i> )                               | FW: TTGAGAAGGTTGAAGGGCTG<br>REV: ACTGTTTCGTCCATTCCTG       | 145                       | 96.84          | 700                |
| TERG_04038        | acyl-CoA dehydrogenase ( <i>T. tonsurans</i> )                              | FW: ACTCTAAGGATTGCTGATGGC<br>REV: CATTGAGTAACCTATCCGCCTC   | 133                       | 100.05         | 700                |
| TERG_04960        | glutathione transferase ( <i>A. benhamiae</i> )                             | FW: CCCAAACACCGACCTGAA<br>REV: TCGTTGGTATCGTGTGGAAAG       | 105                       | 107.35         | 200                |
| TERG_05575        | MFS multidrug transporter ( <i>T. tonsurans</i> )                           | FW: GAGGTTTGTCTGGATCGTCTG<br>REV: CCCTGATTCAAGTCATACGAG    | 87                        | 99.23          | 800                |
| TERG_05742        | DNA-dependent RNA polymerase II RPB140                                      | FW: CCTCTACACTTCCCATCTTCG<br>REV: TGACAAGACCACAAGCCTG      | 59                        | 94.99          | 200                |
| TERG_06509        | glutamate synthase ( <i>T. tonsurans</i> )                                  | FW: CCCACTCTACCCTTGCTATTG<br>REV: ATCTTCACCGCCTTCGCCAGTATT | 71                        | 98.74          | 800                |
| TERG_06625        | serine protease, putative ( <i>A. benhamiae</i> )                           | FW: GCTCGATGTTAGGCATTACC<br>REV: GGTGGCGAACTTATAGGACTG     | 119                       | 95.60          | 400                |
| TERG_06846        | inosine-5'-monophosphate dehydrogenase                                      | FW: GTGGGCGGACAGAGTTT<br>REV: CGGCAATGAGATATGGGACGAA       | 481 / 684 <sup>(as)</sup> | -              | -                  |
| TERG_07544        | lipase ( <i>T. tonsurans</i> )                                              | FW: TGCCAAAGACGGTAAAGAGG<br>REV: TGAGAACAGAGTCGAAAACCG     | 113                       | 95.40          | 800                |
| TERG_07691        | sterol carrier protein ( <i>T. tonsurans</i> )                              | FW: GTTTGGAAATGCTGGTGTGCG<br>REV: TGTACTCGGTTTGGAAATTGGG   | 128                       | 97.92          | 700                |
| TERG_08130        | ABC ATPase ( <i>T. equinum</i> )                                            | FW: AAAGGCCGGAGTCCATTATG<br>REV: TCGAGGTCAACTTCAACATCAG    | 150                       | 98.45          | 800                |
| TERG_08557        | carboxypeptidase S1, putative ( <i>A. benhamiae</i> )                       | FW: GGTTCGCTTGTTTACGGTG<br>REV: AATTCGTGGGTGTCAGTGTAG      | 96                        | 100.03         | 700                |
| TERG_11637        | isocitrate lyase                                                            | FW: TATCCATCGTCTGGGAGAGC<br>REV: GCTTAGCGTATGCCTTGGA       | 144                       | 108.63         | 700                |
| TERG_12530        | 3-ketoacyl-CoA thiolase peroxisomal A ( <i>T. tonsurans</i> )               | FW: CTCCTTATGAAGCGTTCTACCG<br>REV: AGAGGCTTAACACCGACAAC    | 89                        | 98.09          | 700                |

(\*) TERG: gene accession number at the *T. rubrum* genome database at the Broad Institute.

(as) Alternative splicing intron retention (intron-2) by RT-PCR.
